# Supplementary material for: A quick and efficient route to substituted quinolines by electrophilic cyclization of 1-(2-aminoaryl)-2-yn-1-ols
Source: Royal Society of Chemistry journal article supplement (doi:10.1039/c2ra20213a), 2012-01-01

# **A Quick and Efficient Access to Substituted Quinolines by Electrophilic Cyclization of 1-(2-aminoaryl)-2-yn-1-ols.**

Maddi Sridhar Reddy\* Nuligonda Thirupathi, and Yalla Kiran Kumar

*Medicinal and Process Chemistry Division, Central Drug Research Institute, CSIR, Lucknow  
226 001, India*

[msreddy@cdri.res.in](mailto:msreddy@cdri.res.in); [sridharreddymaddi@yahoo.com](mailto:sridharreddymaddi@yahoo.com)

## **Supporting Information**

Copy of  $^1\text{H}$  &  $^{13}\text{C}$  NMR and HRMS Spectra.....S2-69

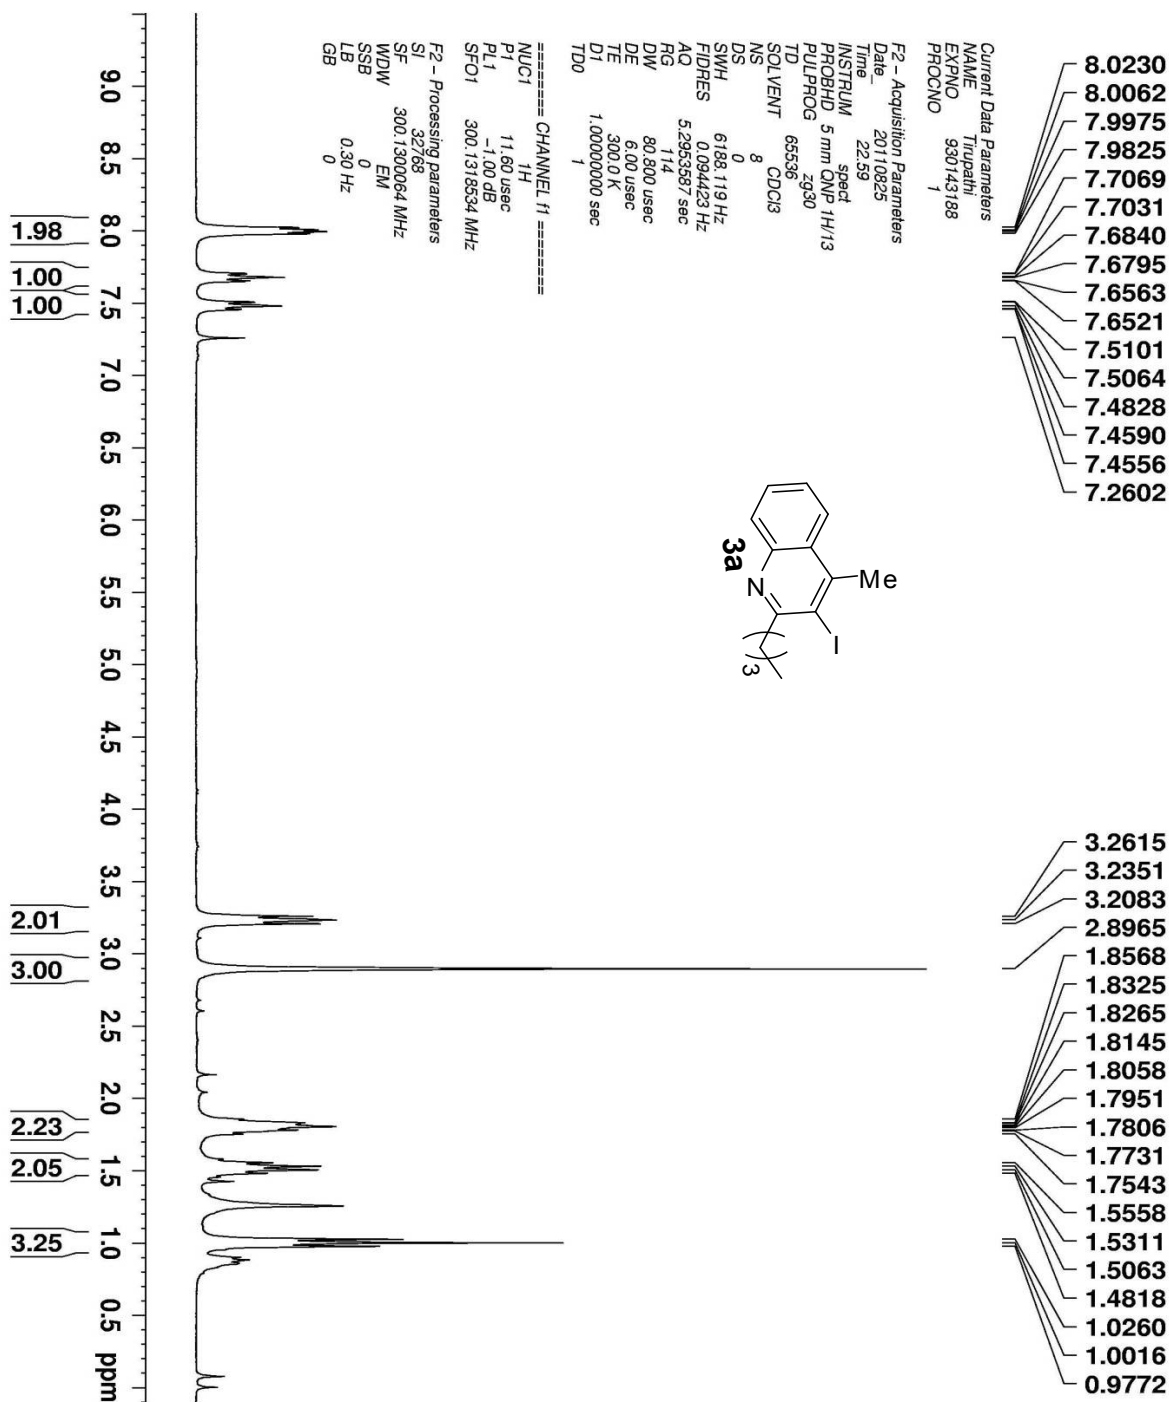

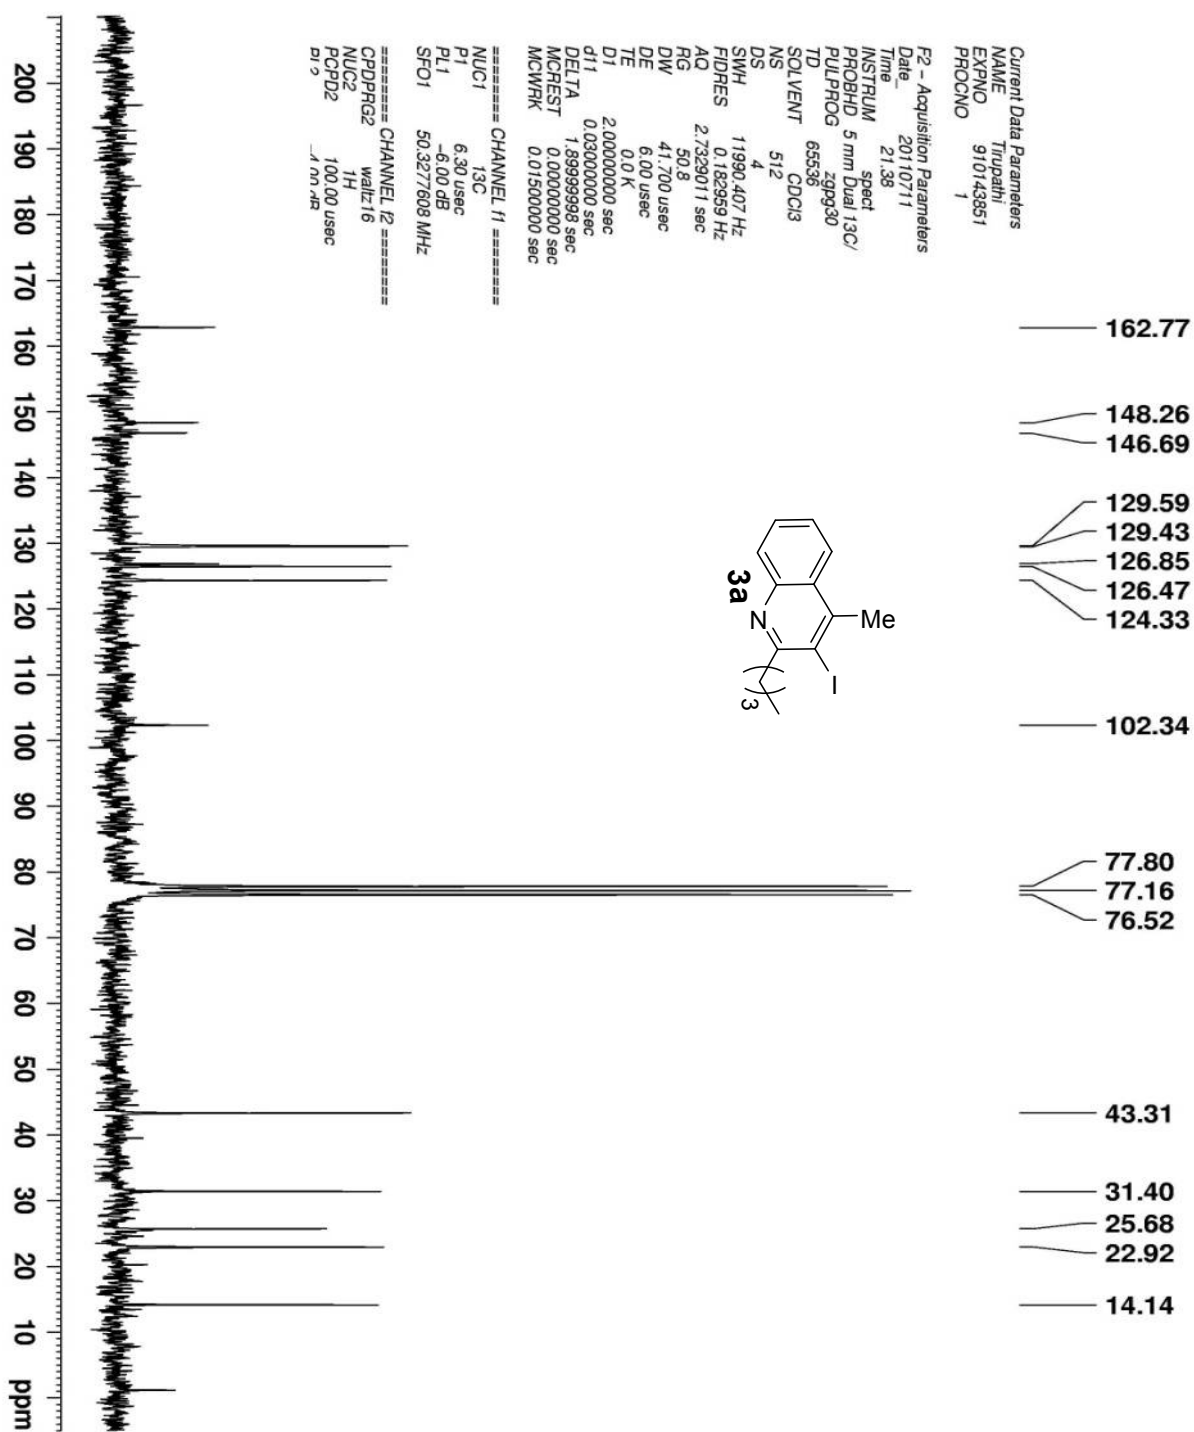

|               |                    |             |                    |                 |              |                        |                       |
|---------------|--------------------|-------------|--------------------|-----------------|--------------|------------------------|-----------------------|
| Sample Name   | 143-85-SP-1        | Position    | Vial 41            | Instrument Name | Instrument 1 | User Name              | Success               |
| Inj Vol       | -1                 | InjPosition |                    | SampleType      | Sample       | IRM Calibration Status |                       |
| Data Filename | 143-85-SP-1_024A.d | ACQ Method  | 150_3000_FULL SCAN | Comment         |              | Acquired Time          | 7/19/2011 11:32:17 AM |

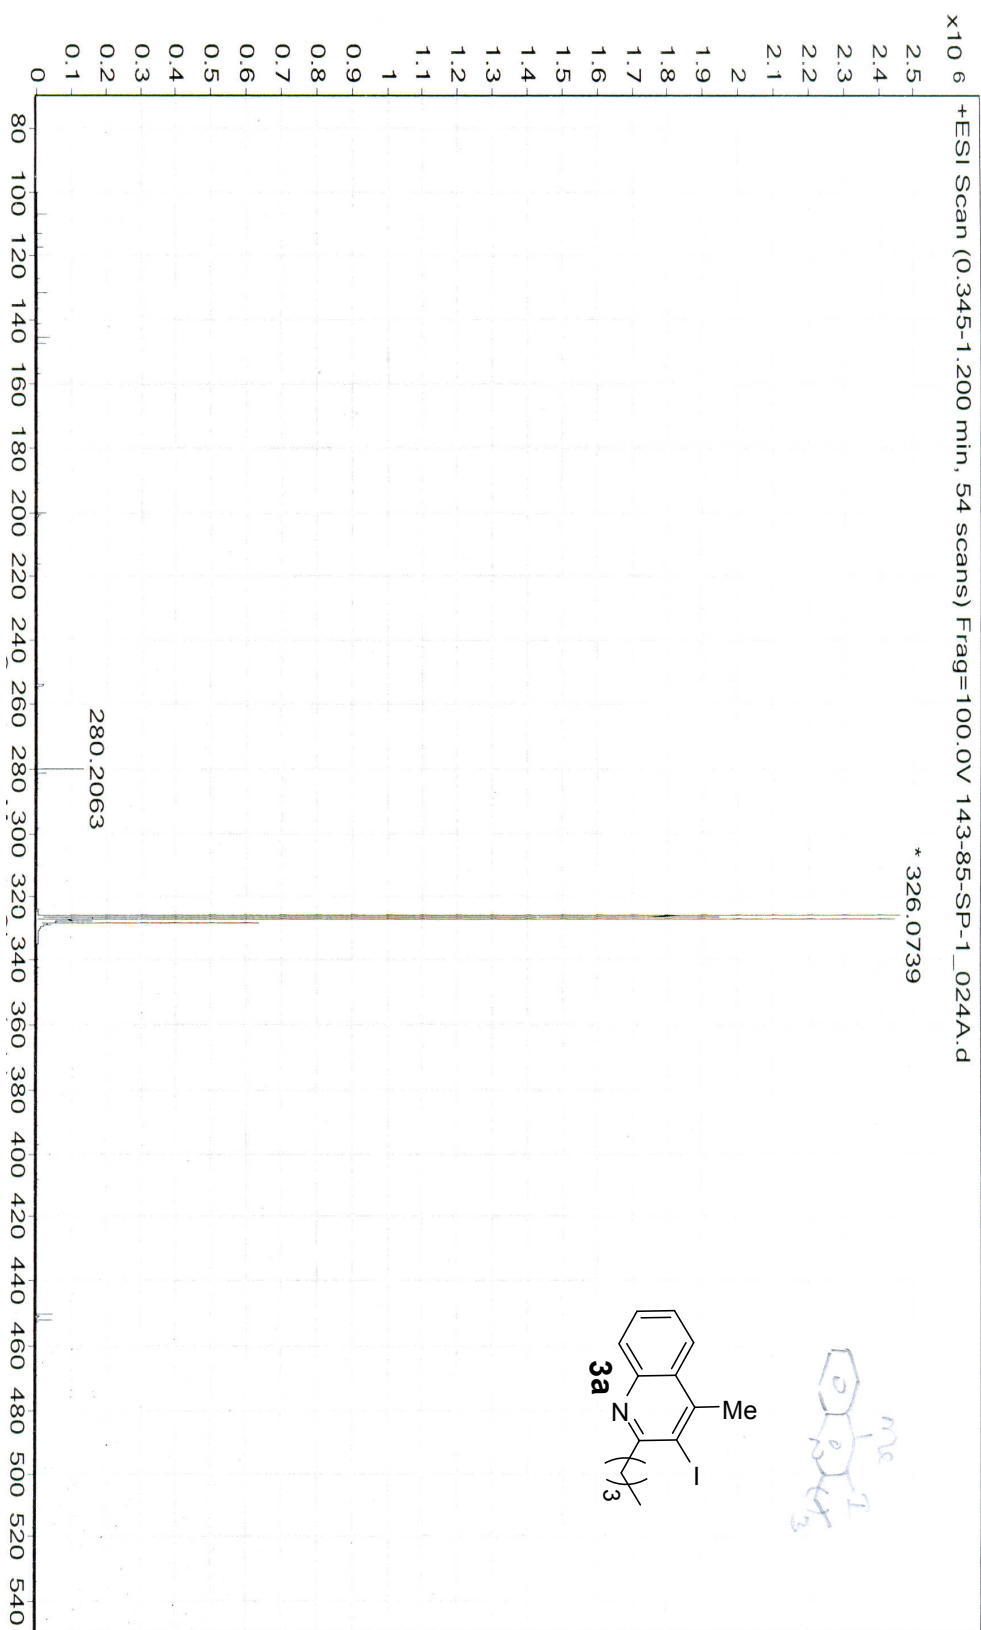

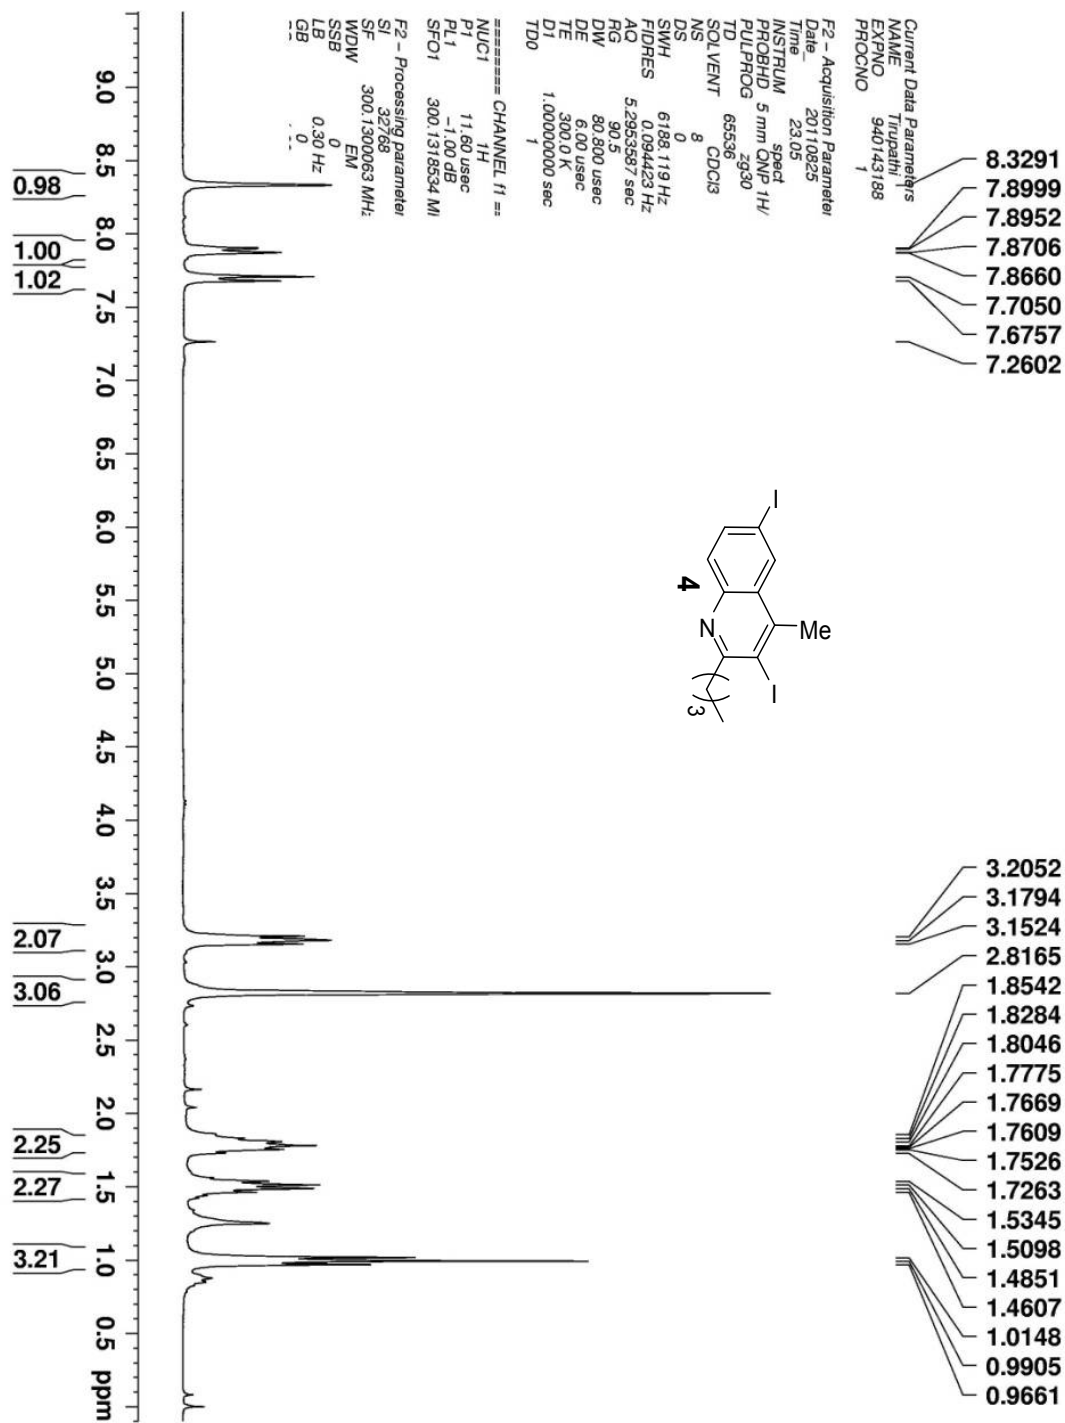

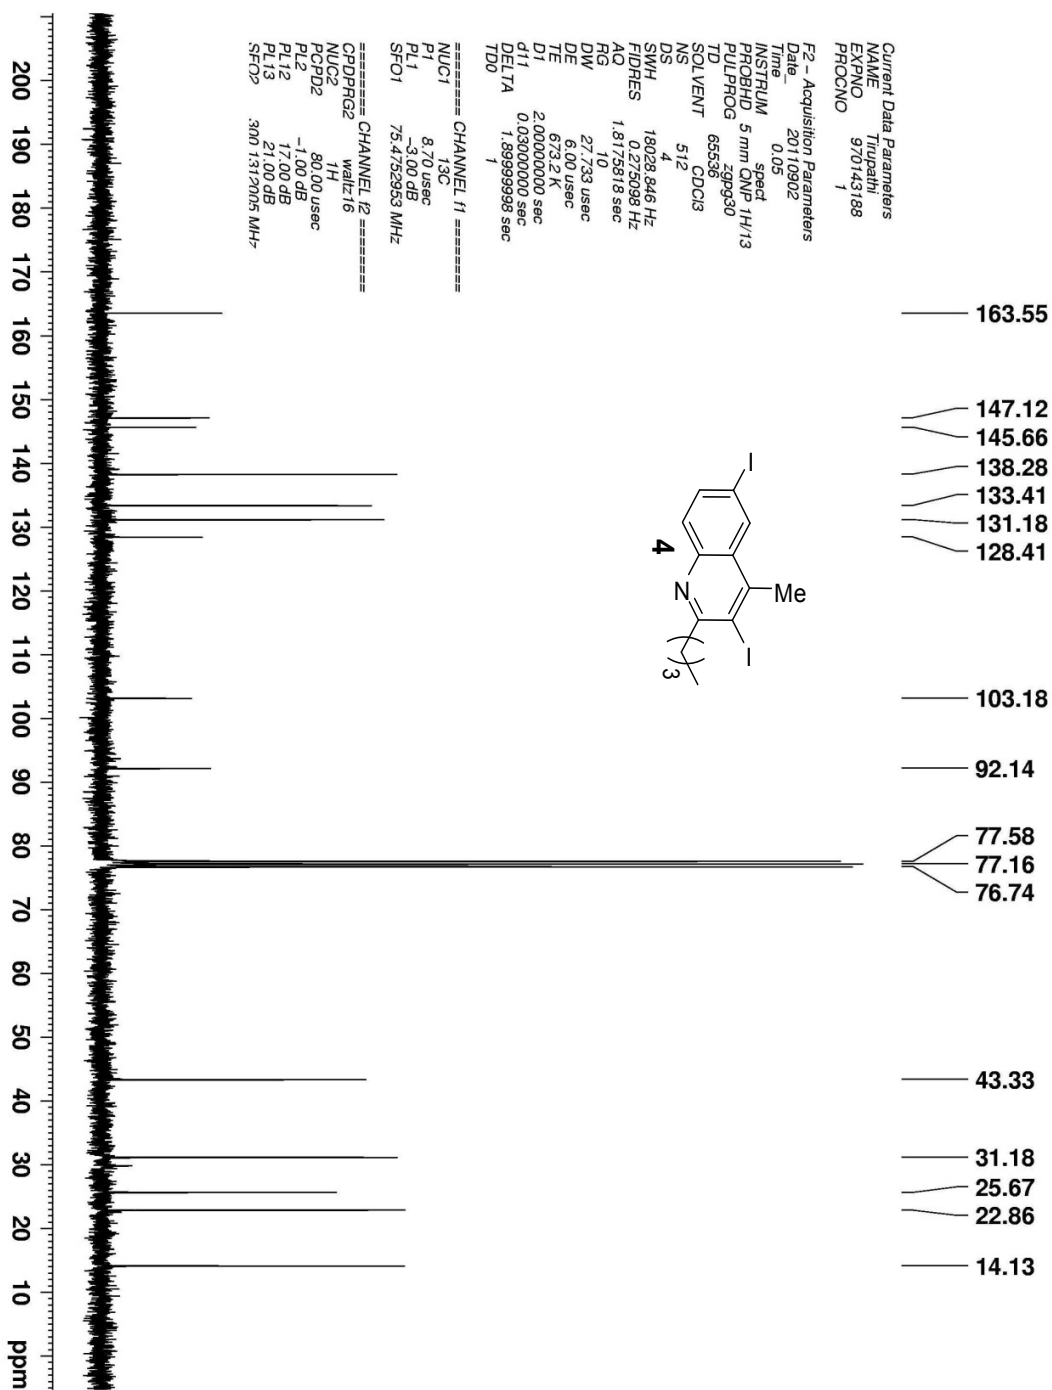

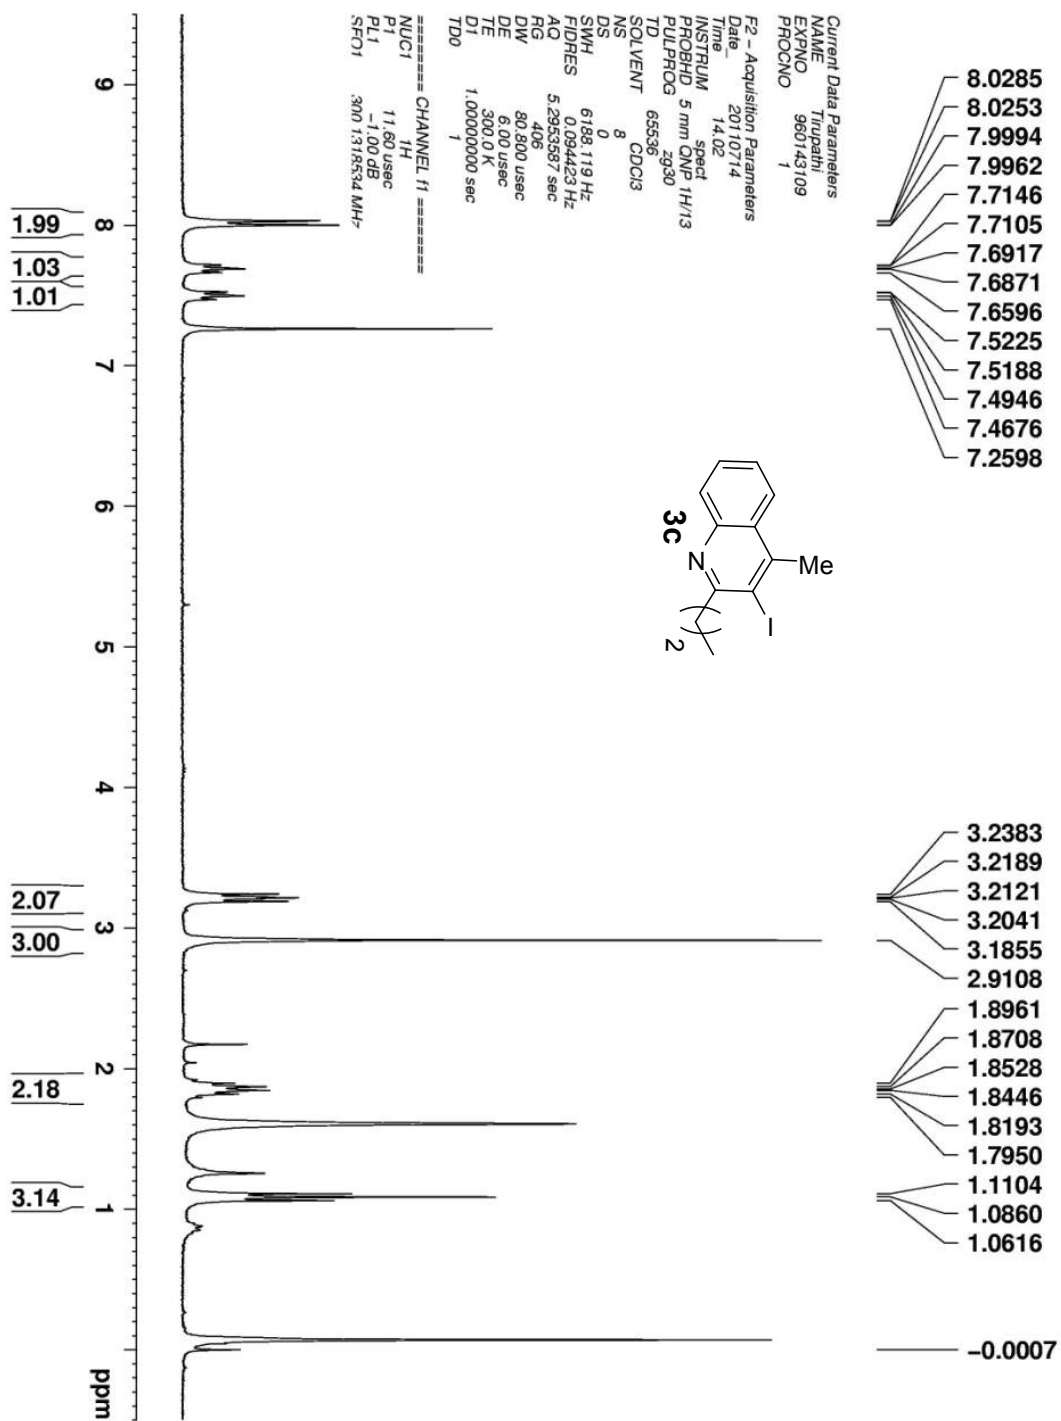

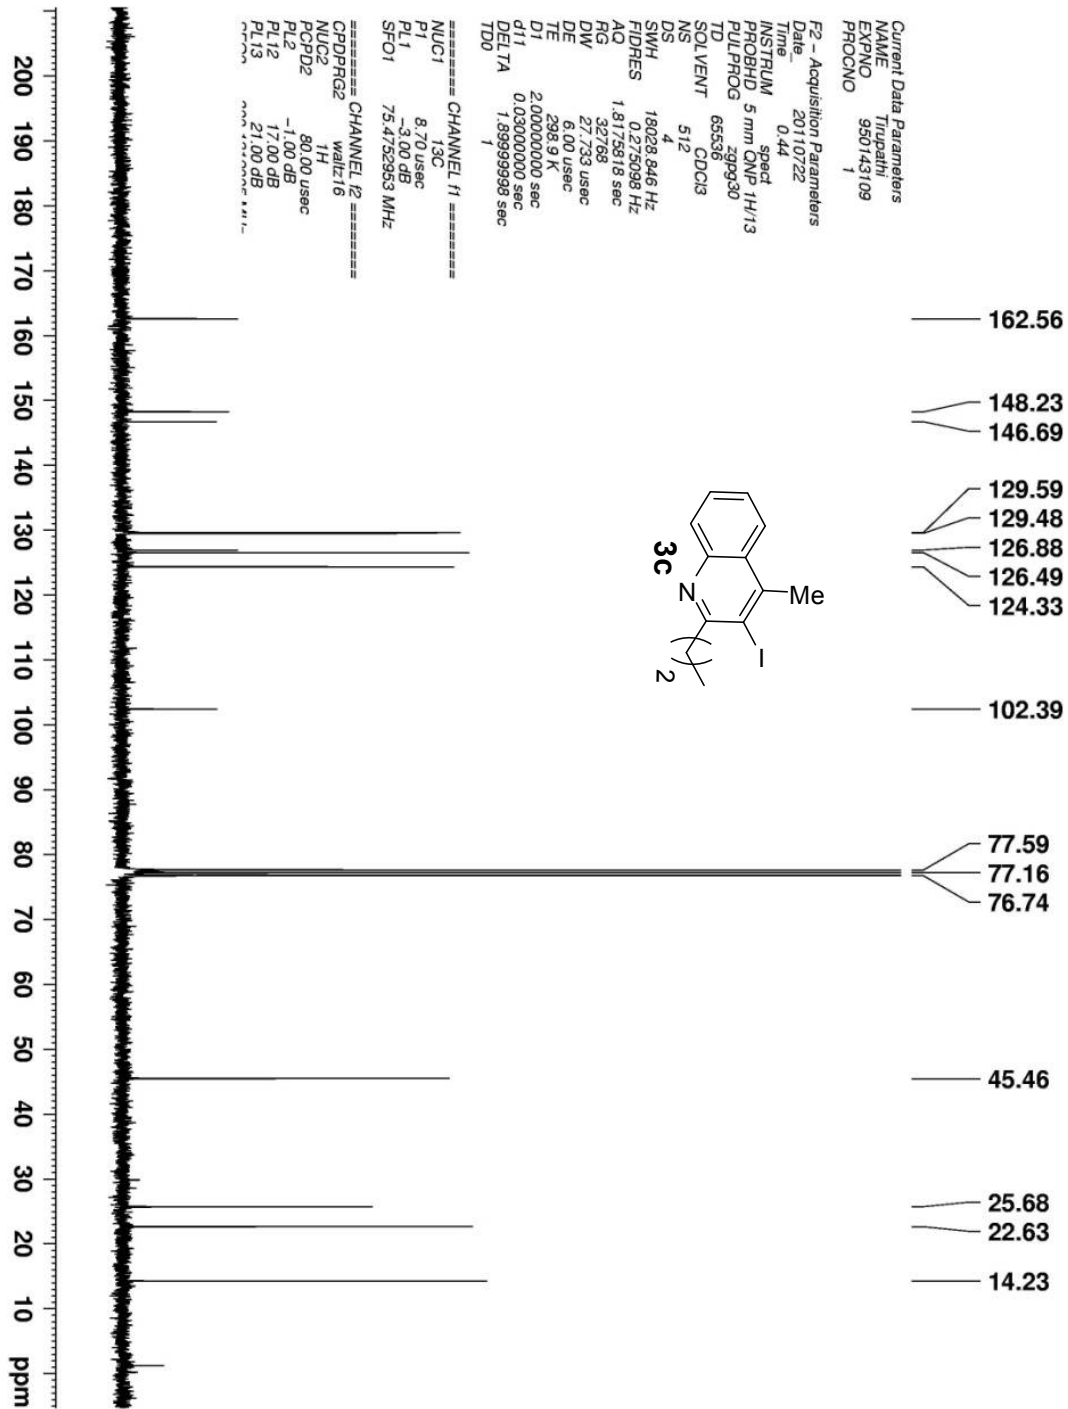



|               |                     |             |                    |                 |              |                        |                      |
|---------------|---------------------|-------------|--------------------|-----------------|--------------|------------------------|----------------------|
| Sample Name   | 143-109-SP-1        | Position    | Vial 42            | Instrument Name | Instrument 1 | User Name              |                      |
| inj Vol       | -1                  | InjPosition |                    | SampleType      | Sample       | IRM Calibration Status | Success              |
| Data Filename | 143-109-SP-1_020A.d | ACQ Method  | 150_3000_FULL_SCAN | Comment         |              | Acquired Time          | 8/4/2011 12:50:31 PM |

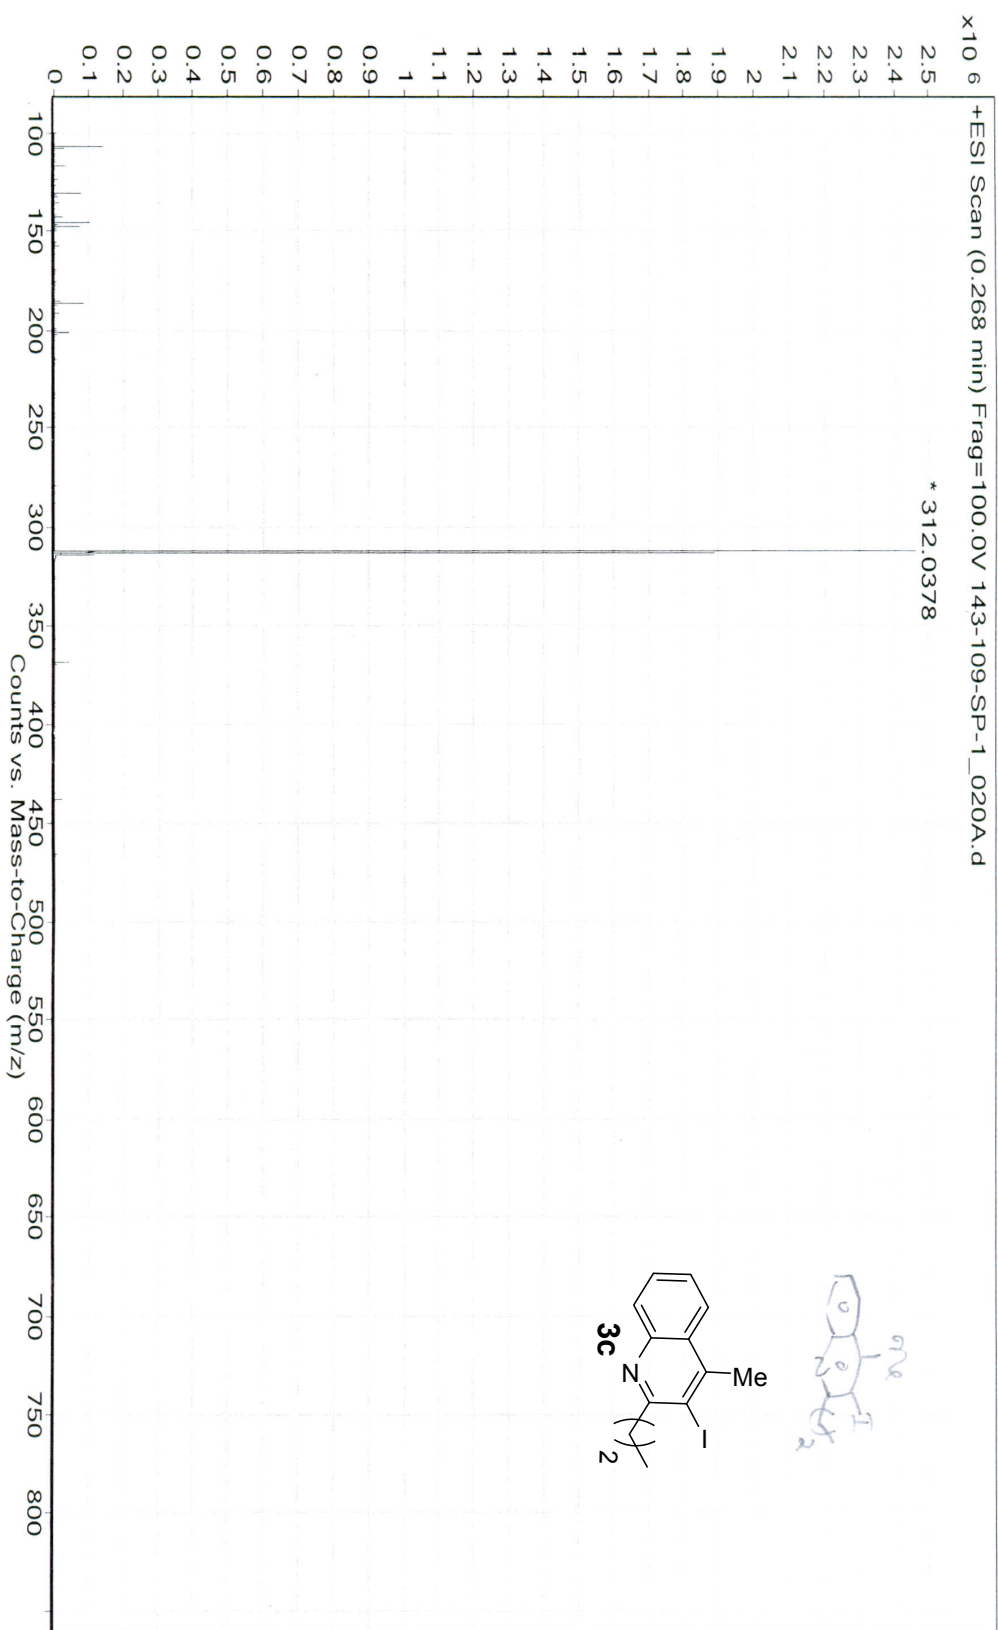

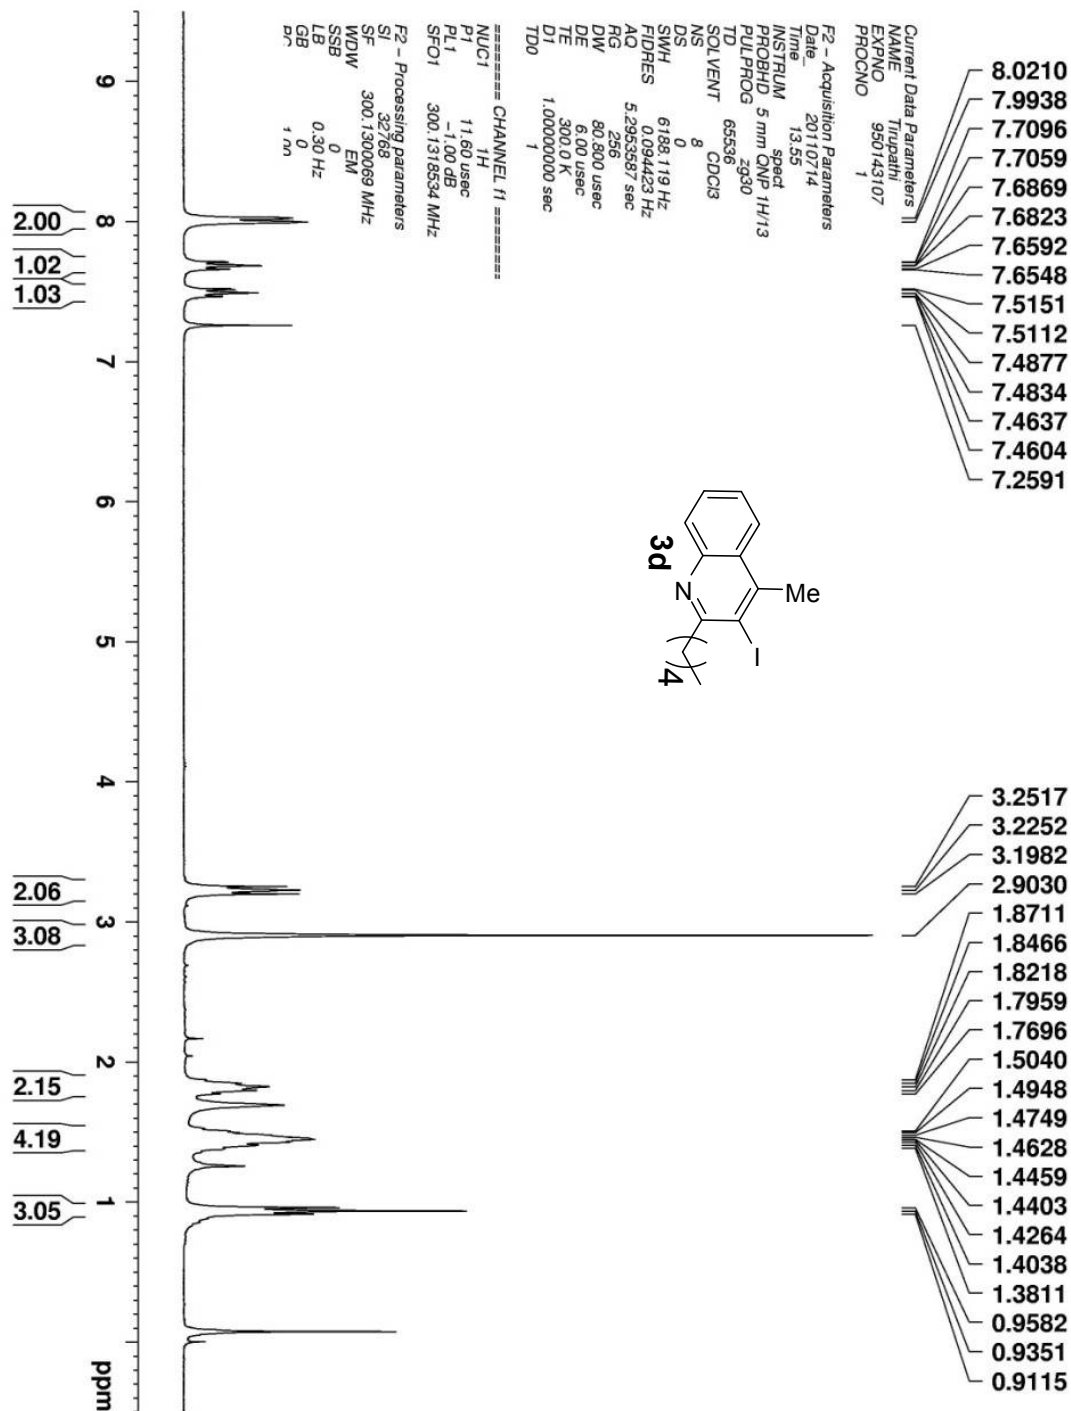

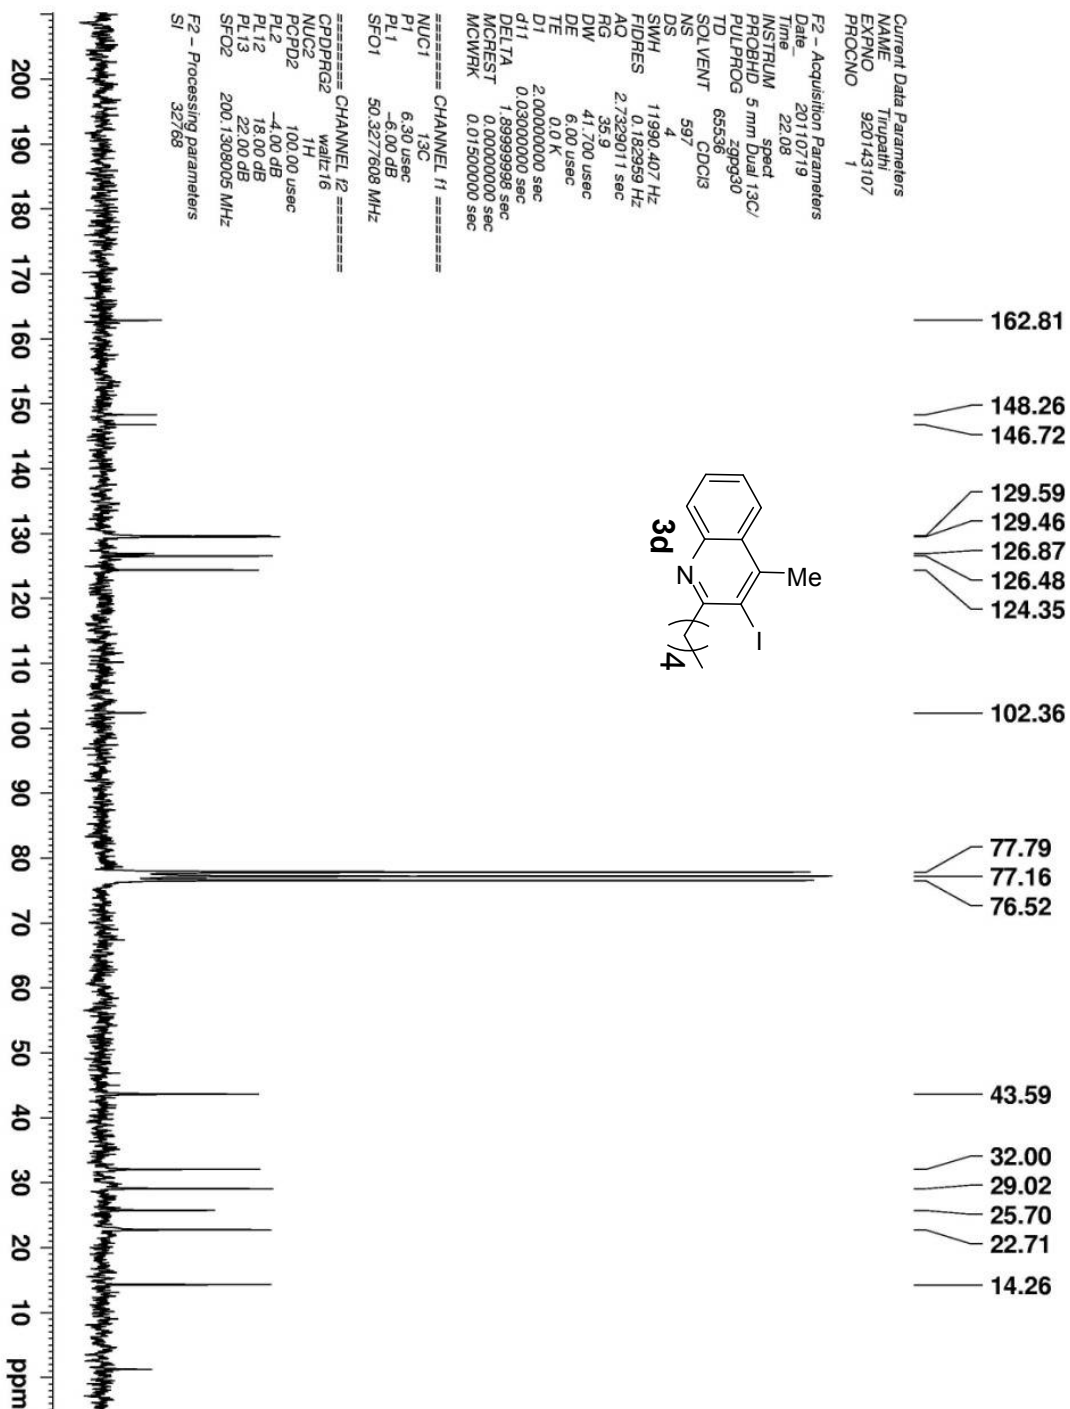

|               |                     |             |                    |                 |              |                        |                       |
|---------------|---------------------|-------------|--------------------|-----------------|--------------|------------------------|-----------------------|
| Sample Name   | 143-107-SP-1        | Position    | Vial 41            | Instrument Name | Instrument 1 | User Name              |                       |
| Inj Vol       | -1                  | InjPosition |                    | SampleType      | Sample       | IRM Calibration Status | Success               |
| Data Filename | 143-107-SP-1_038A.d | Acq Method  | 150_3000_FULL SCAN | Comment         |              | Acquired Time          | 7/21/2011 12:49:42 PM |

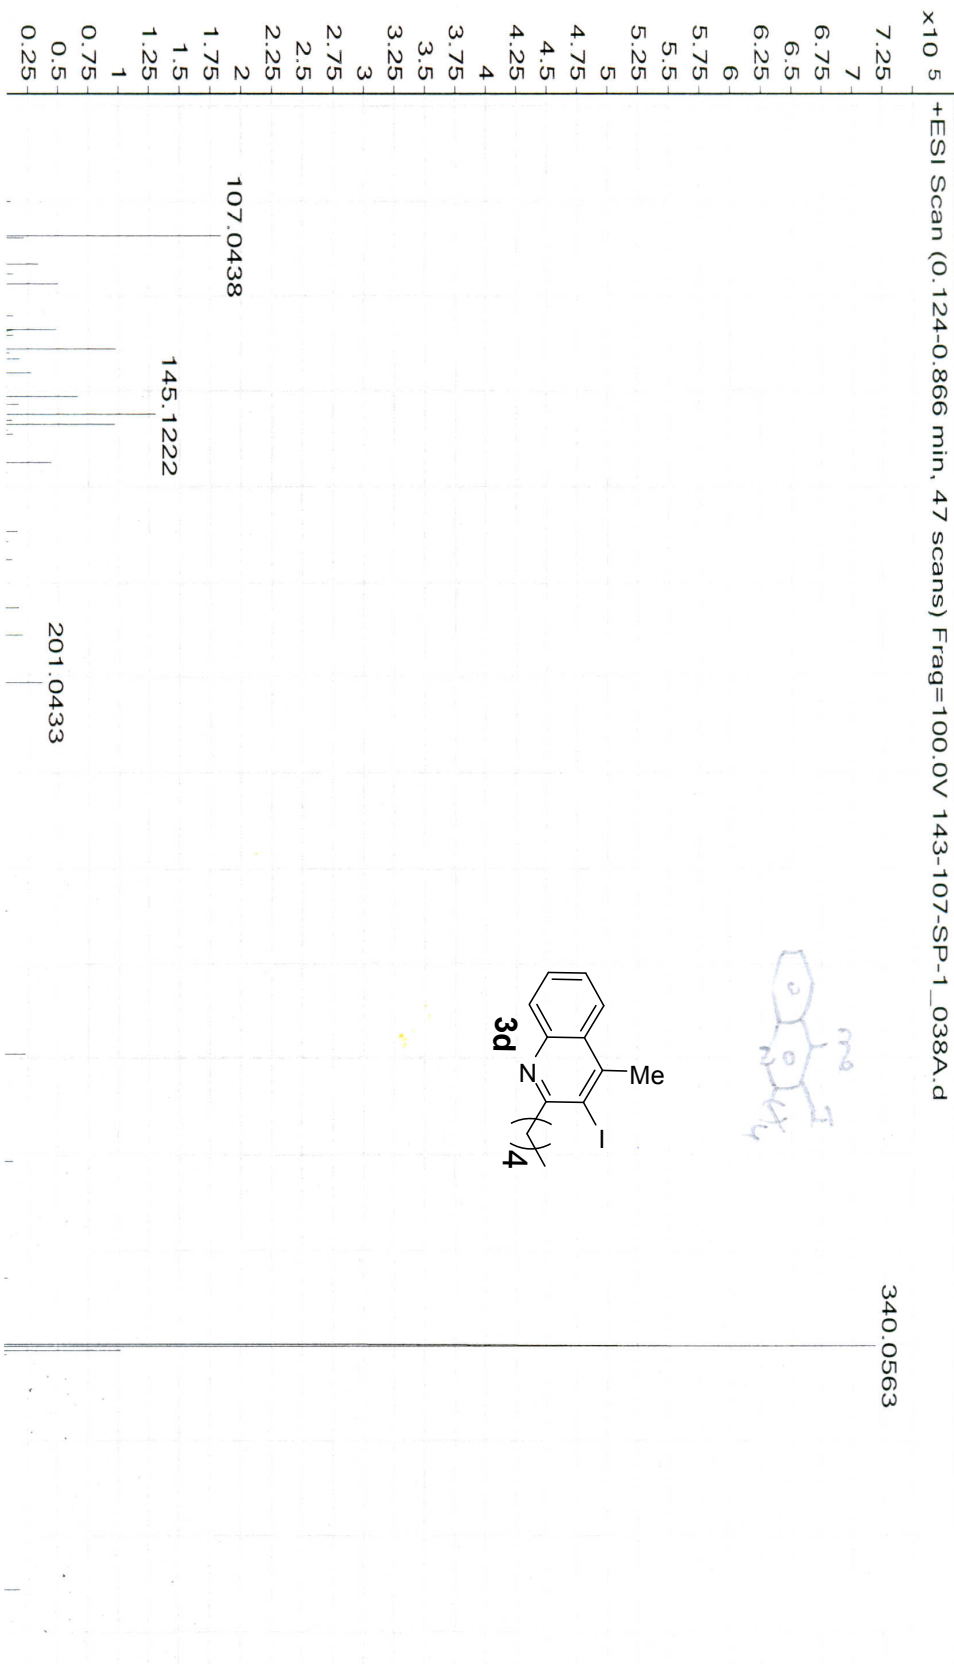

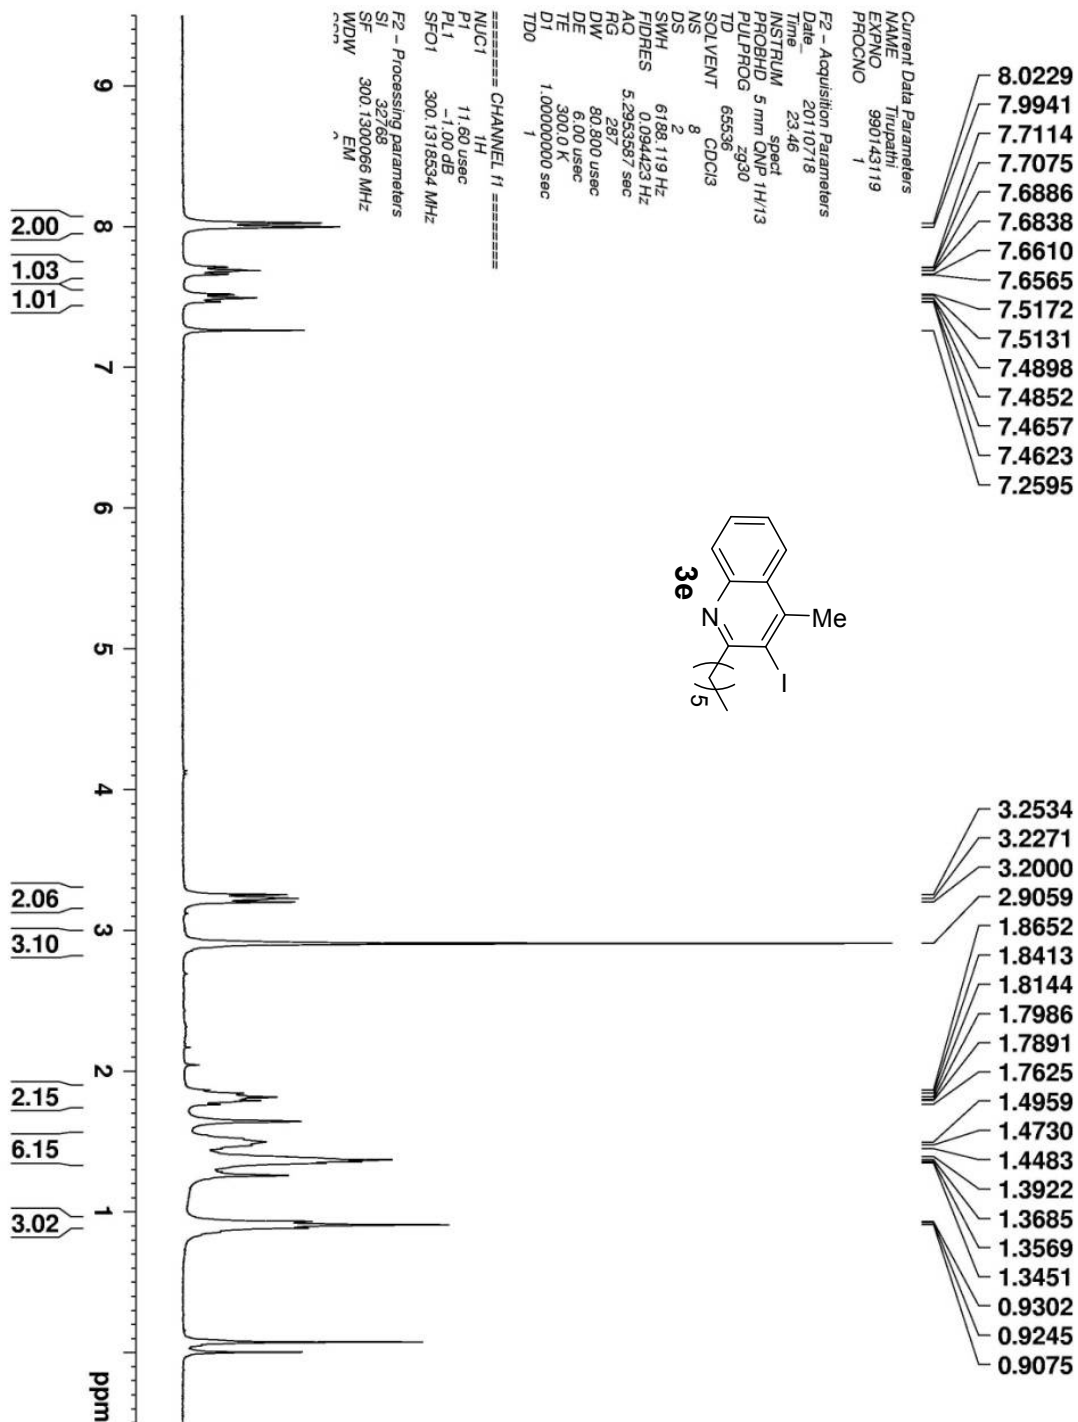

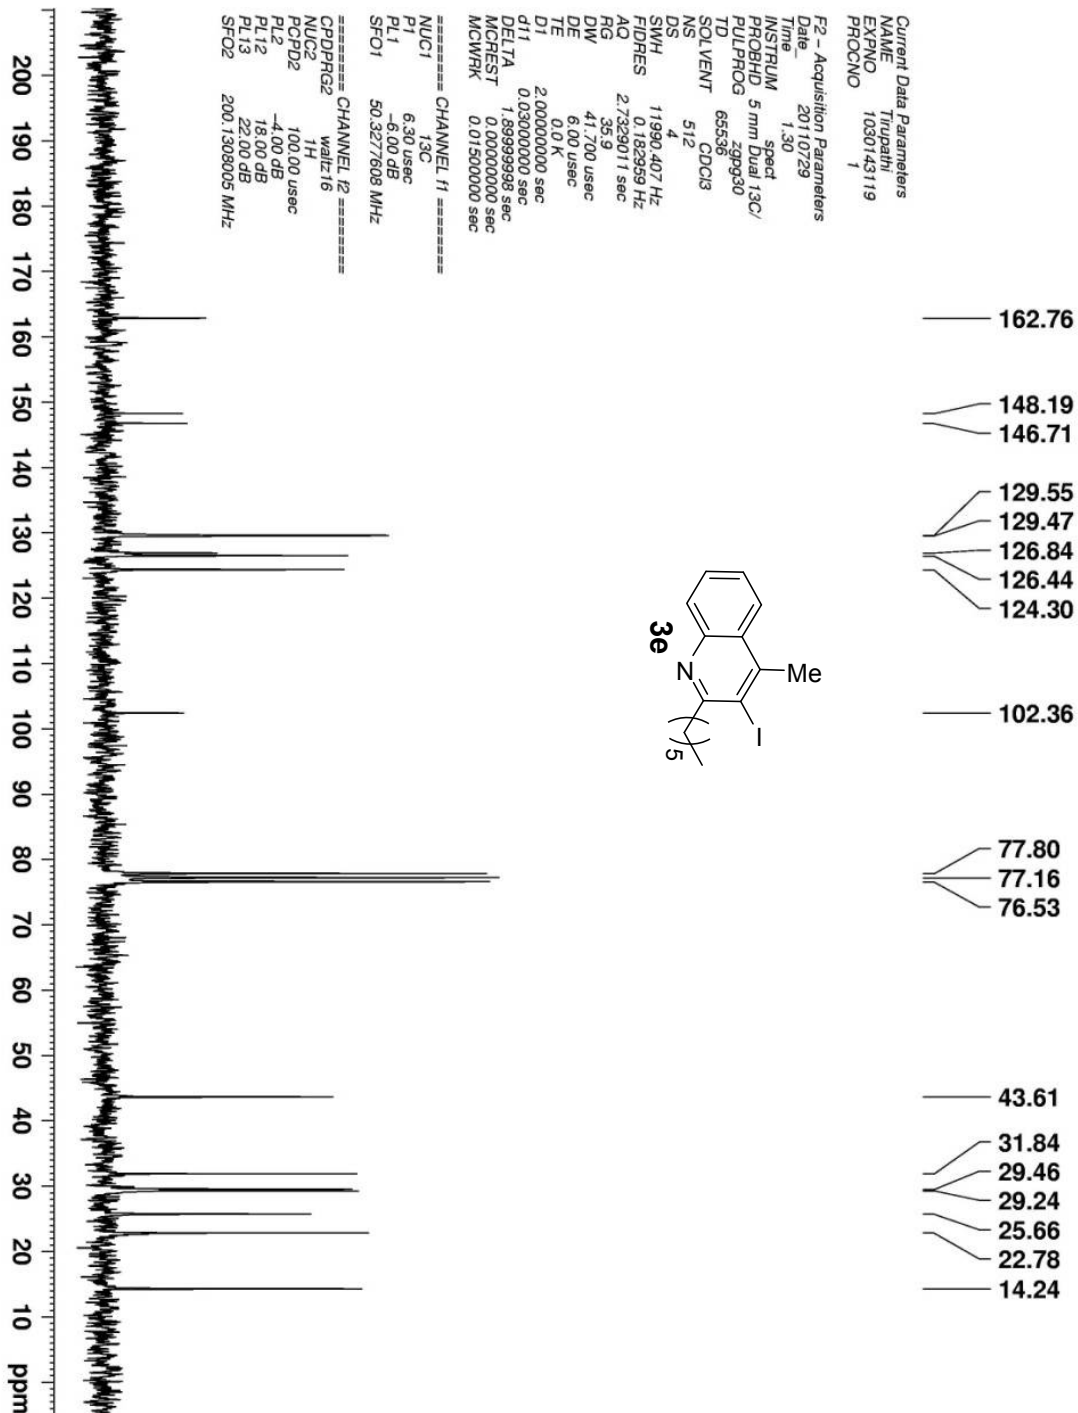

|               |                     |             |                    |                 |              |                        |                      |
|---------------|---------------------|-------------|--------------------|-----------------|--------------|------------------------|----------------------|
| Sample Name   | 143-119-SP-1        | Position    | Vial 44            | Instrument Name | Instrument 1 | User Name              |                      |
| Inj Vol       | -1                  | InjPosition |                    | SampleType      | Sample       | IRM Calibration Status | Success              |
| Data Filename | 143-119-SP-1_032A.d | ACQ Method  | 150_3000_FULL_SCAN | Comment         |              | Acquired Time          | 8/5/2011 11:16:36 AM |

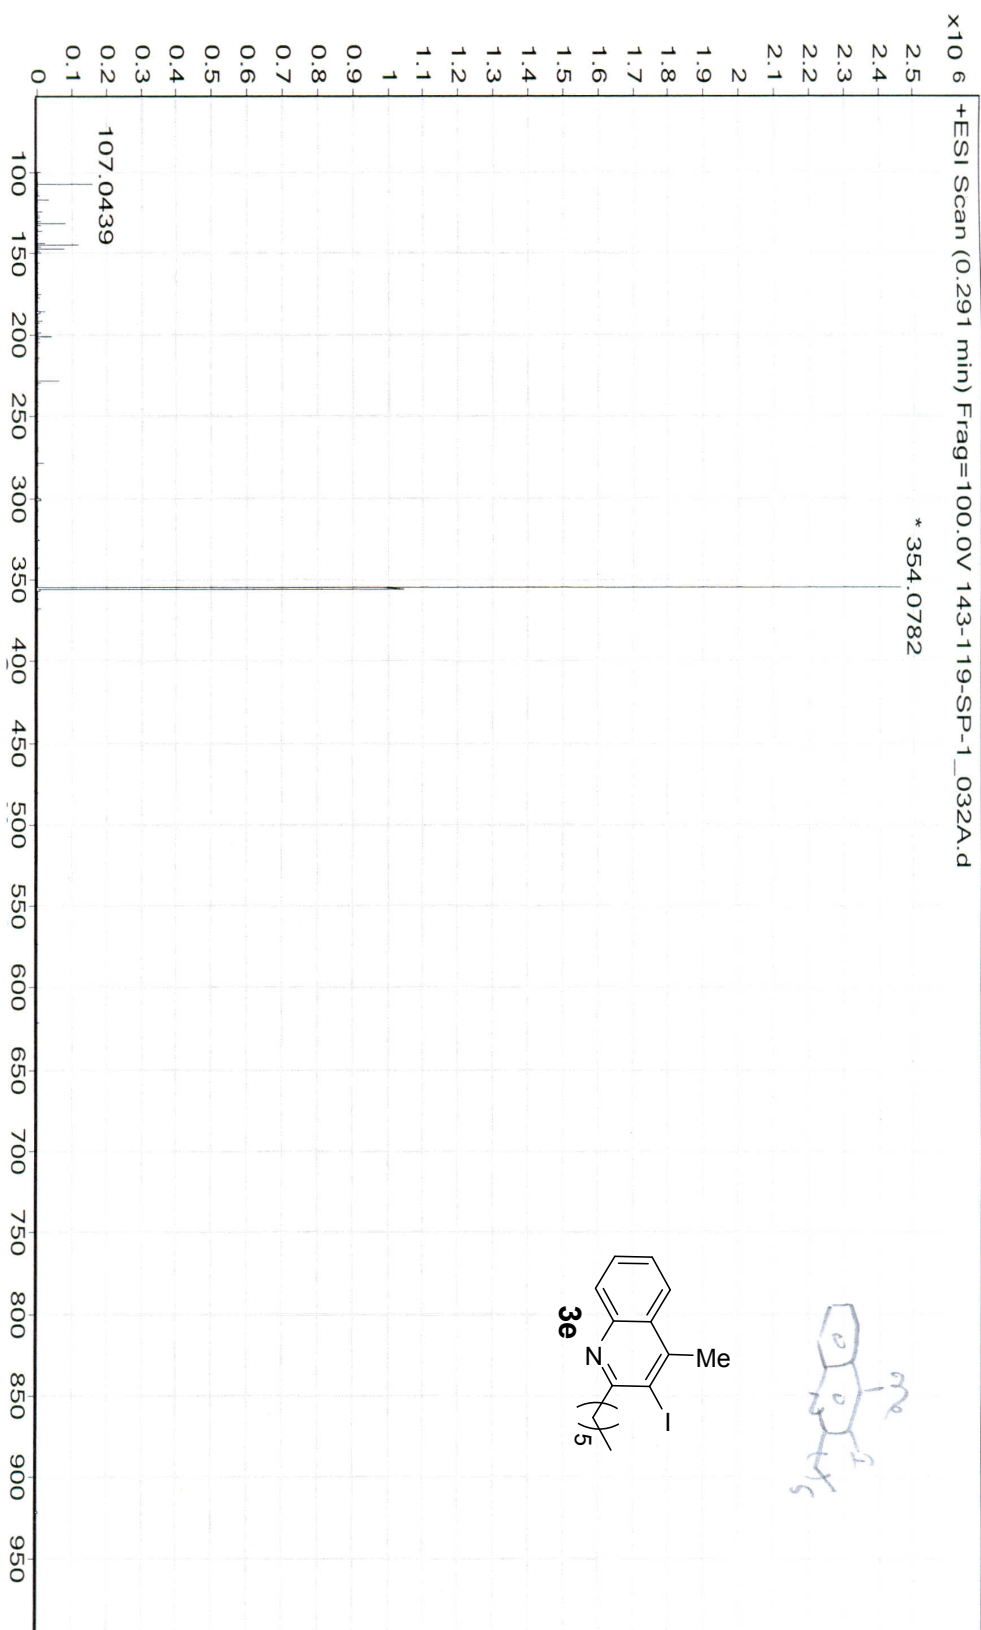

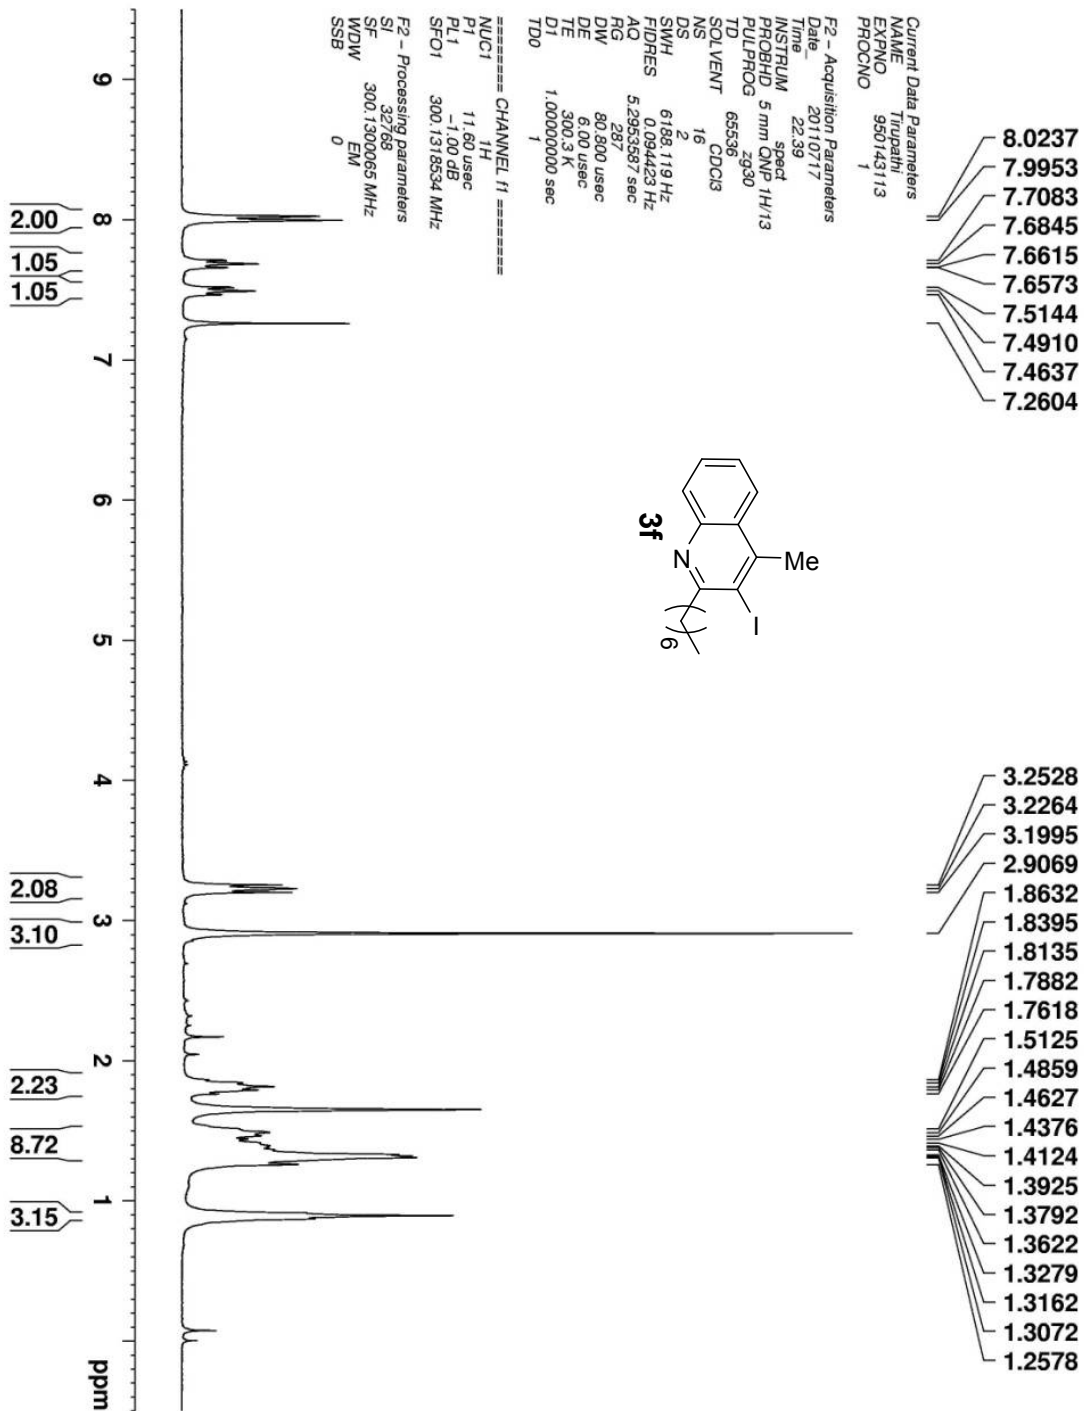



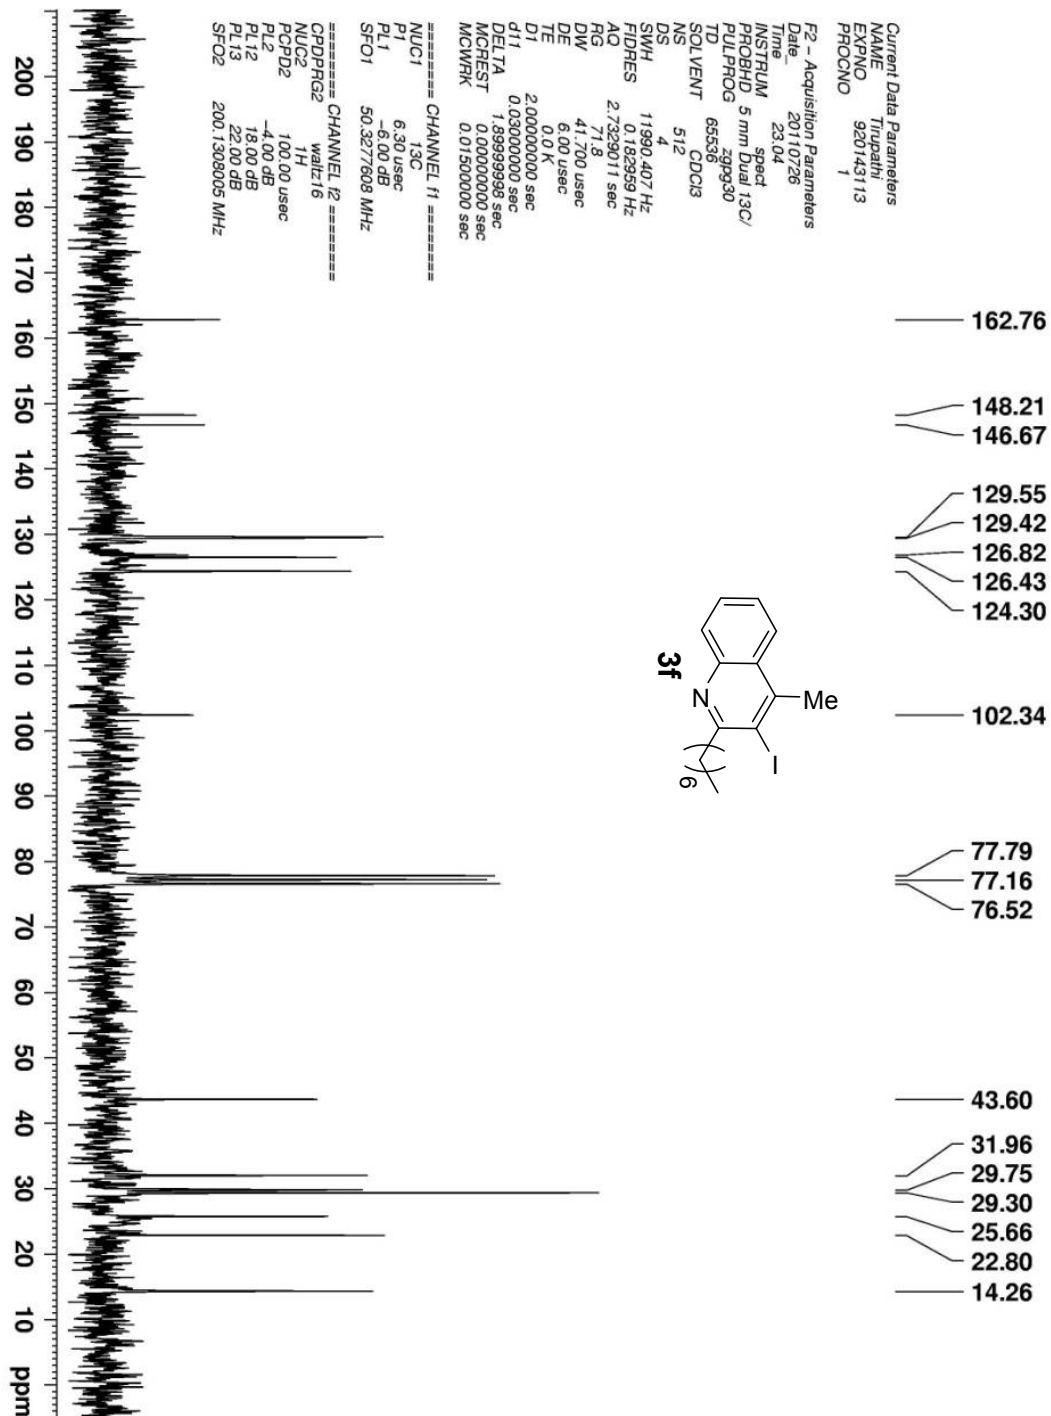

Sample Name 143-113-SP-11 Position Vial 96 Instrument Name Instrument 1 User Name  
Inj Vol -1 InjPosition SampleType Sample IRM Calibration Status  
Data Filename 143-113-SP-11\_0018A.ACQ Method 150\_3000\_FULL\_SCAN\_ Comment Acquired Time 8/4/2011 11:53:00 AM  
Success

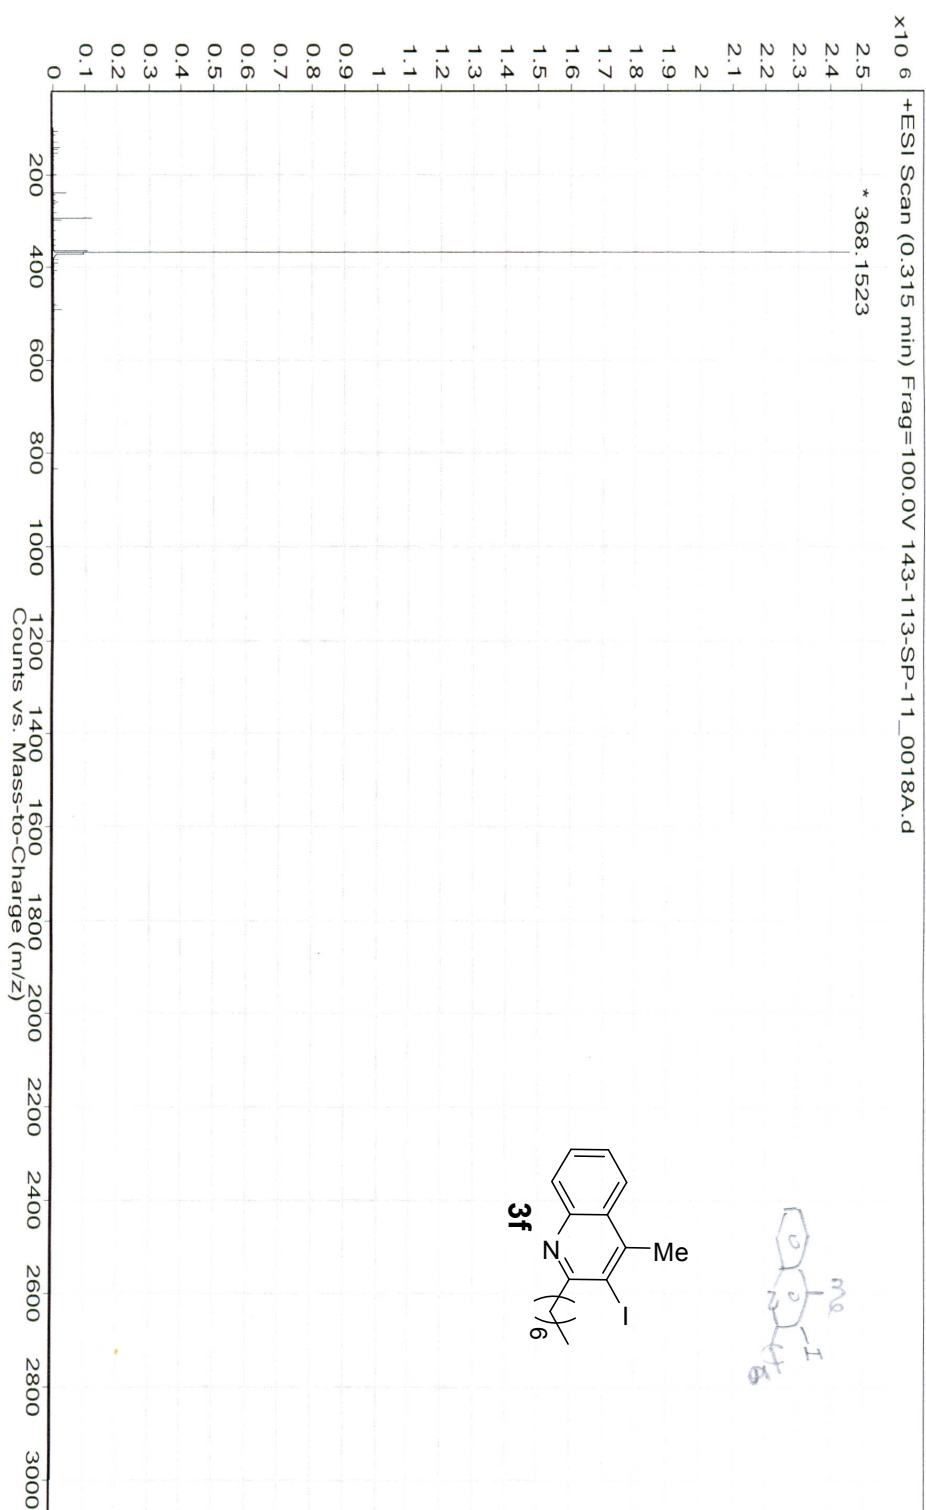

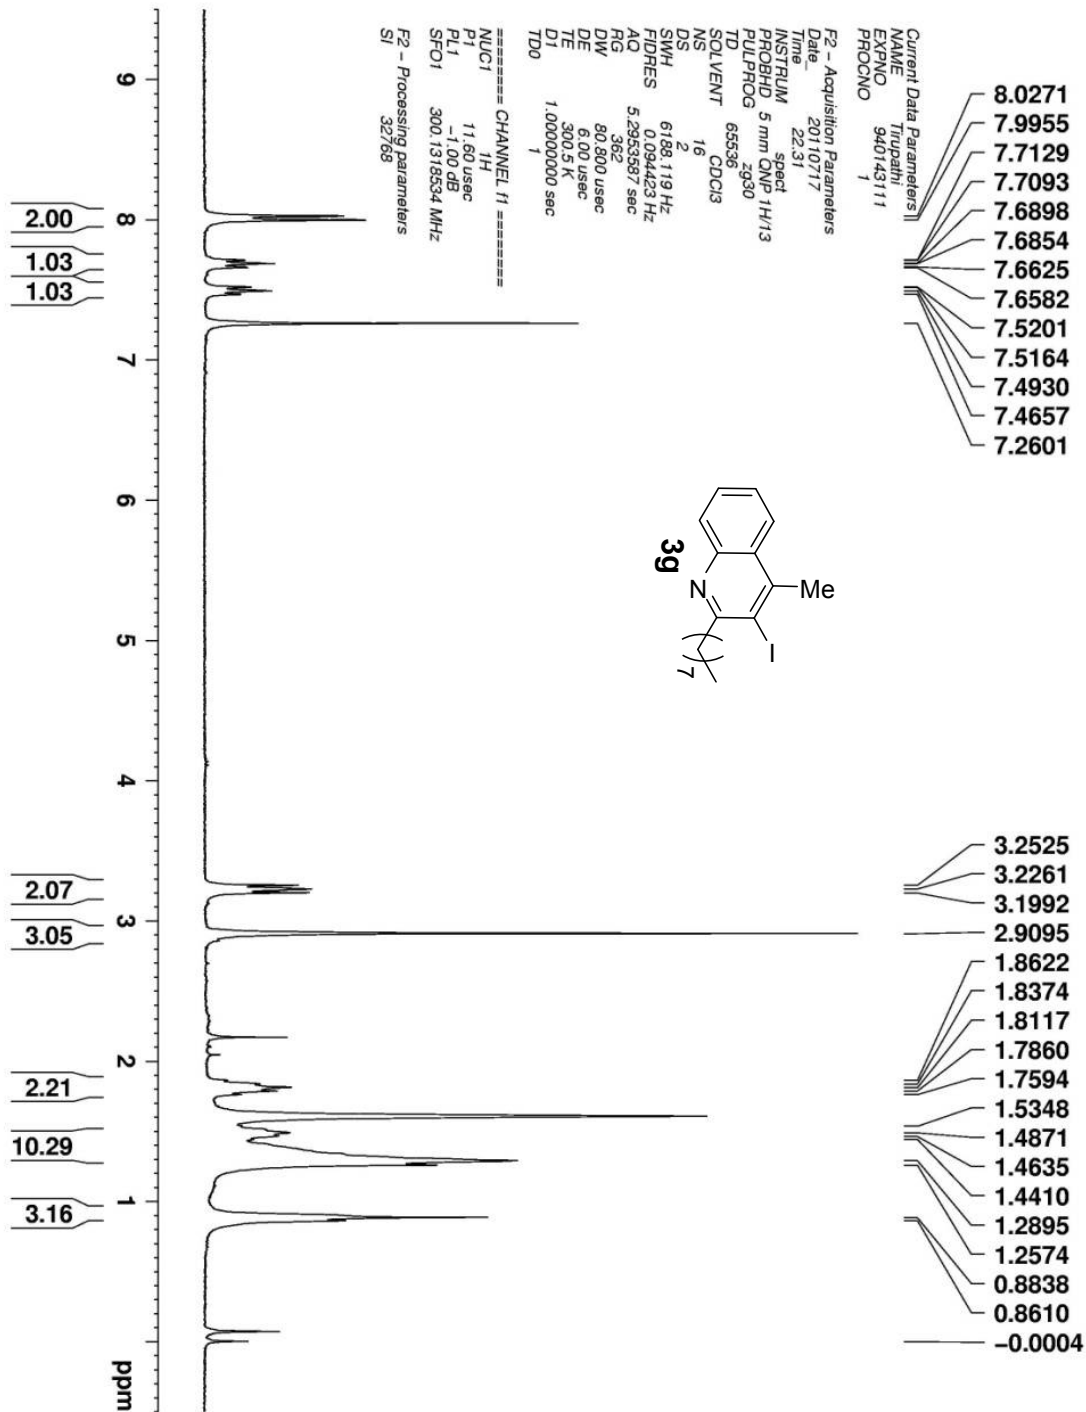

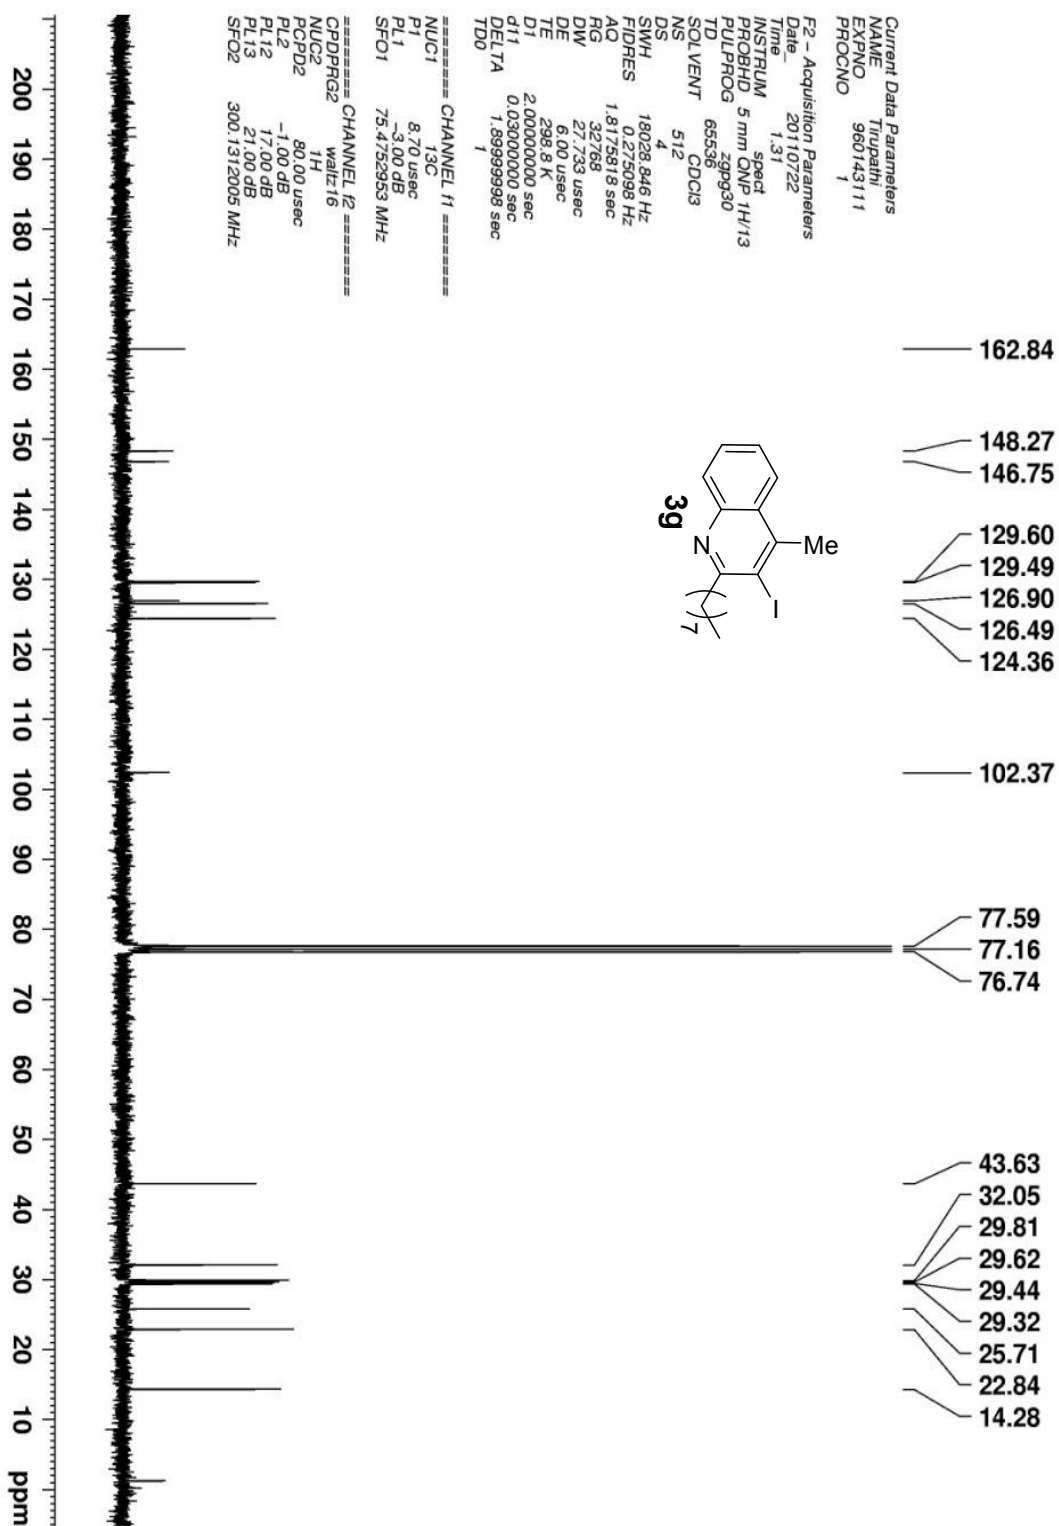

|               |                     |             |                     |                 |              |                        |                      |
|---------------|---------------------|-------------|---------------------|-----------------|--------------|------------------------|----------------------|
| Sample Name   | 143-111-SP-1        | Position    | Vial 44             | Instrument Name | Instrument 1 | User Name              |                      |
| Inj Vol       | -1                  | InjPosition |                     | SampleType      | Sample       | IRM Calibration Status | Success              |
| Data Filename | 143-111-SP-1_009A.d | Acq Method  | 150_3000_FULL_SCAN_ | Comment         |              | Acquired Time          | 8/2/2011 11:33:51 AM |

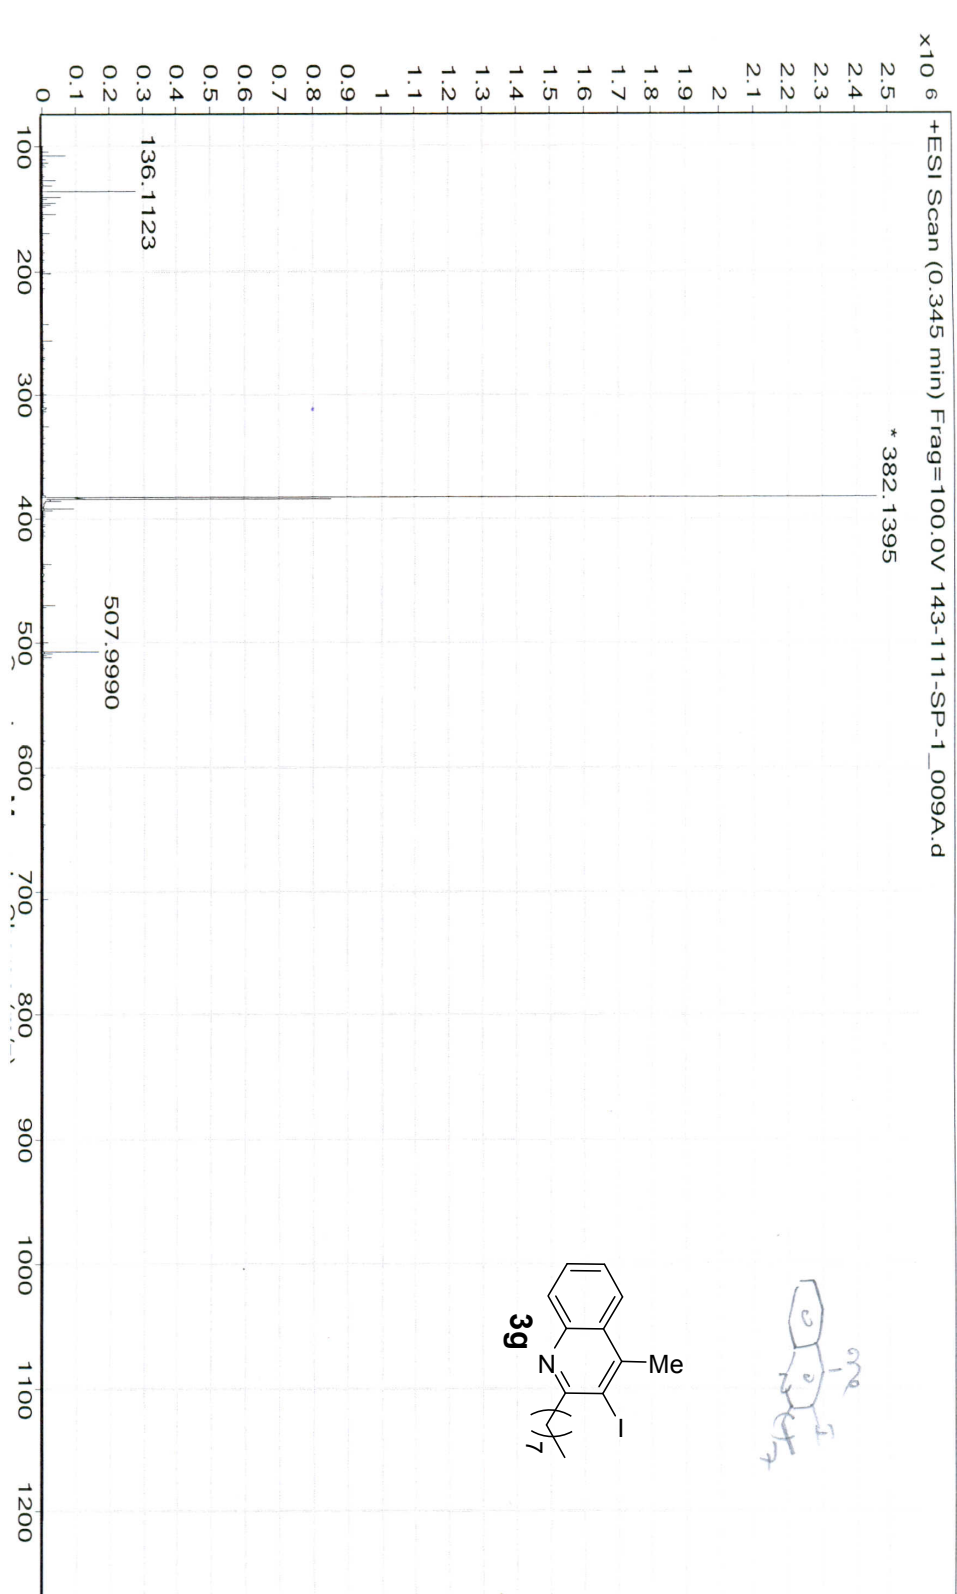

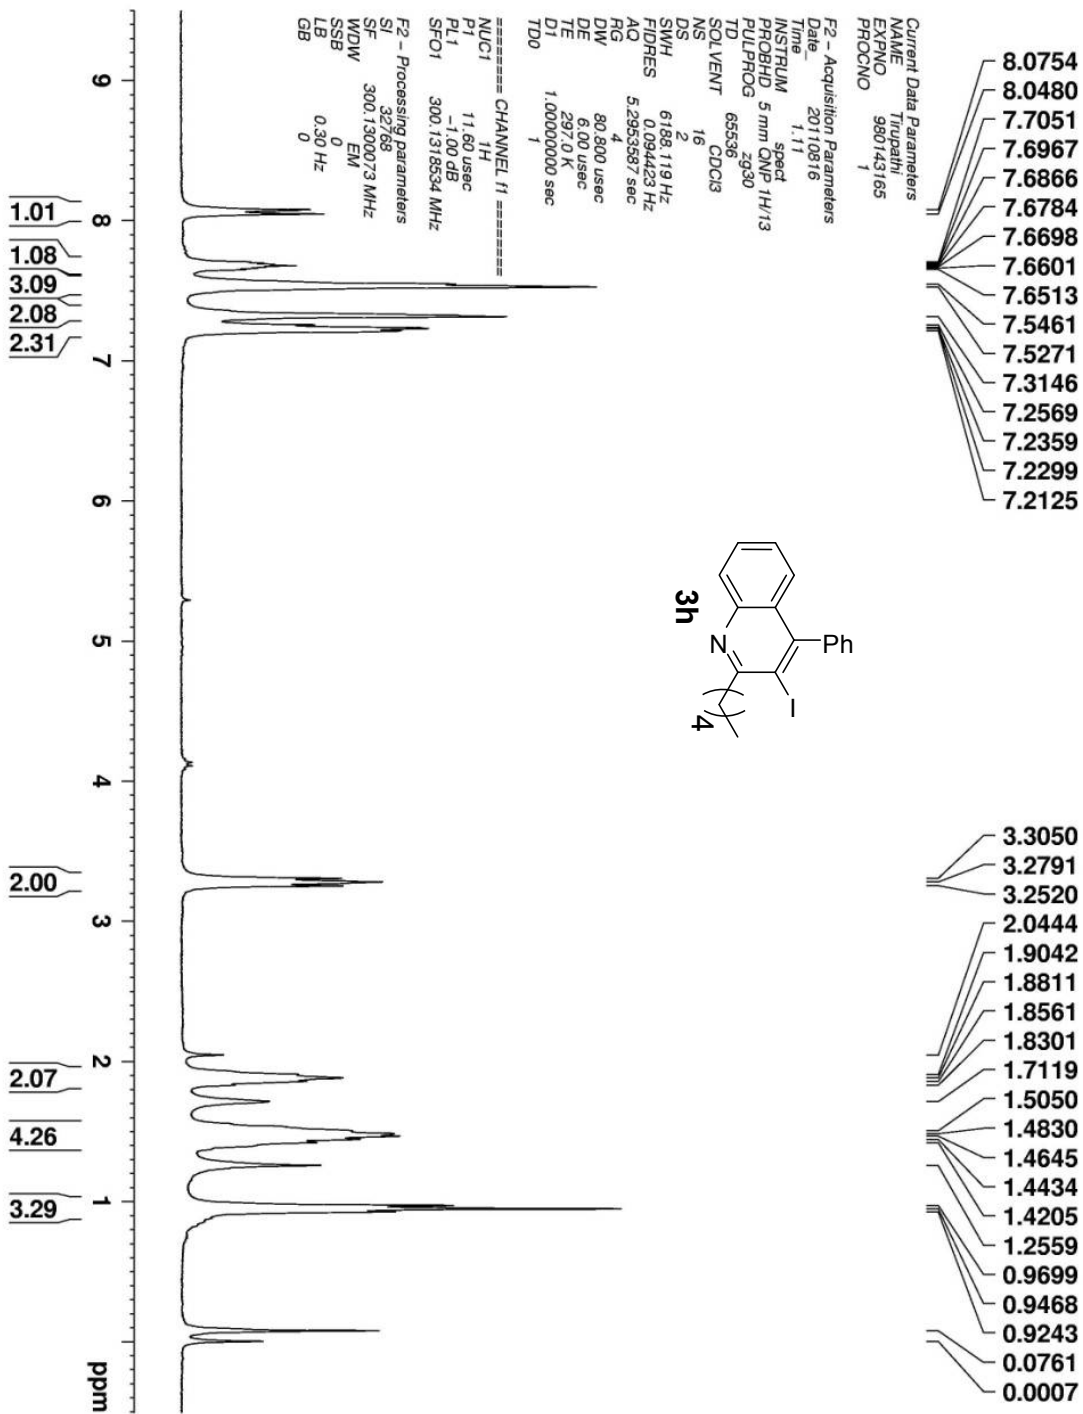

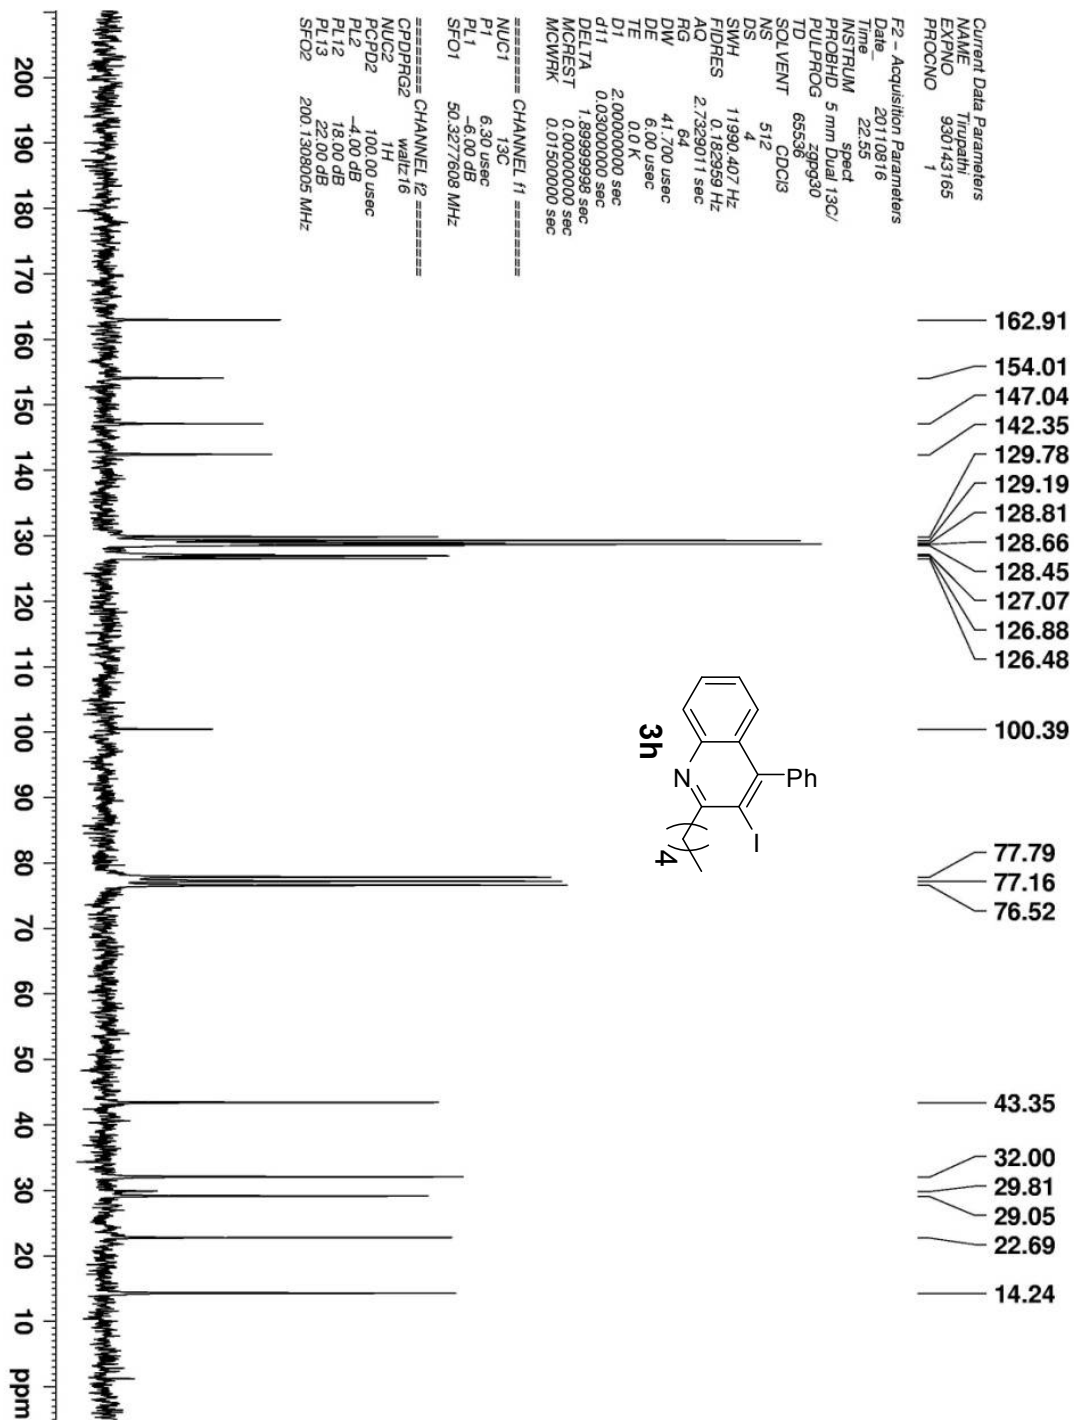

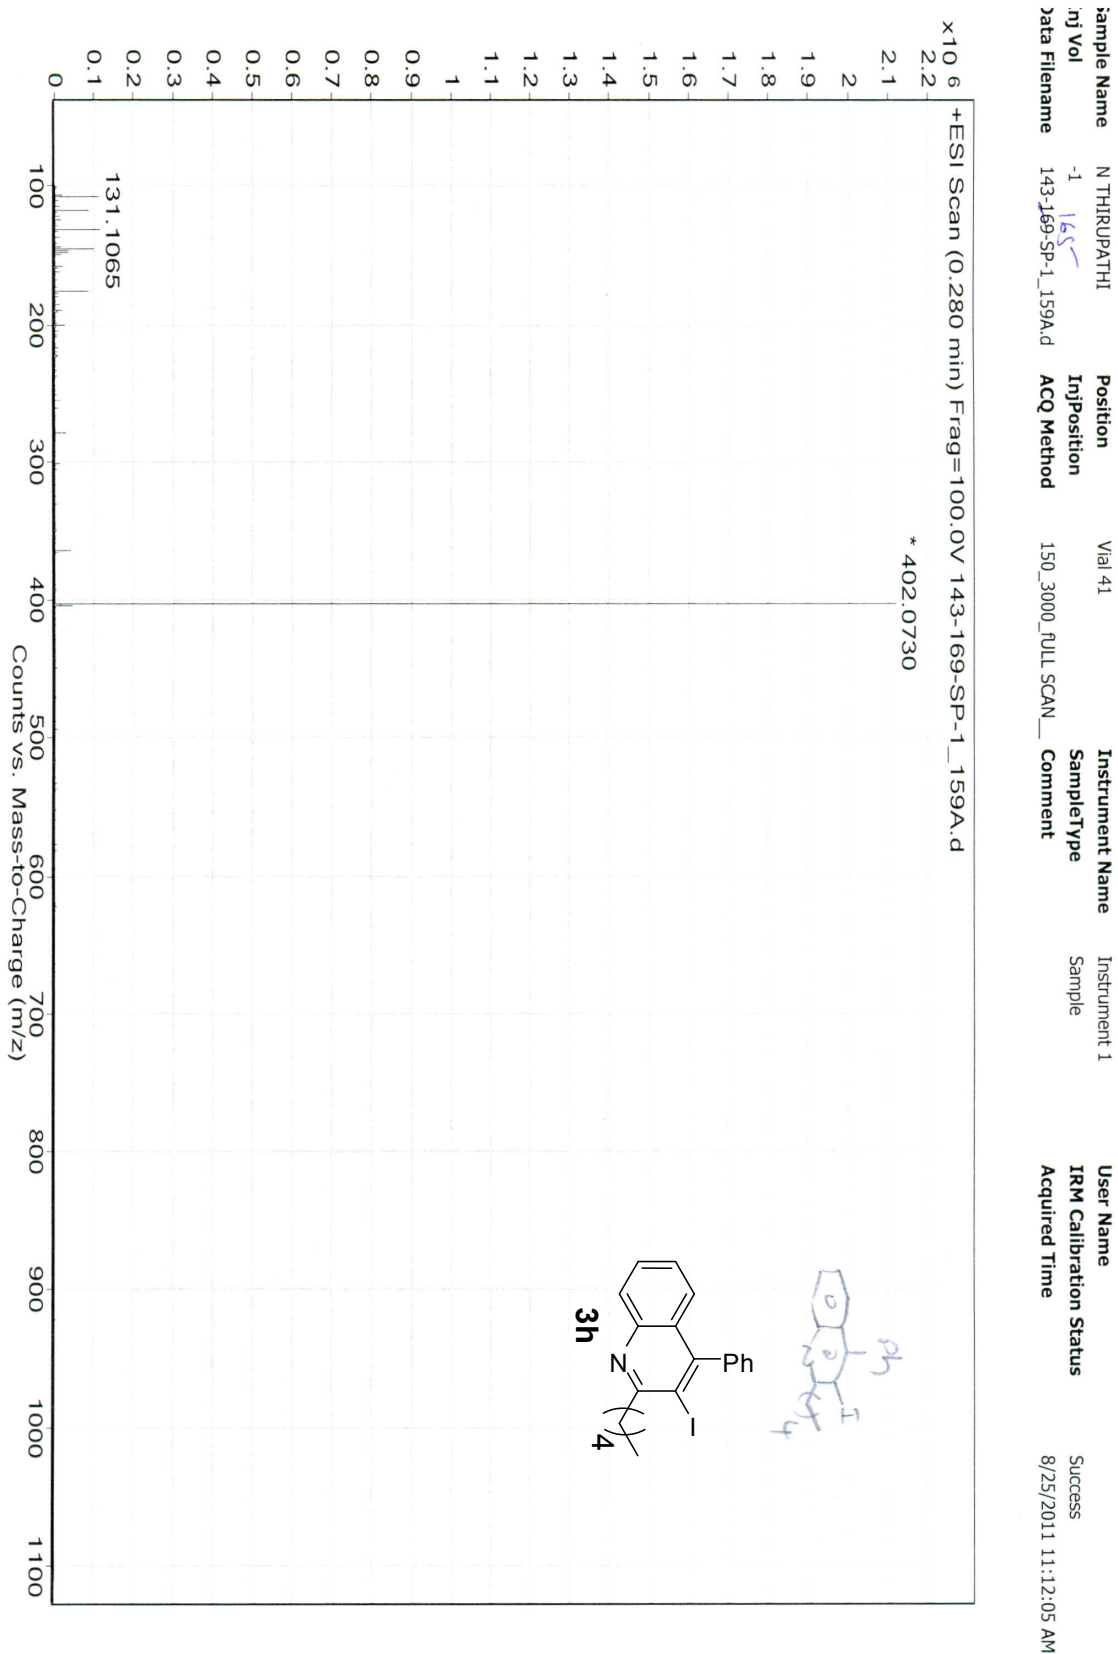



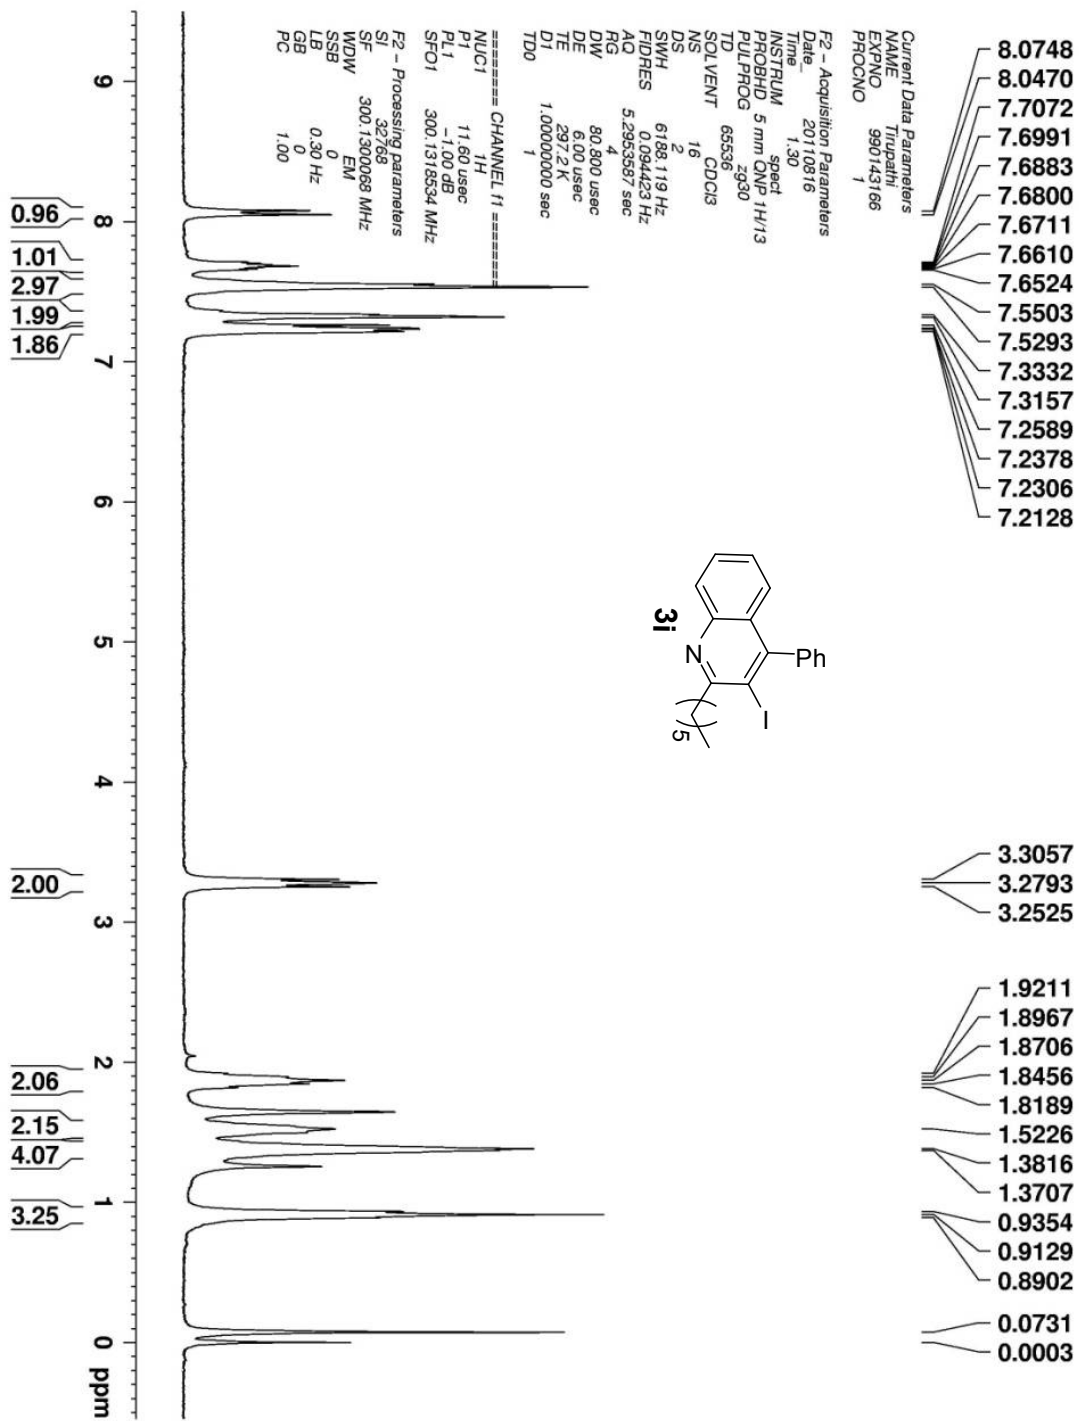

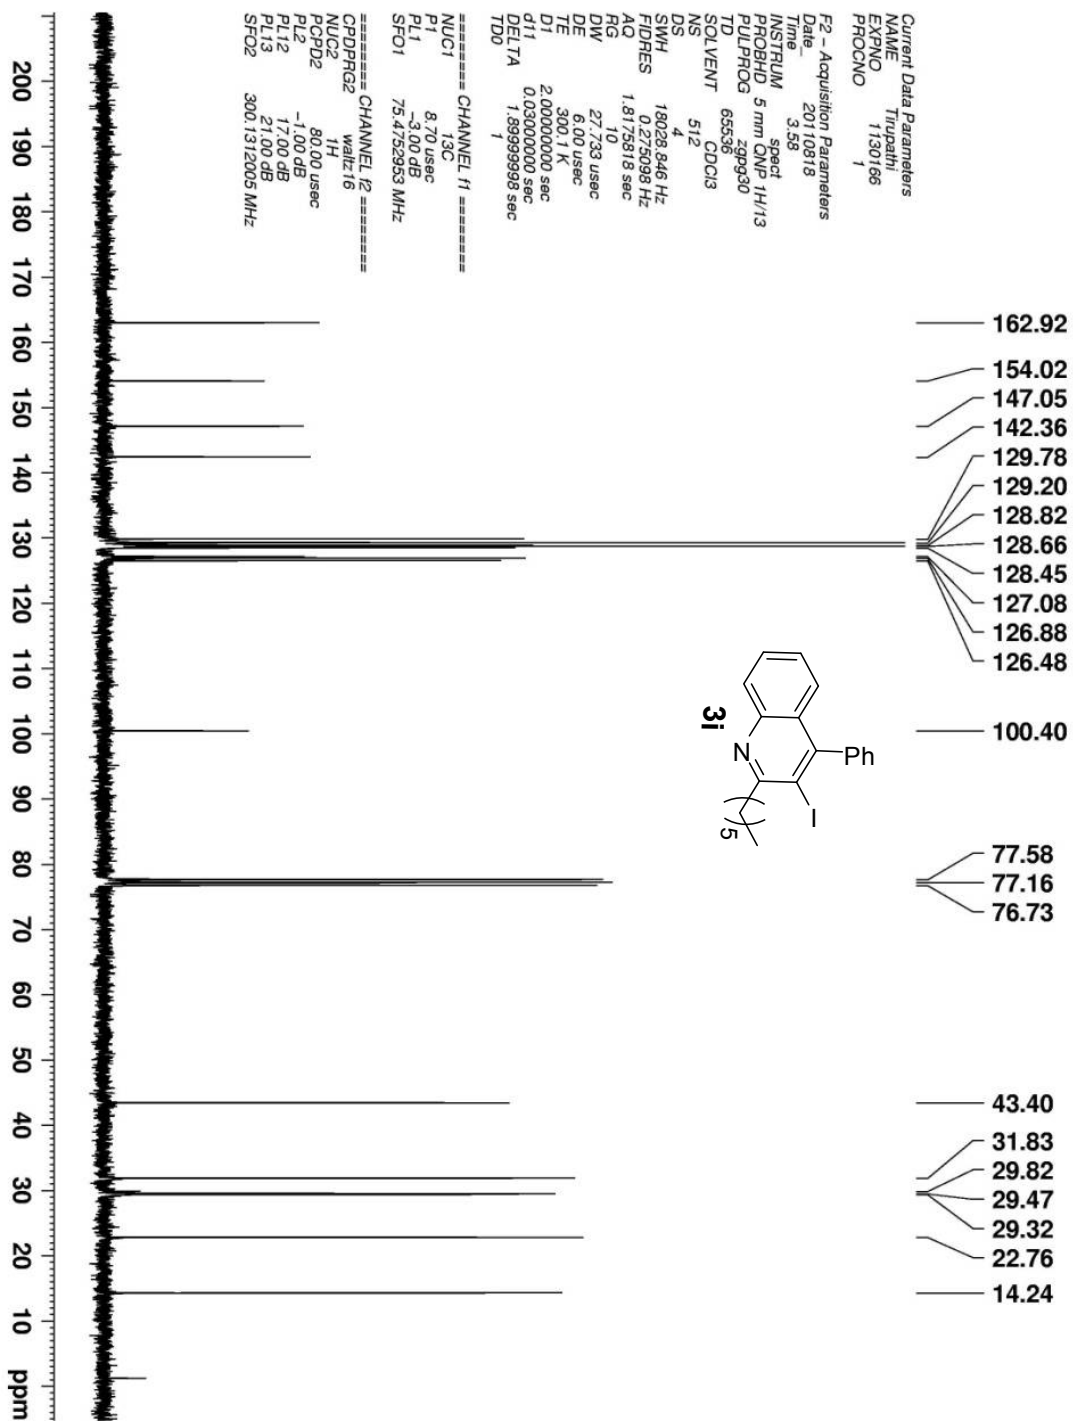

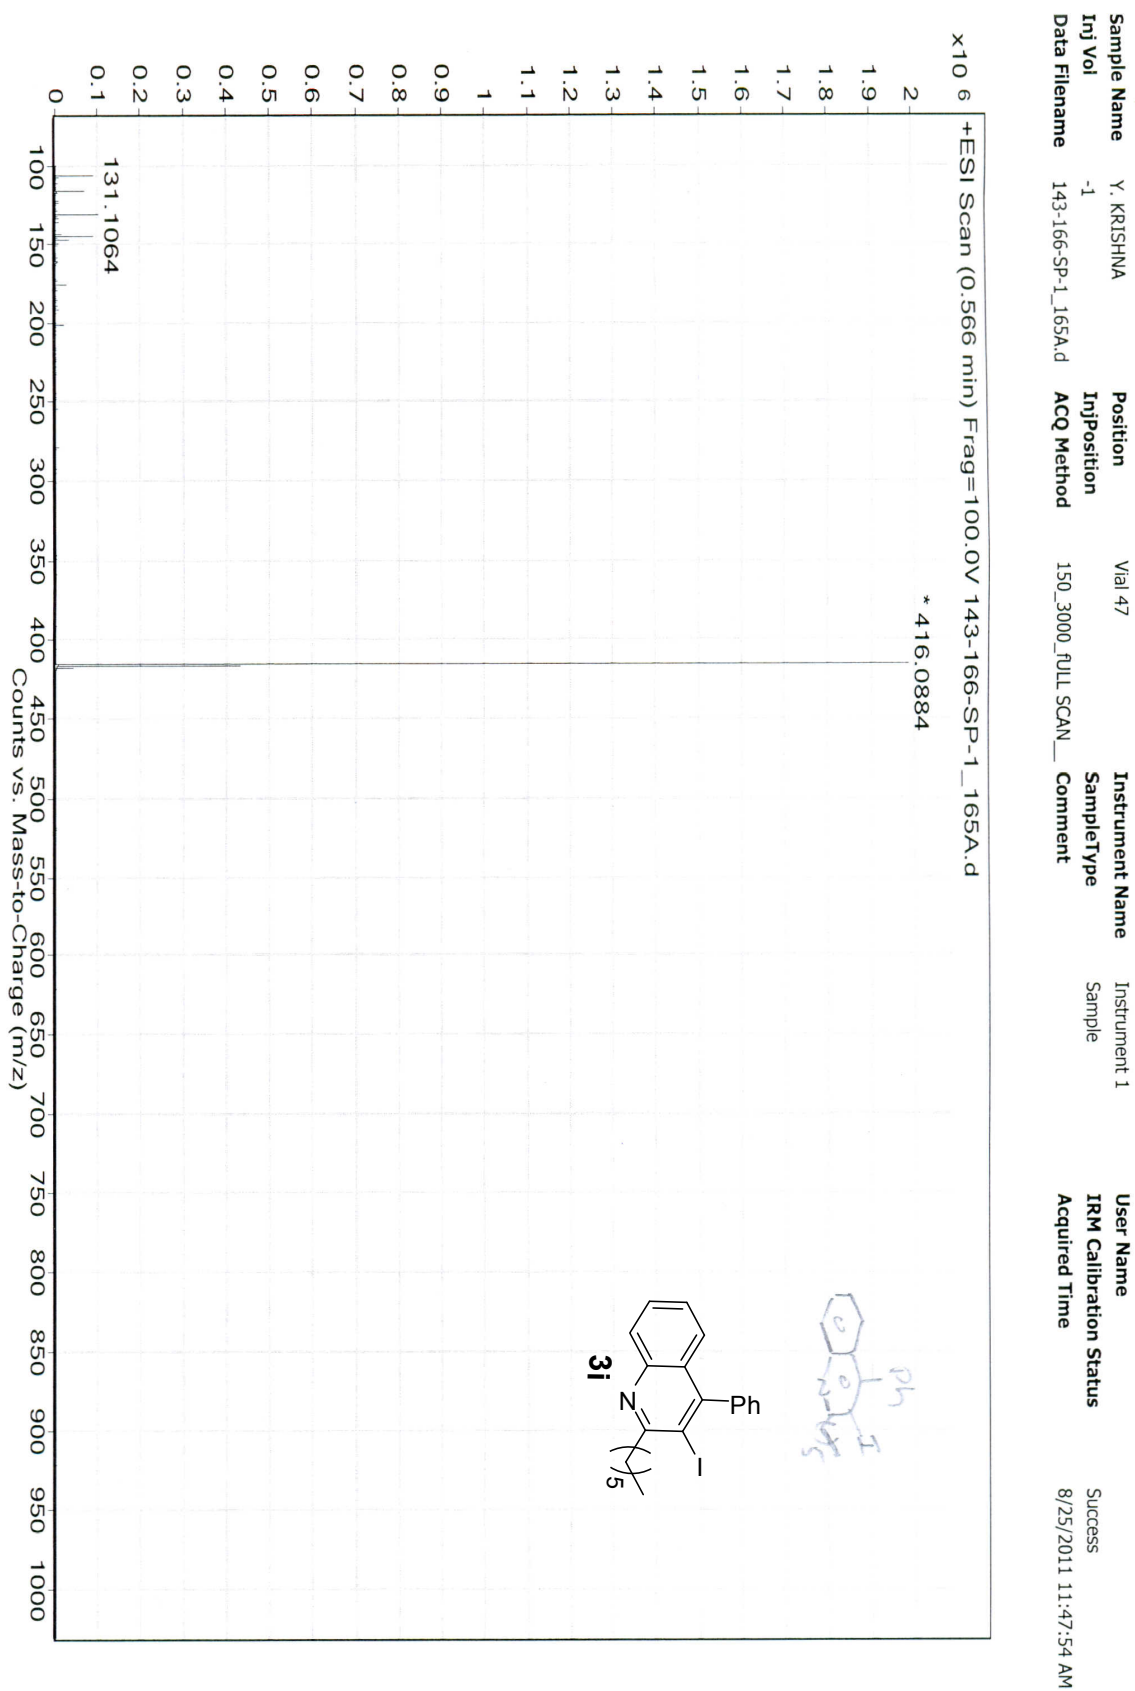

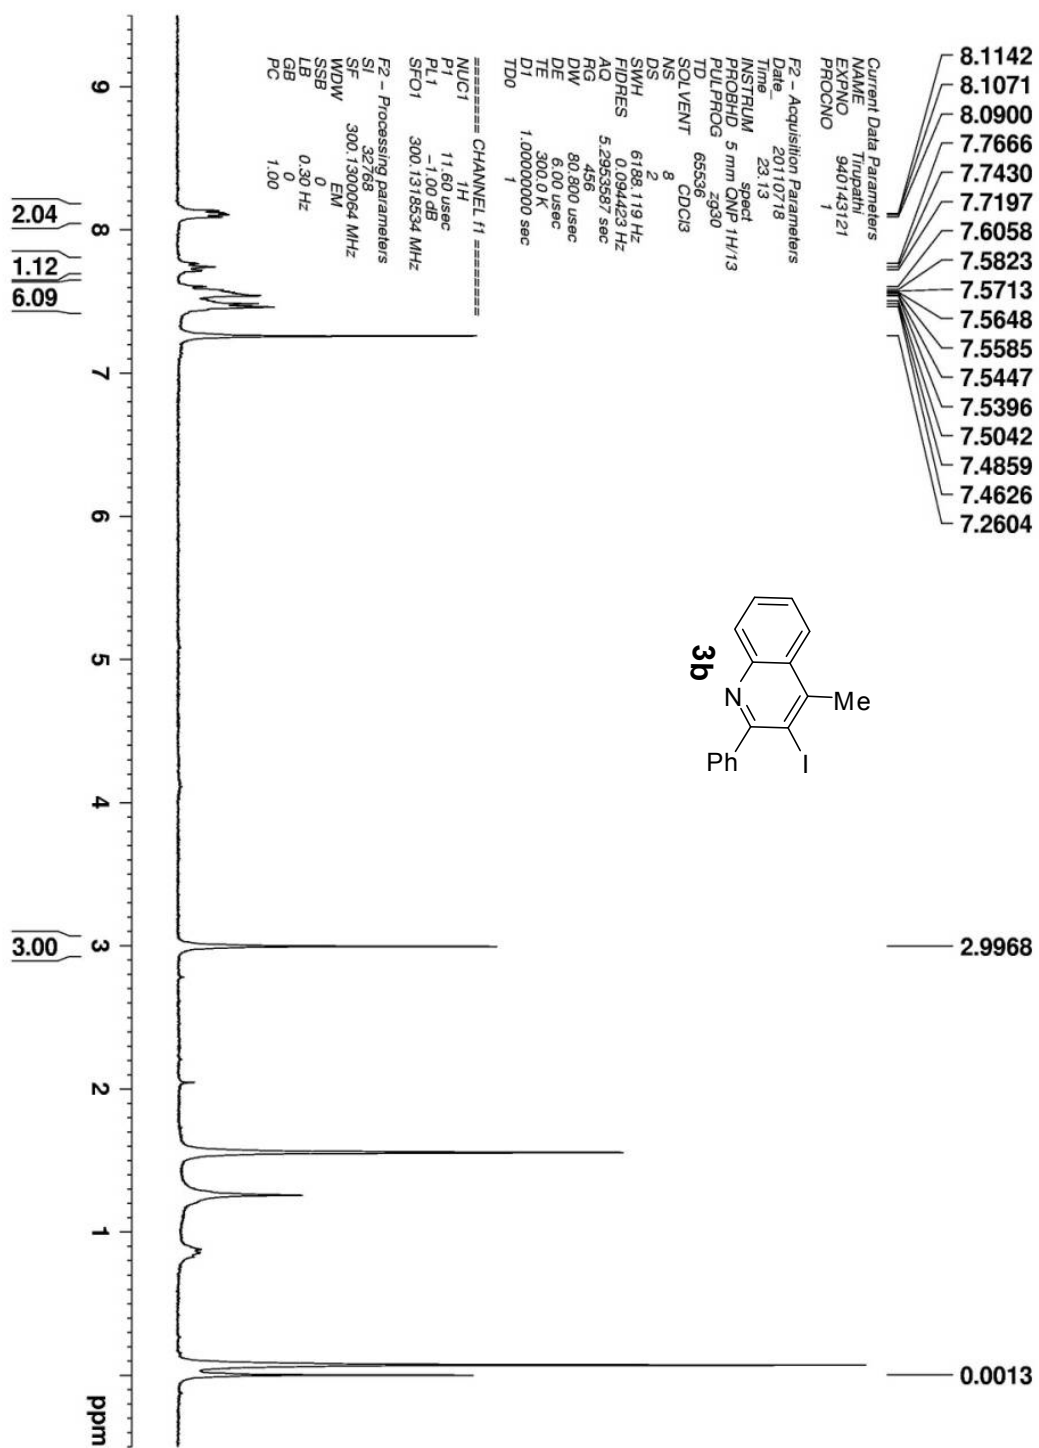

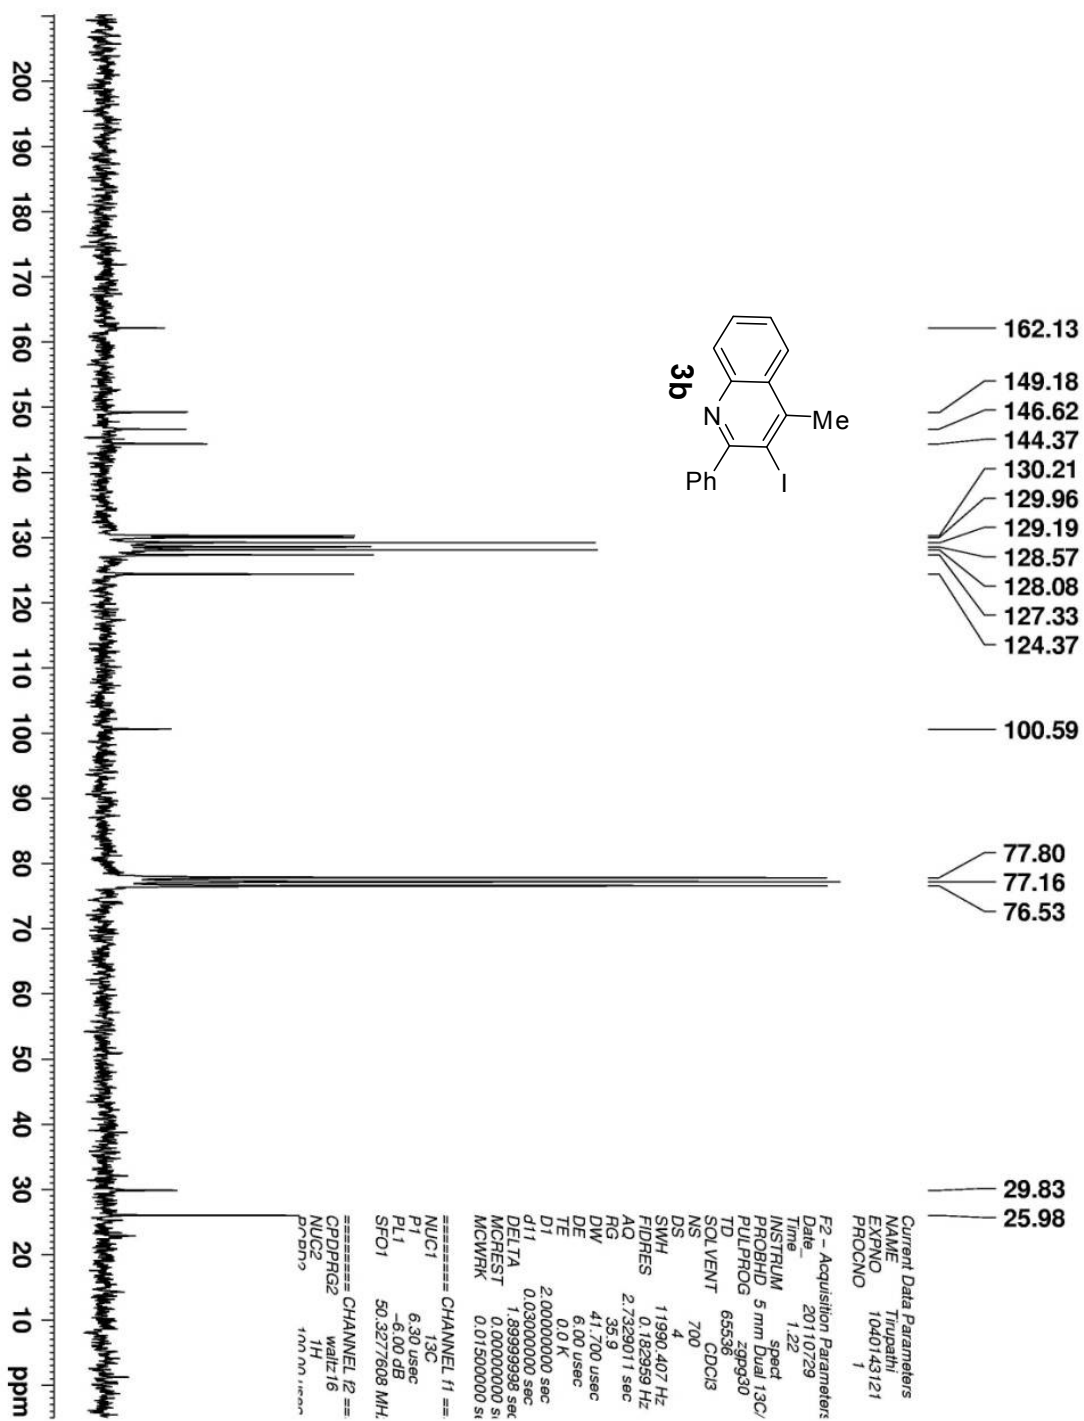

Sample Name 143-121-SP-2 Position Vial 41 Instrument Name Instrument 1 User Name  
Inj Vol -1 InjPosition SampleType Sample IRM Calibration Status Success  
Data Filename 143-121-SP-2\_070A.d ACQ Method 150\_3000\_FULL\_SCAN\_ Comment 7/28/2011 12:35:27 PM

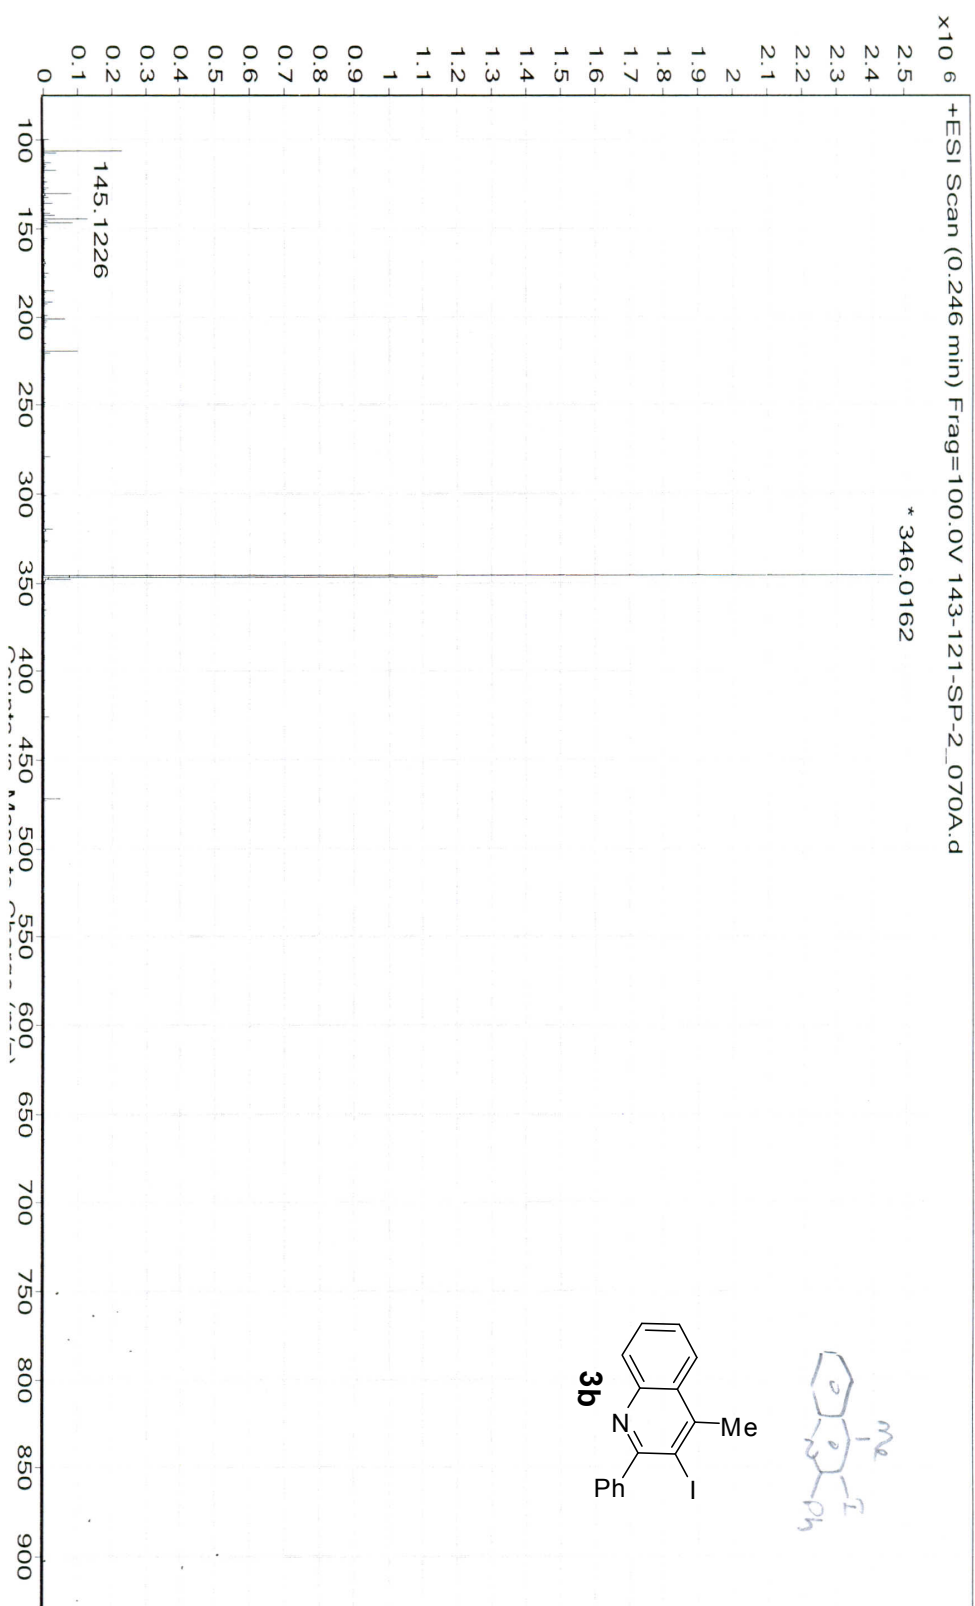

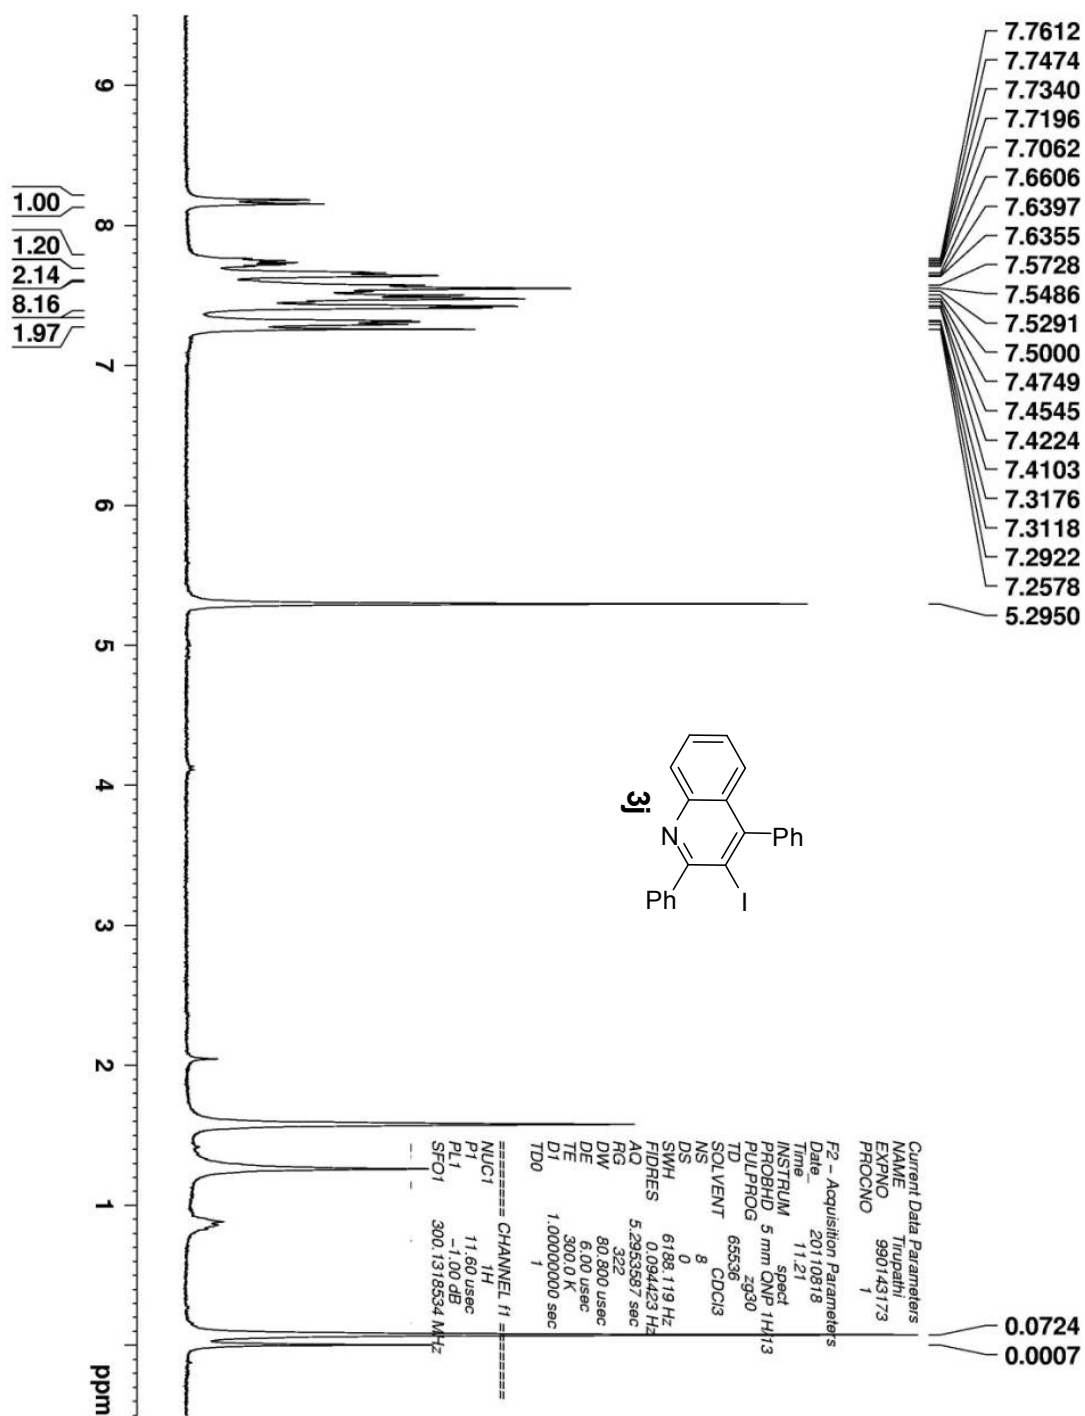

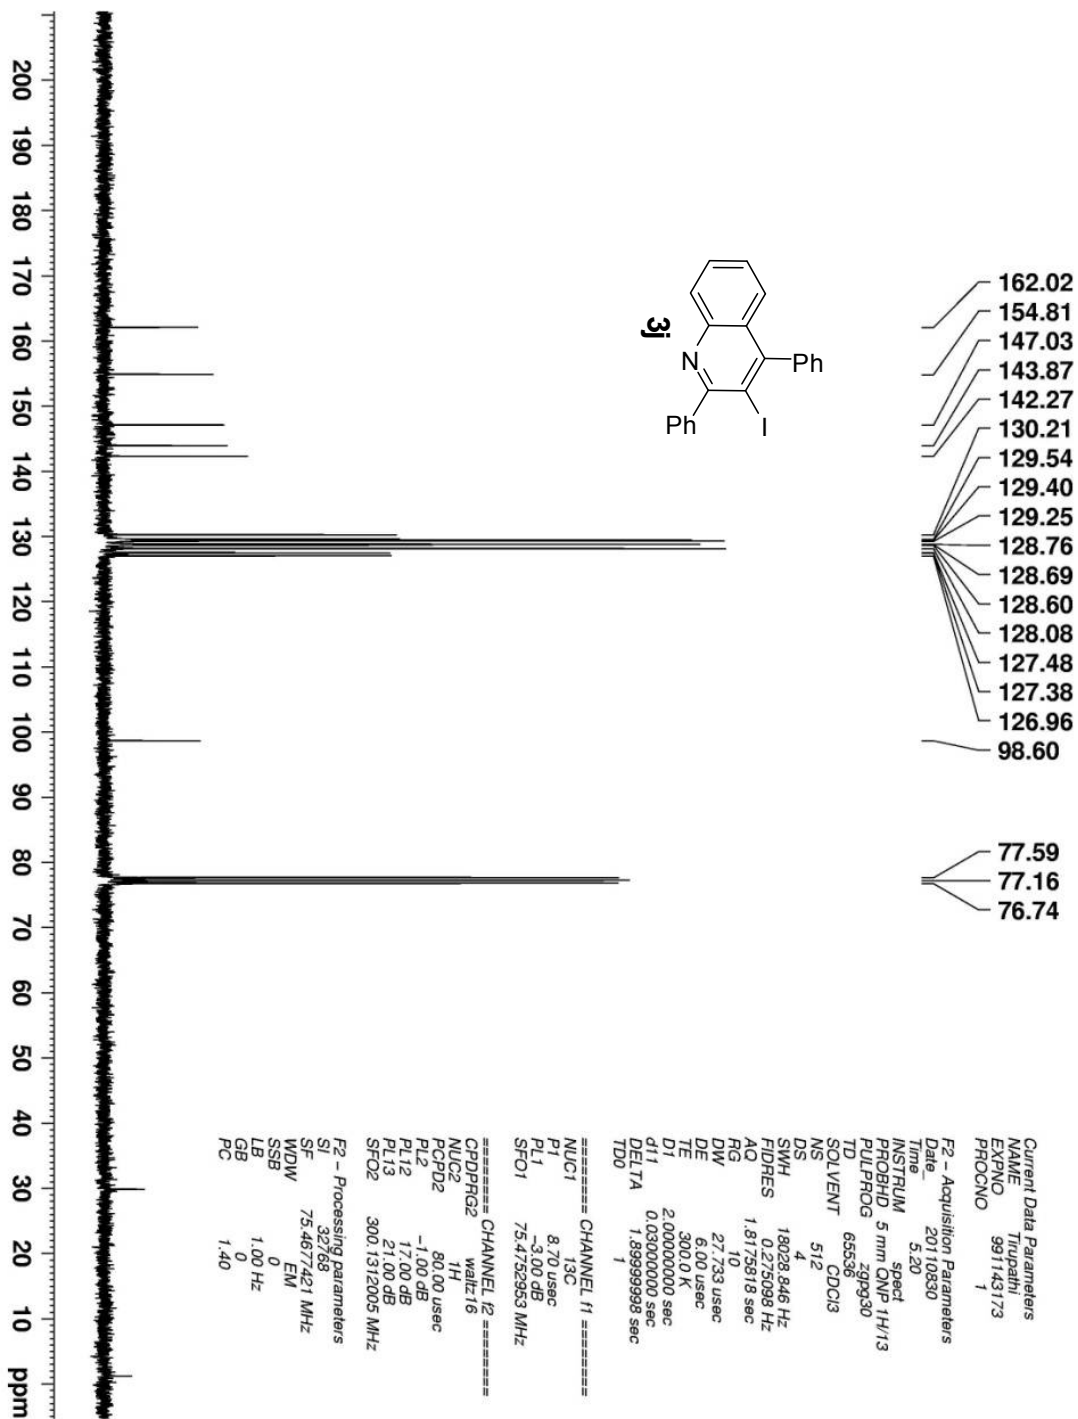



Sample Name 173-SP-1 Position InjPosition Vial 73 Instrument Name Instrument 1 User Name  
Inj Vol -1 InjPosition SampleType Sample IRM Calibration Status Success  
Data Filename 150\_3000\_FULL\_SCAN\_Acq Method 150\_3000\_FULL\_SCAN Comment Acquired Time 9/1/2011 2:53:53 PM

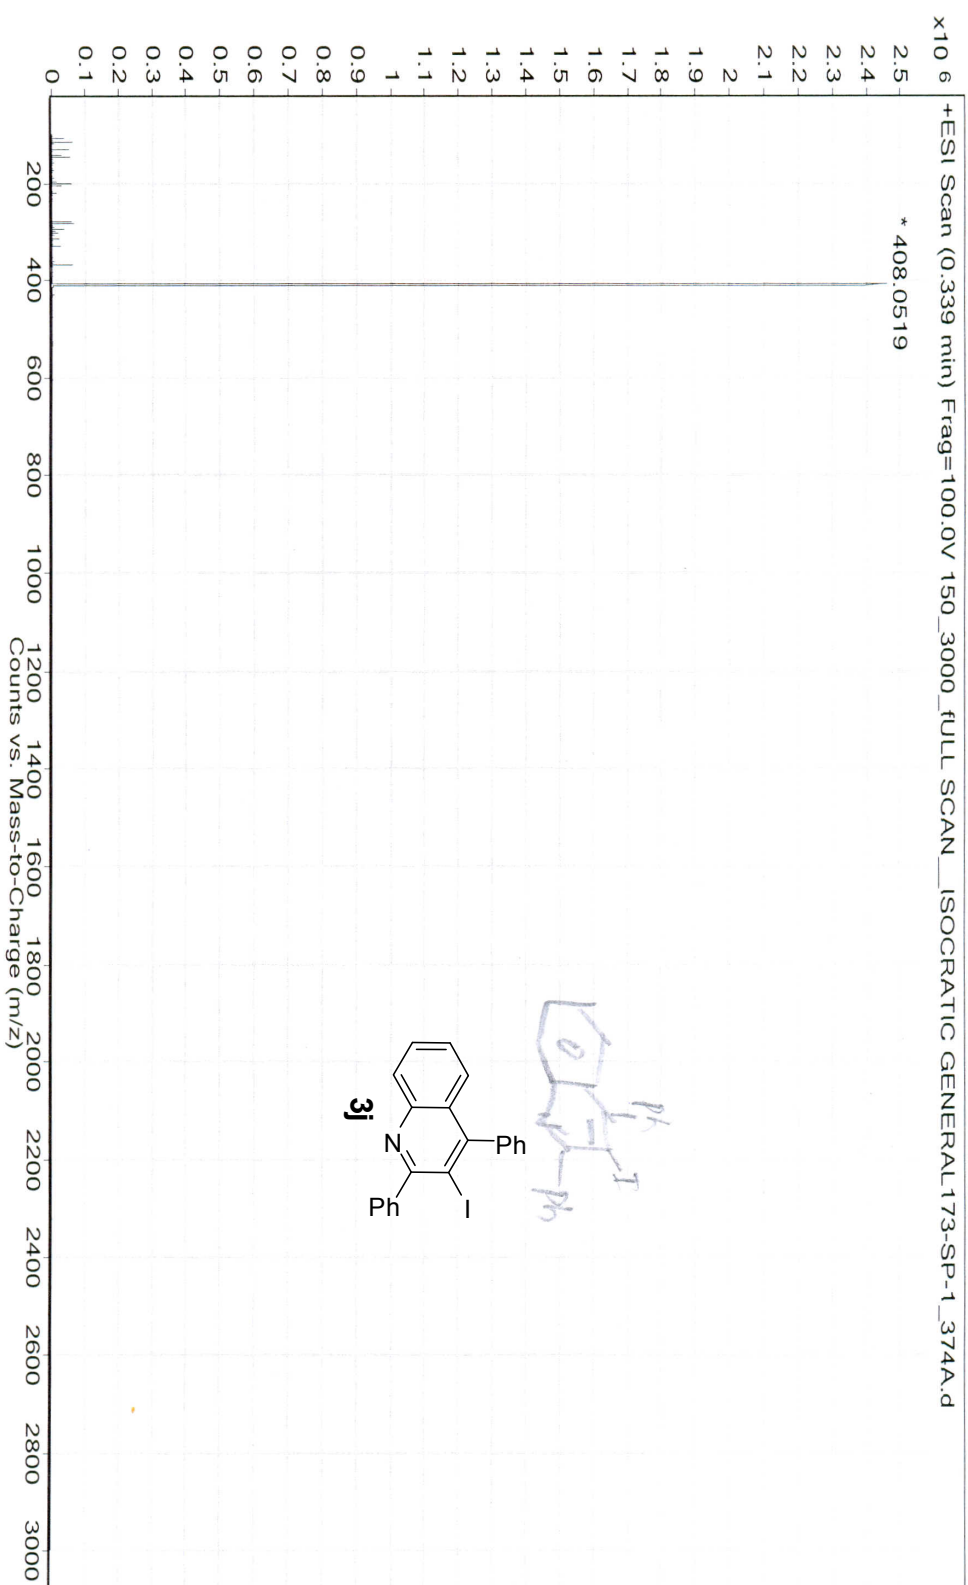

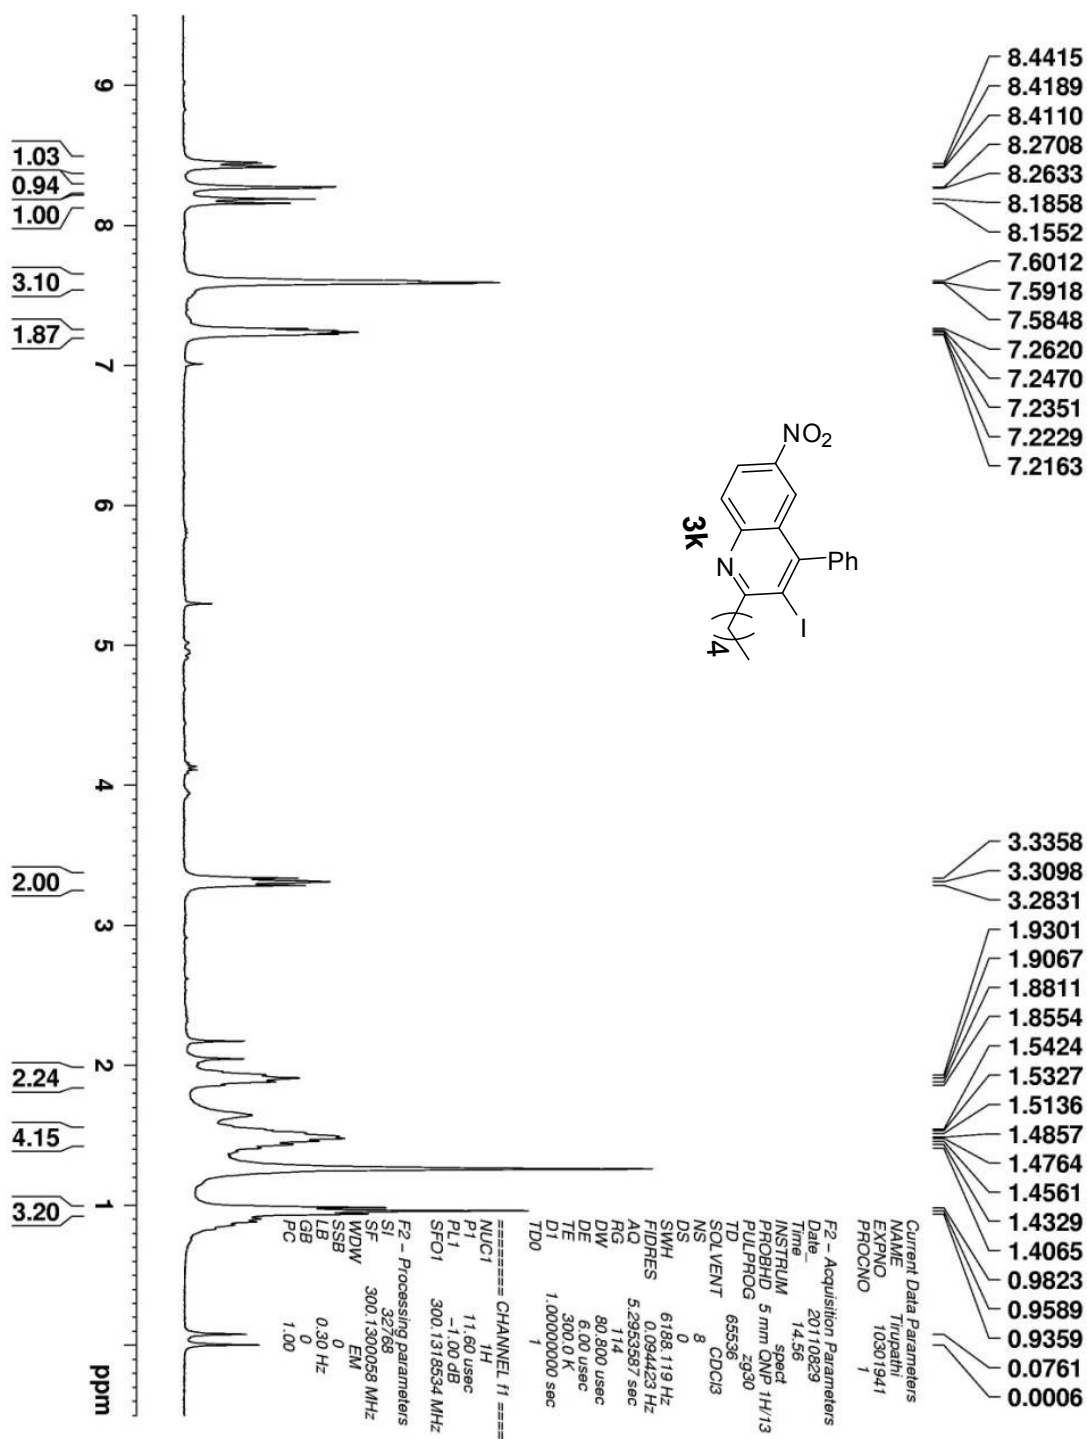

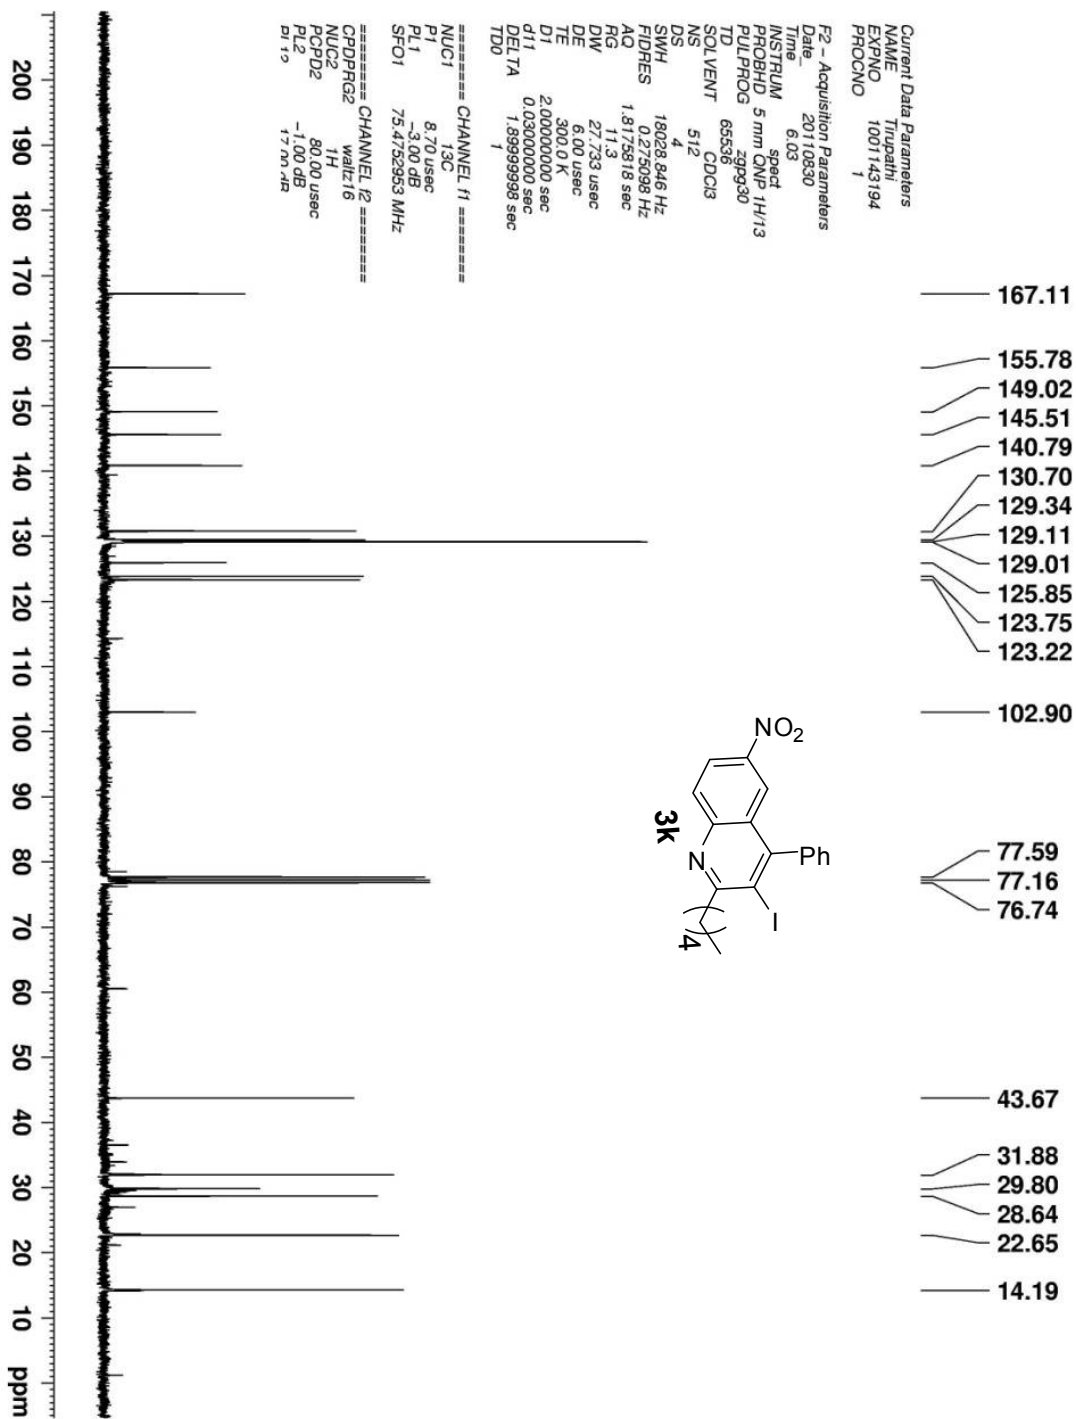

Sample Name 143-134-SP-1 Position InjPosition Vial 25 Instrument Name Instrument 1 User Name  
Inj Vol -1 InjPosition SampleType Sample IRM Calibration Status Success  
Data Filename 150\_3000\_FULL\_SCAN\_Acq Method 150\_3000\_FULL\_SCAN\_Comment Acquired Time 9/2/2011 2:57:49 PM

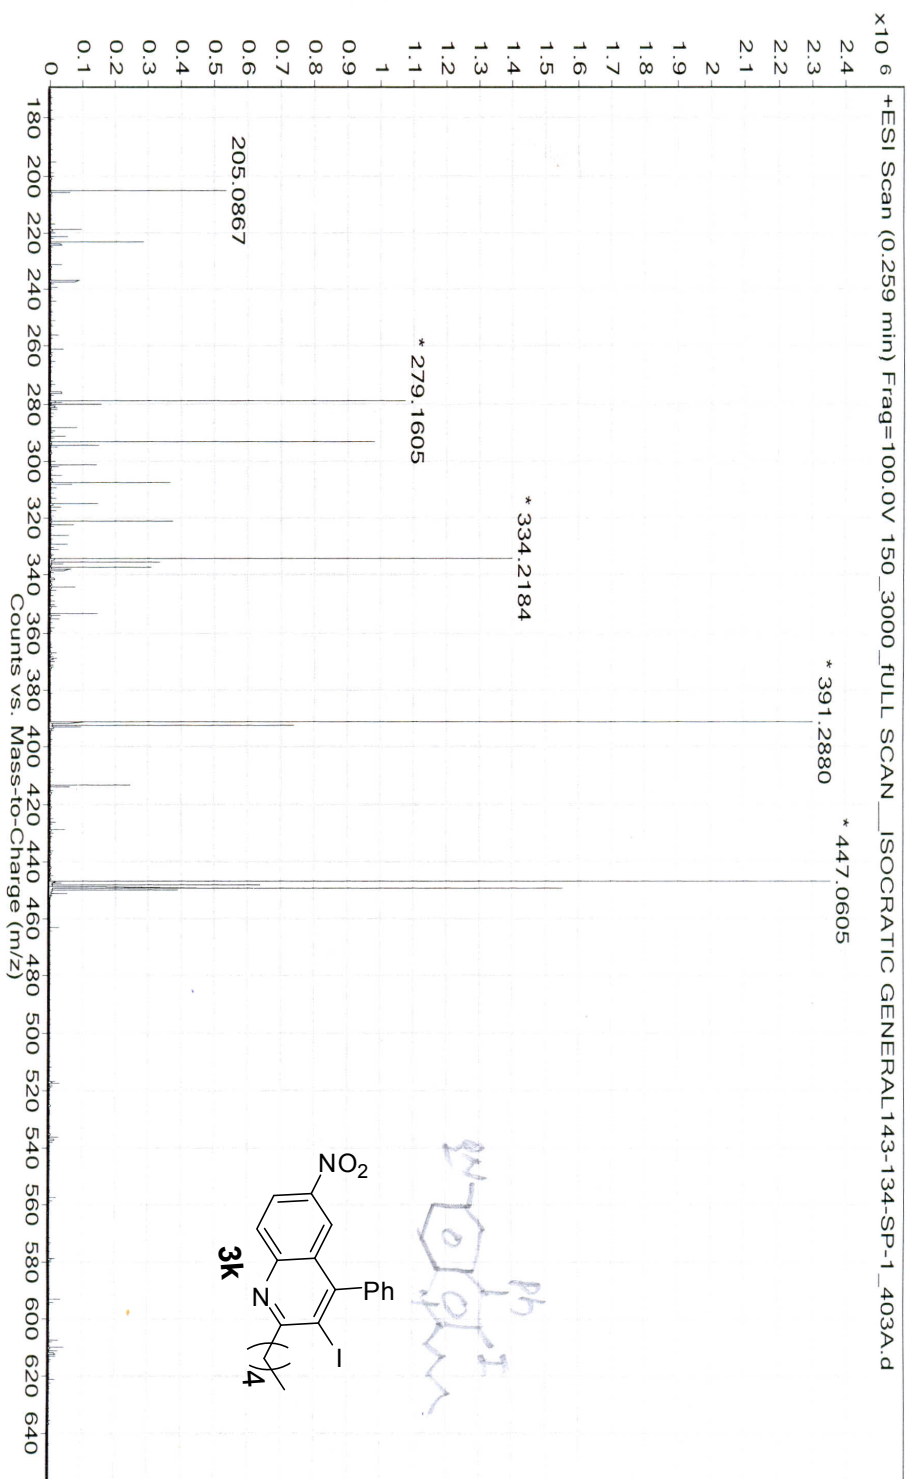

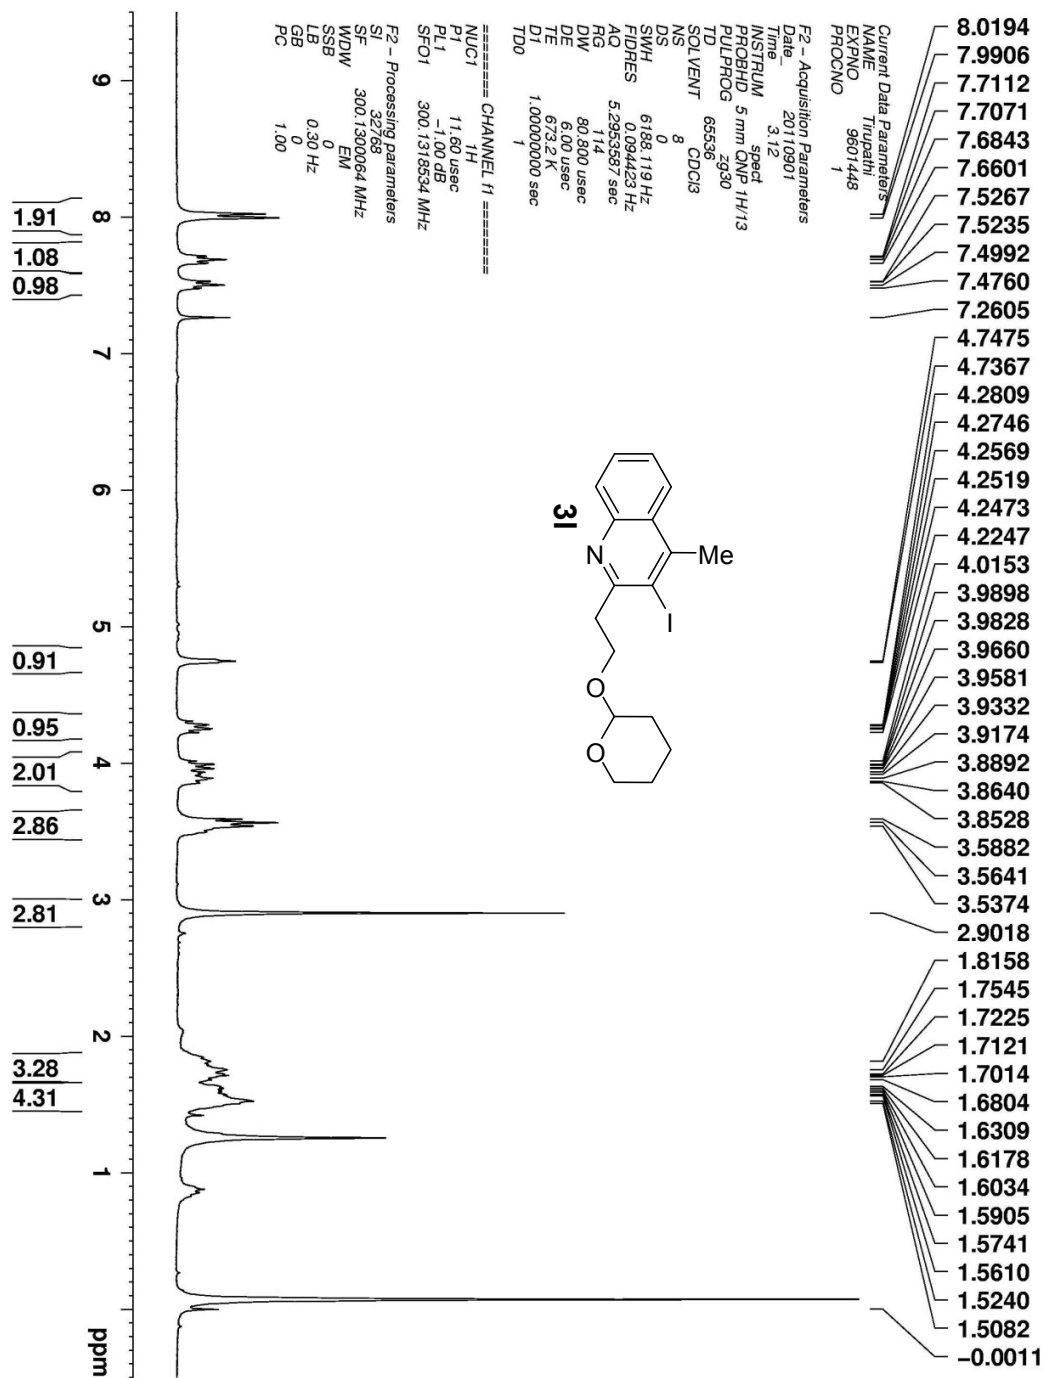

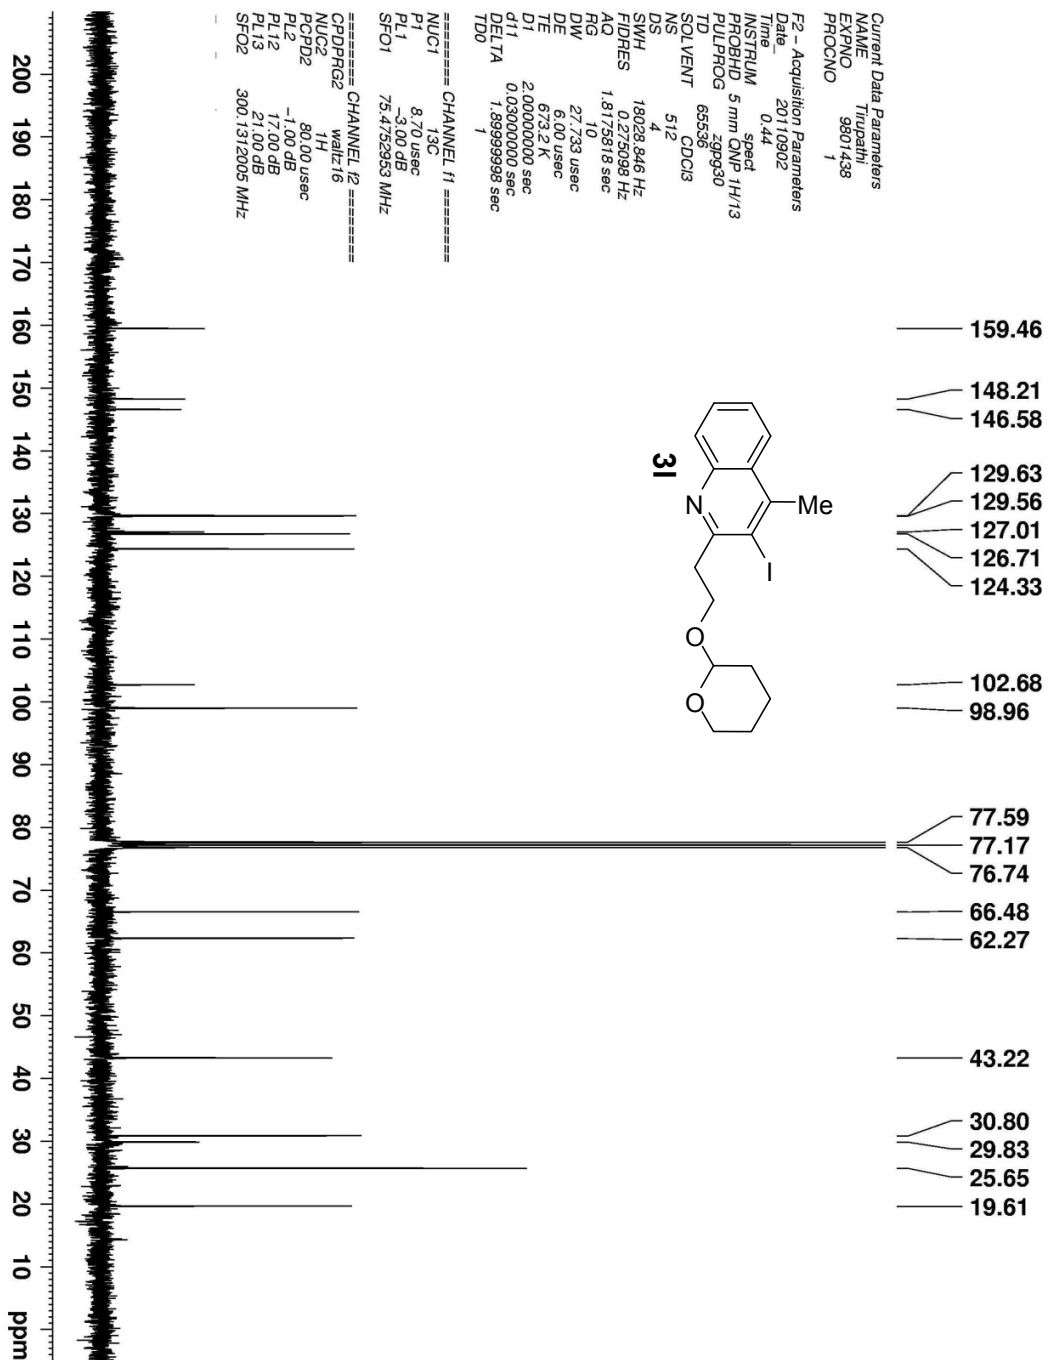

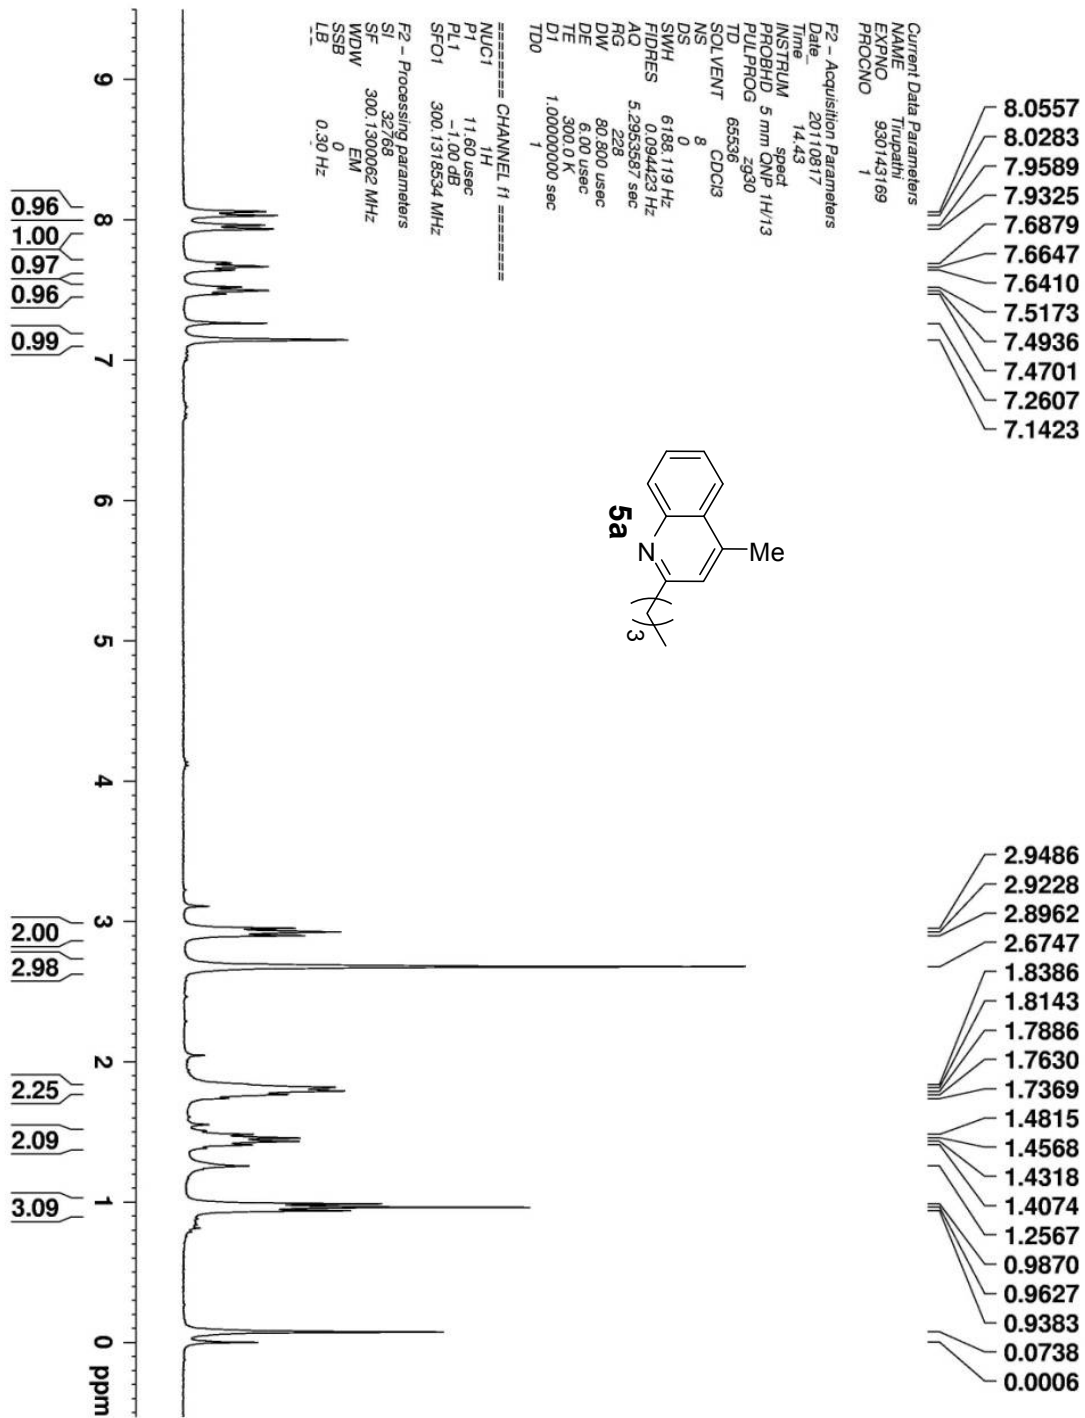

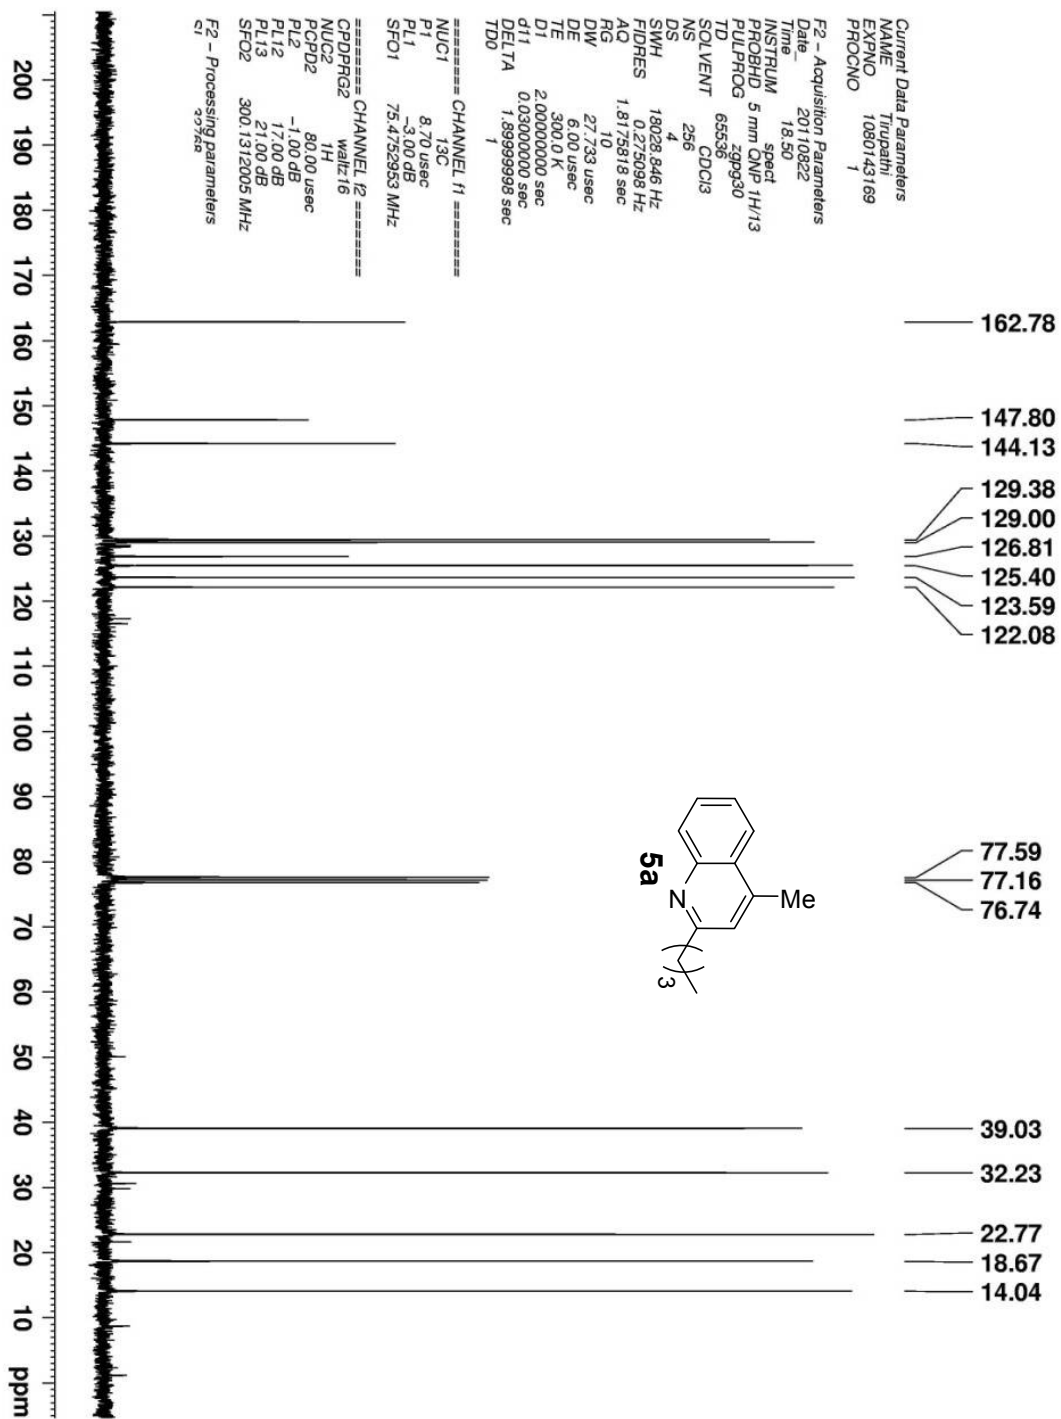



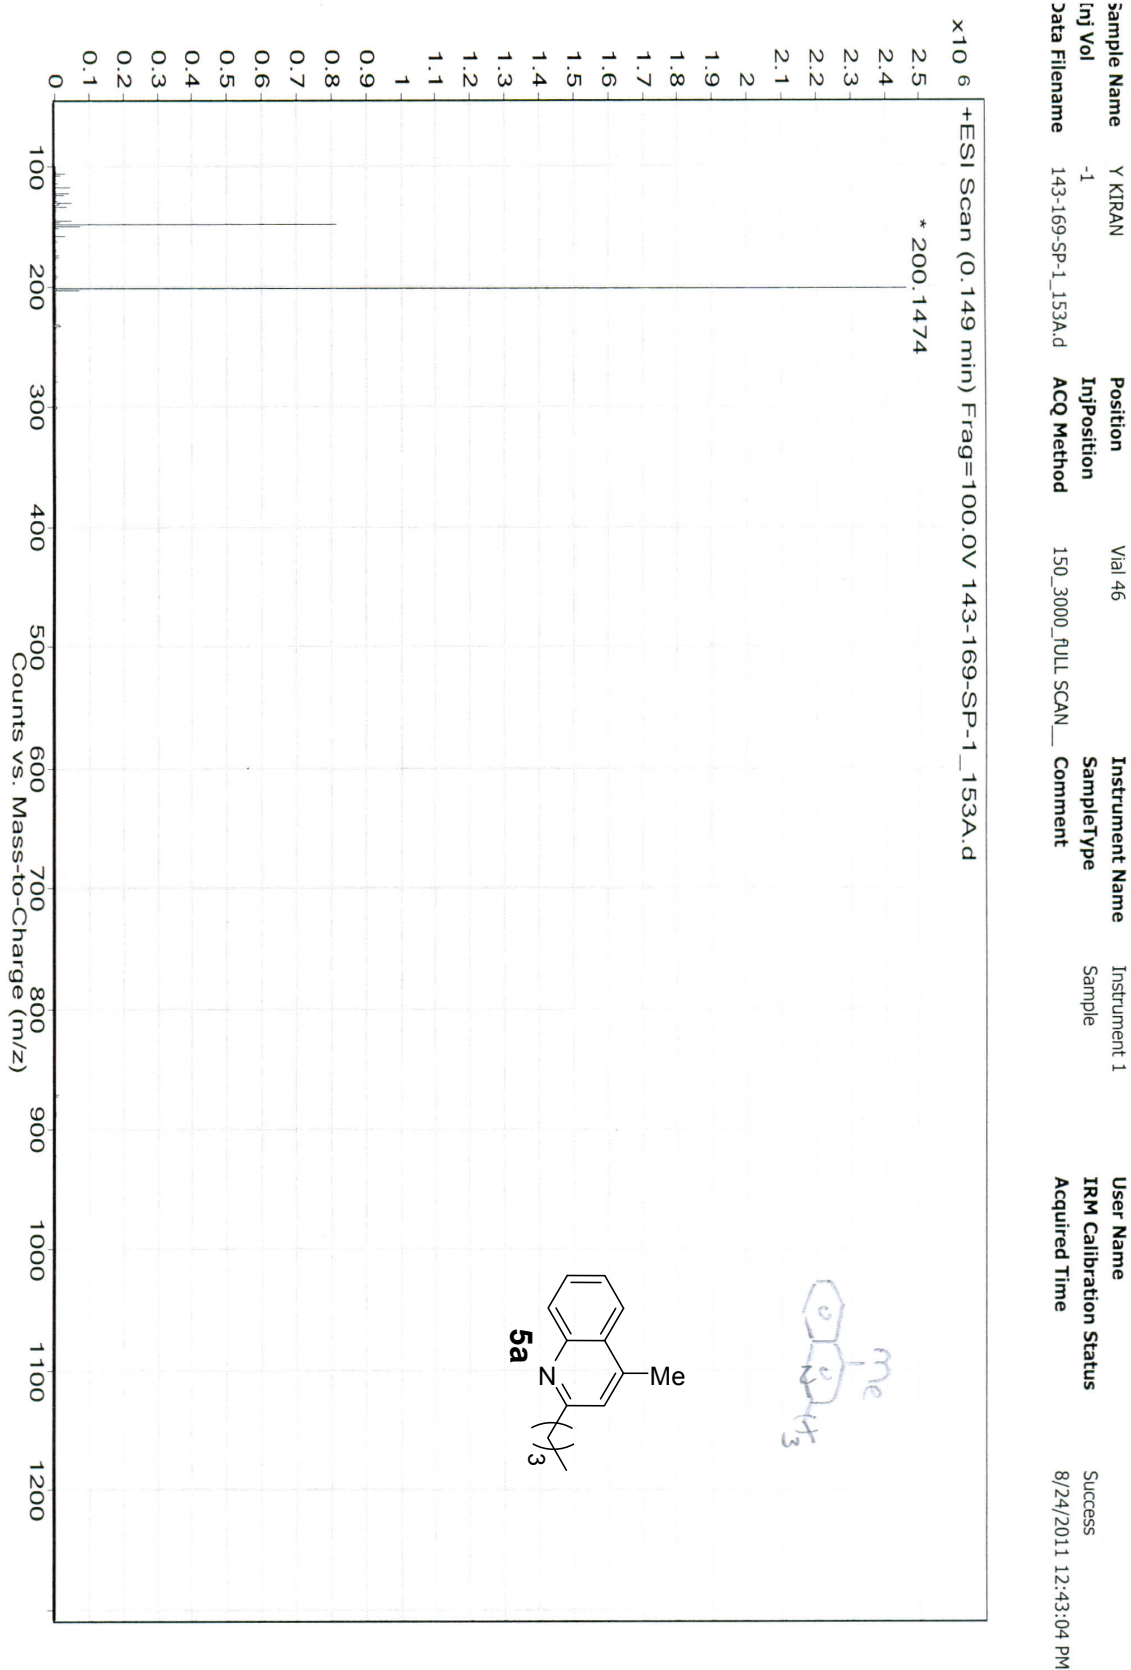

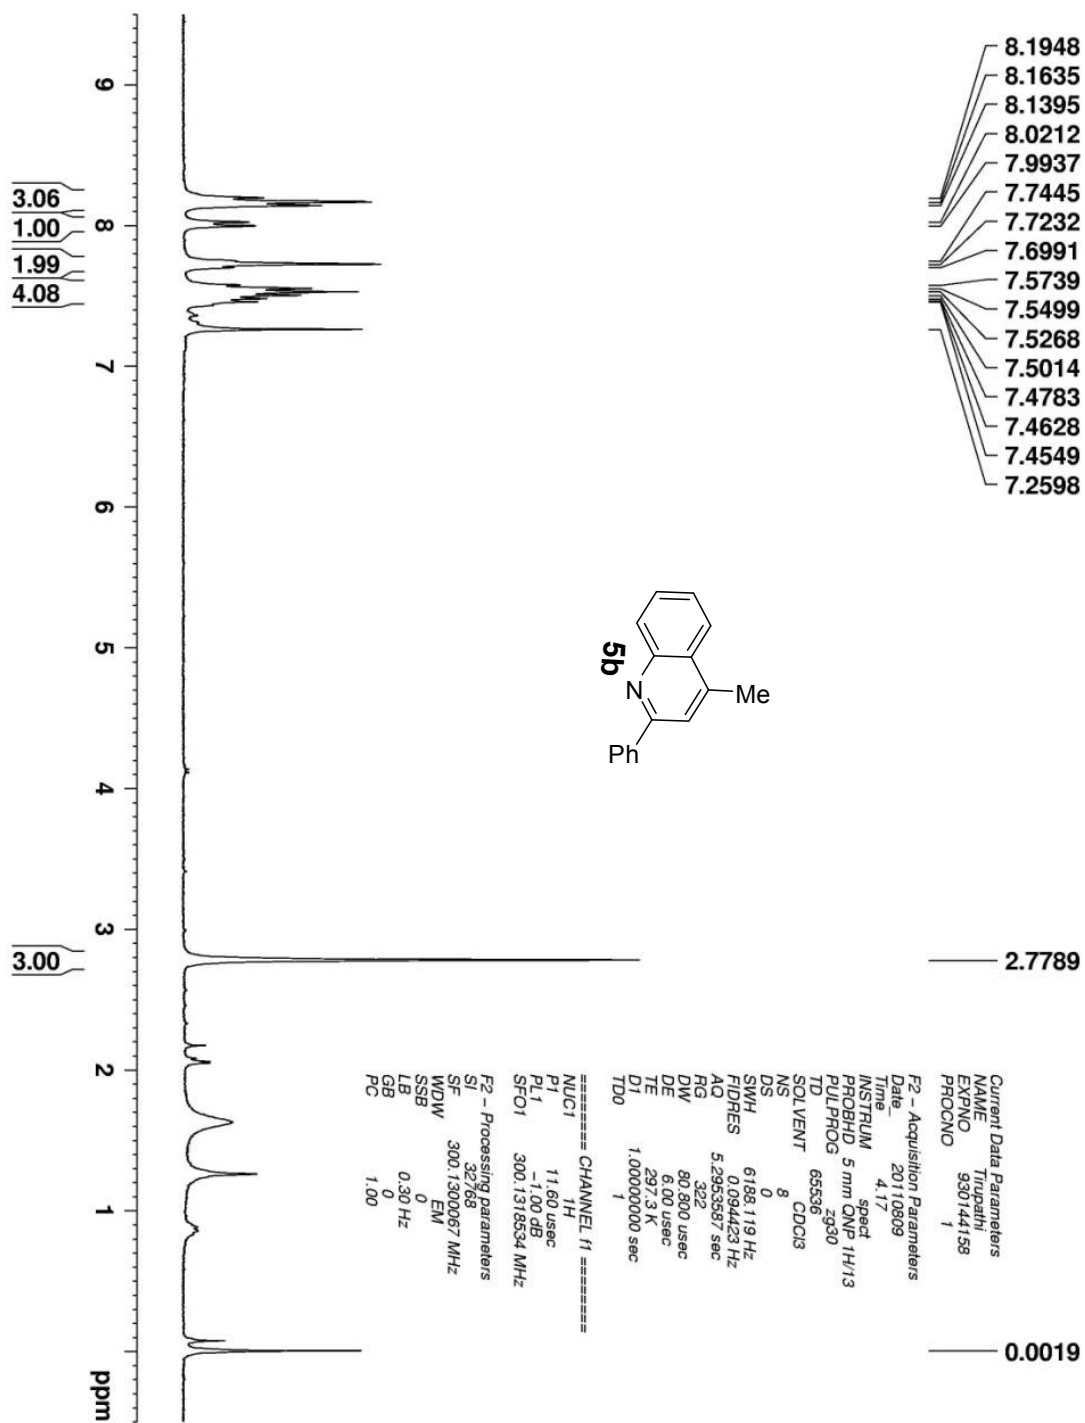

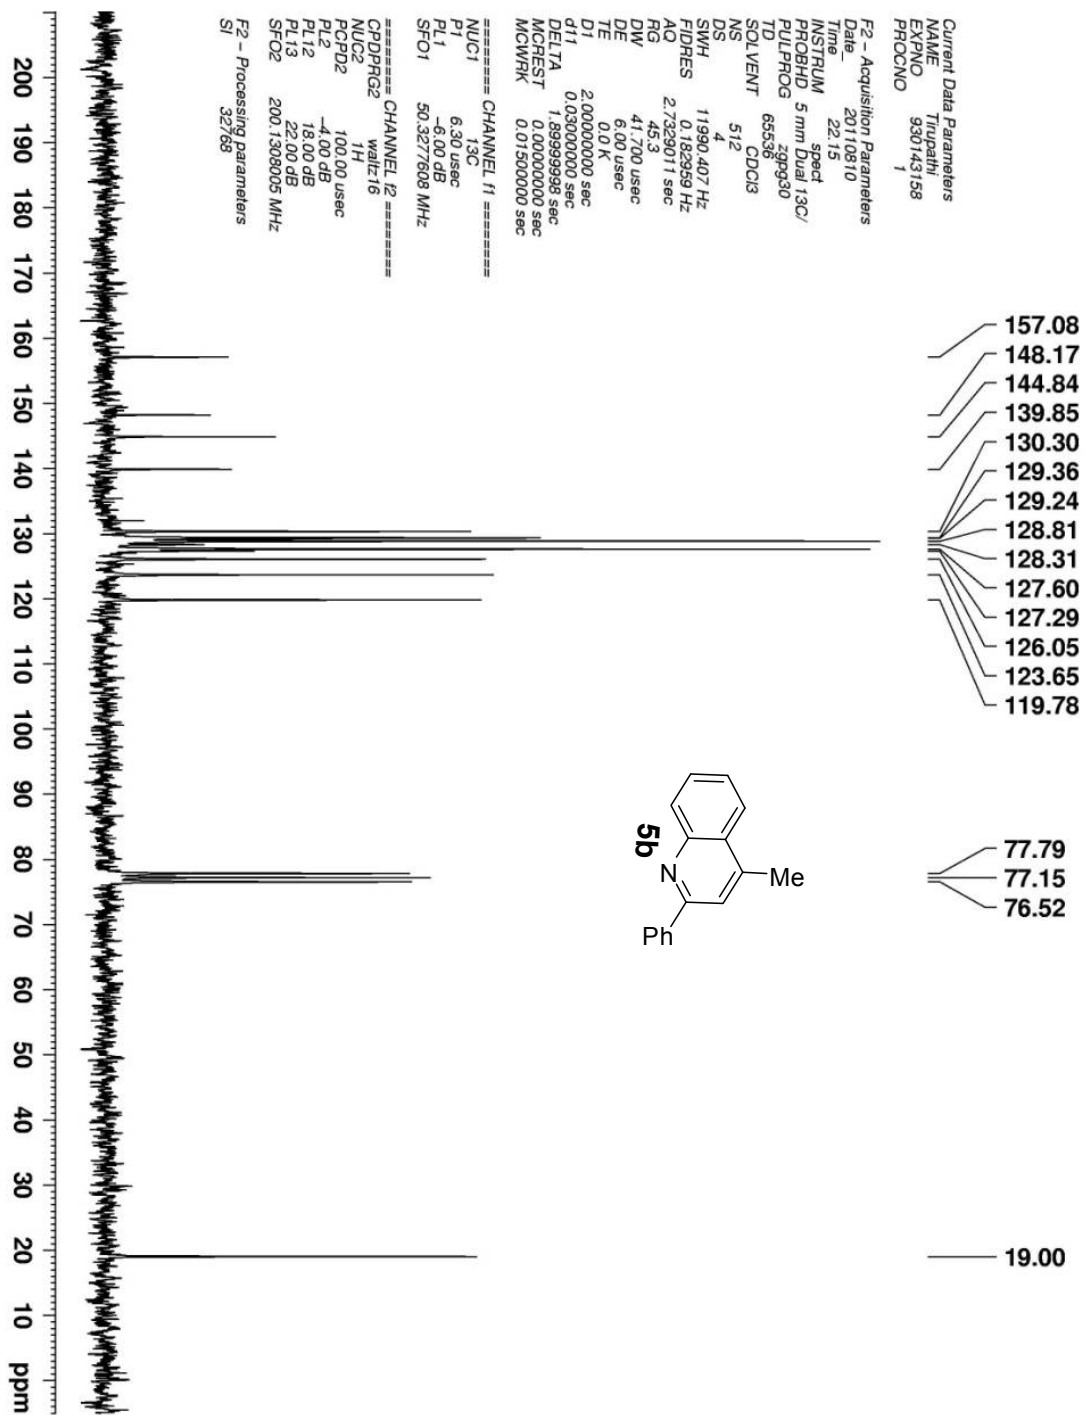

|               |                     |             |                    |                 |              |                        |                        |                      |
|---------------|---------------------|-------------|--------------------|-----------------|--------------|------------------------|------------------------|----------------------|
| Sample Name   | N THIRUPATHI        | Position    | Vial 43            | Instrument Name | Instrument 1 | User Name              | IRM Calibration Status | Success              |
| Inj Vol       | -1                  | InjPosition |                    | SampleType      | Sample       | IRM Calibration Status | Acquired Time          | 8/23/2011 2:54:53 PM |
| Data Filename | 143-158-SP-1_137A.d | ACQ Method  | 150_3000_FULL SCAN | Comment         |              | Acquired Time          |                        |                      |

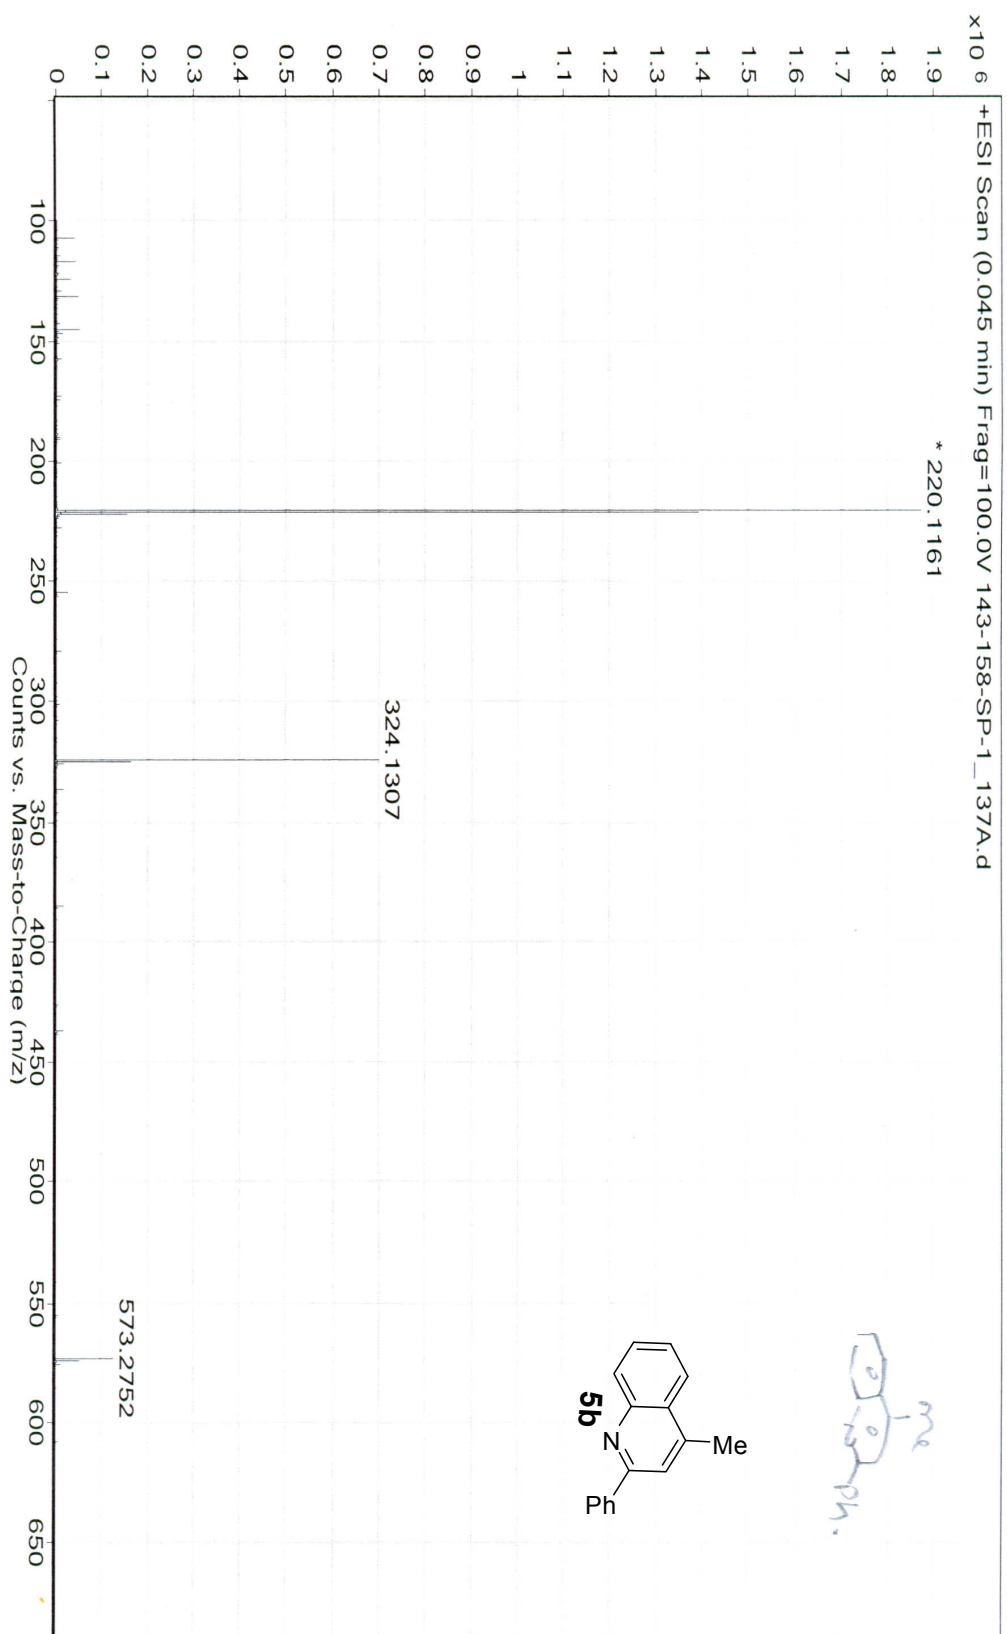

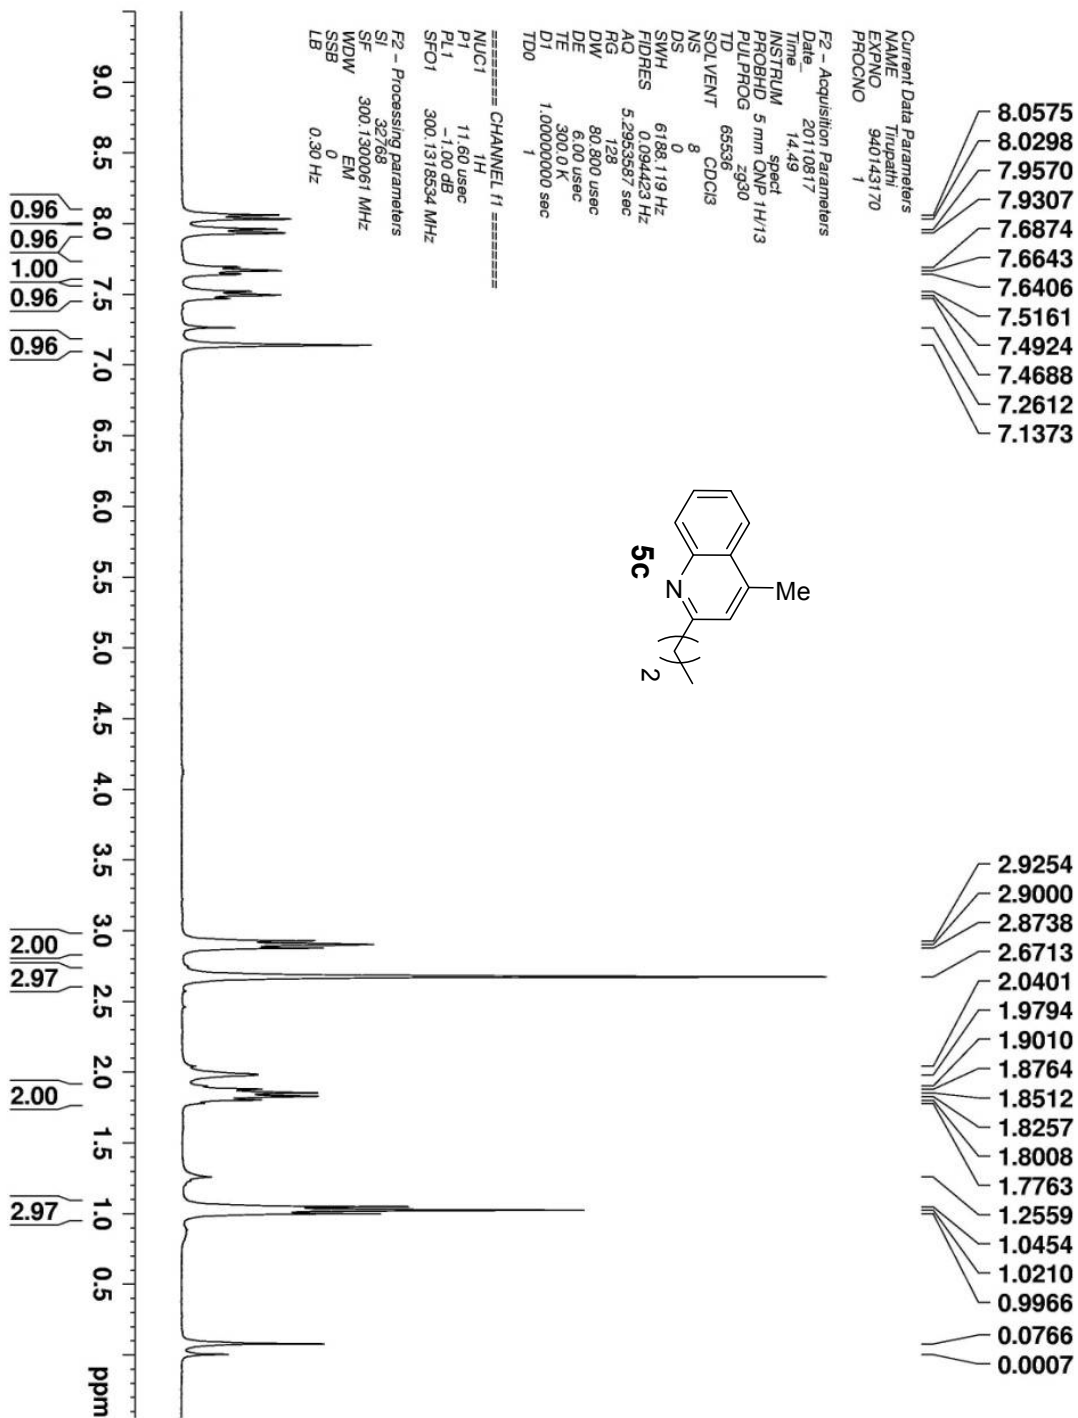

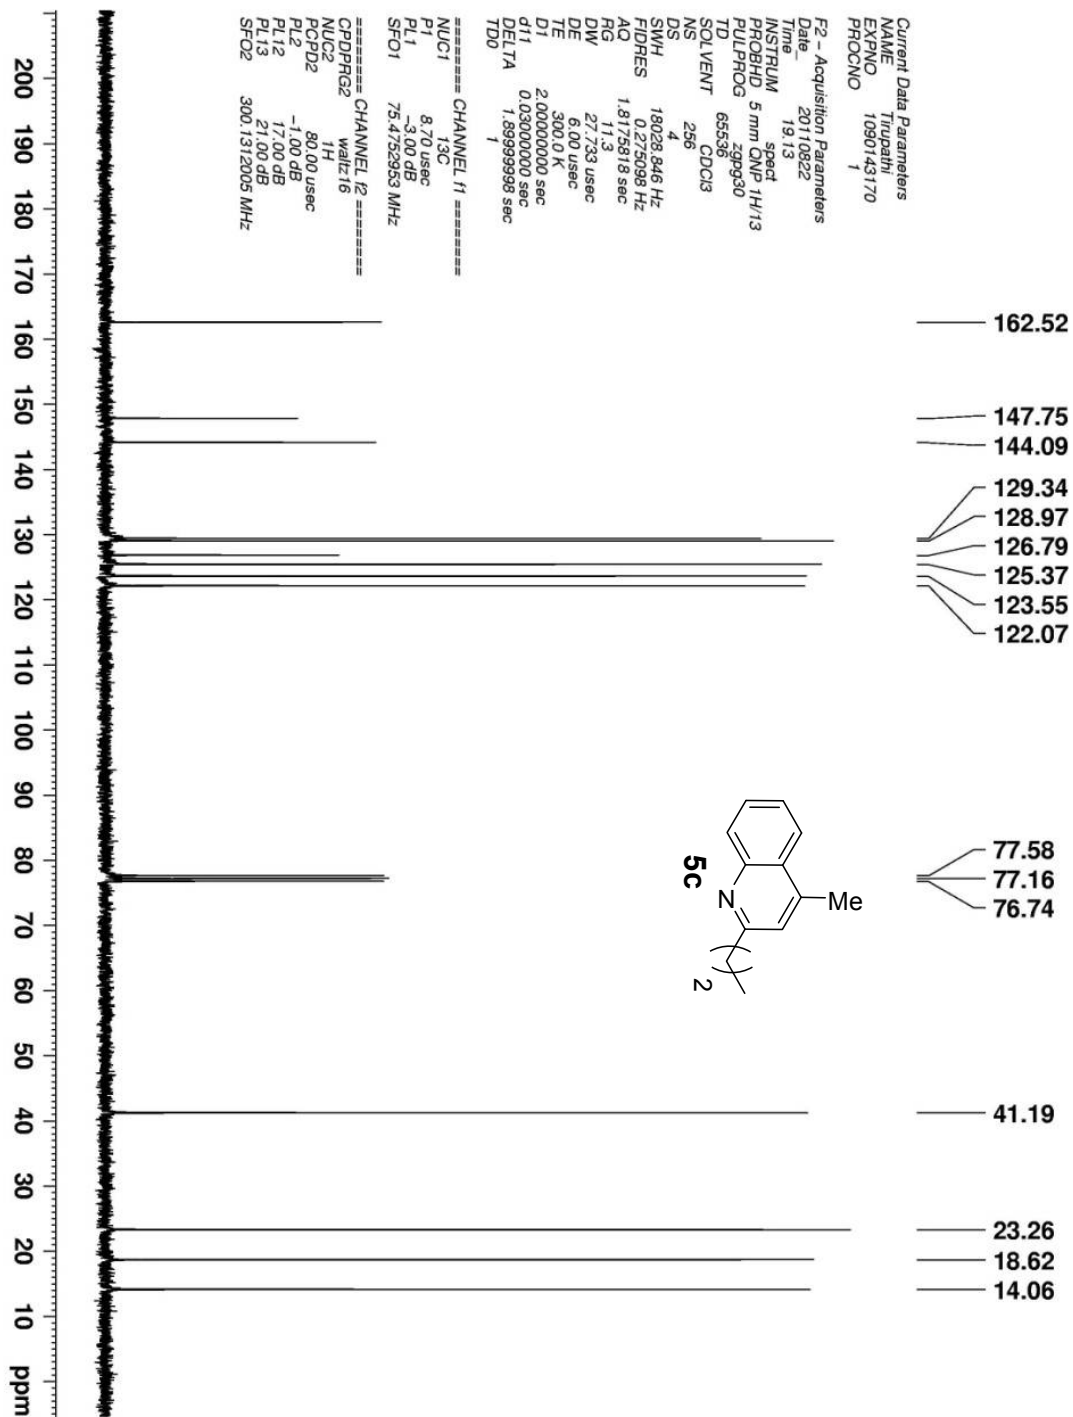

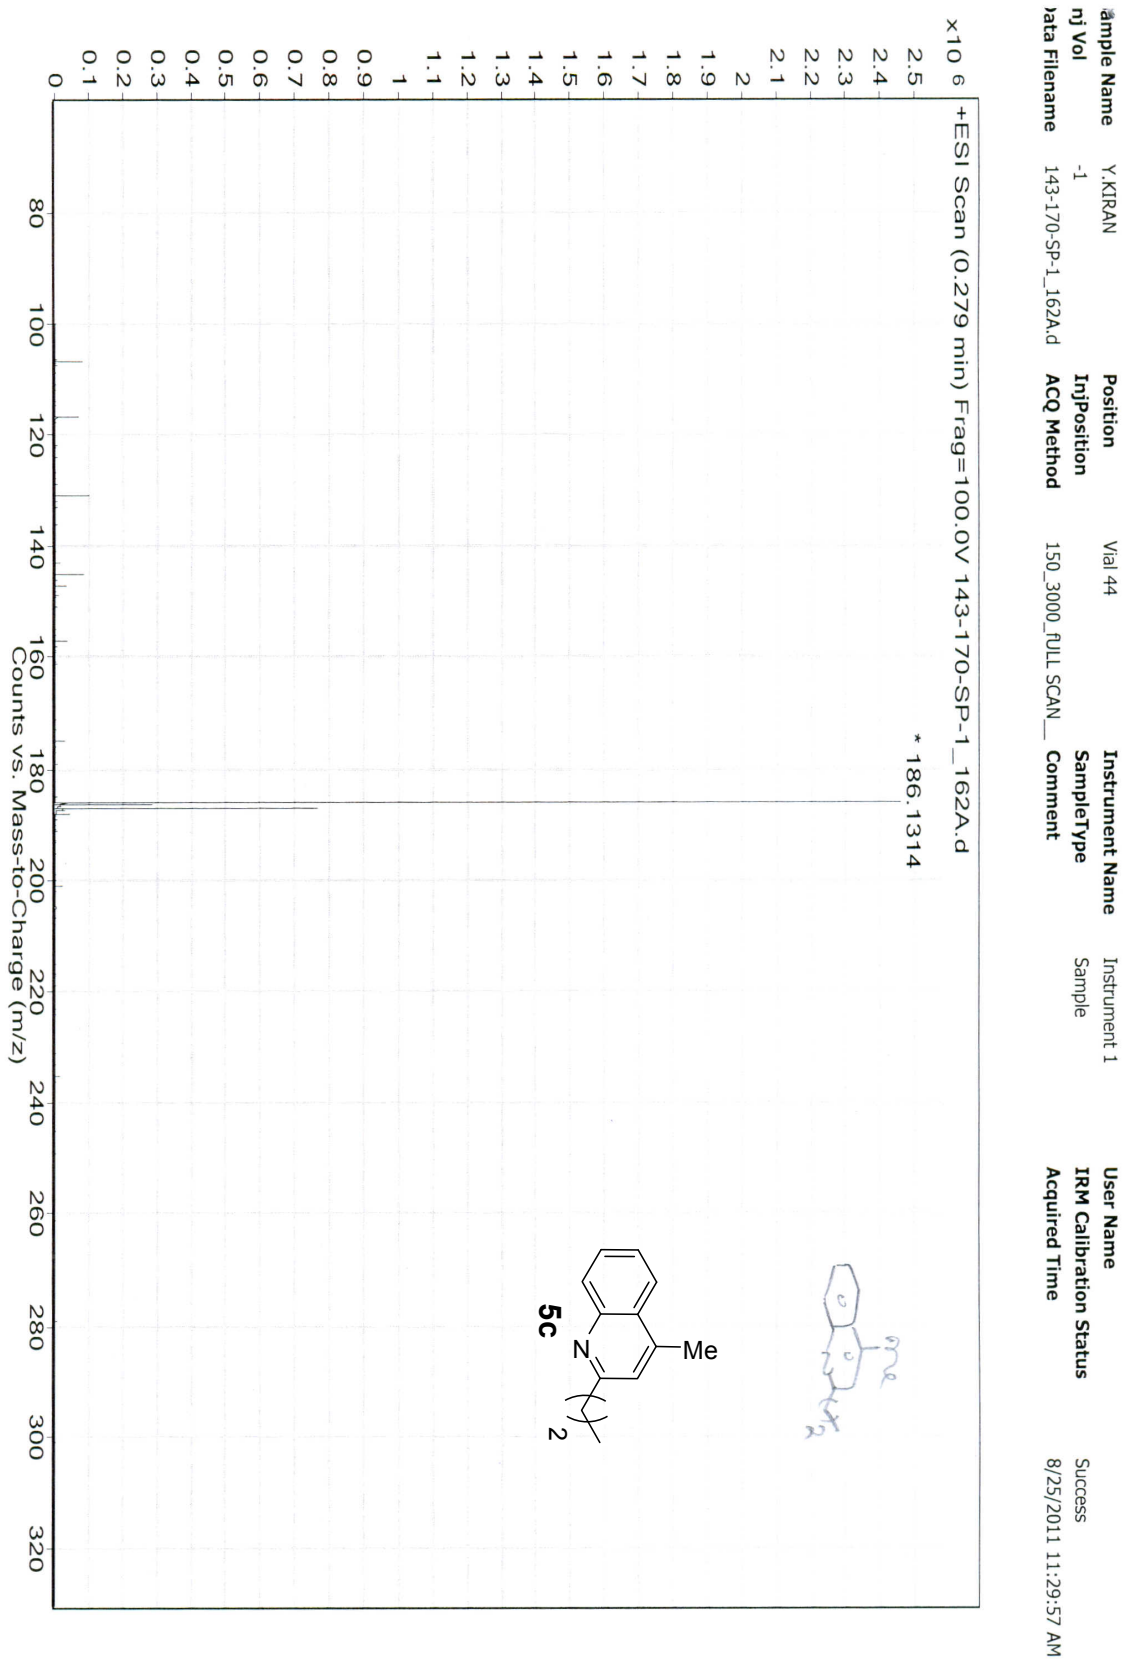

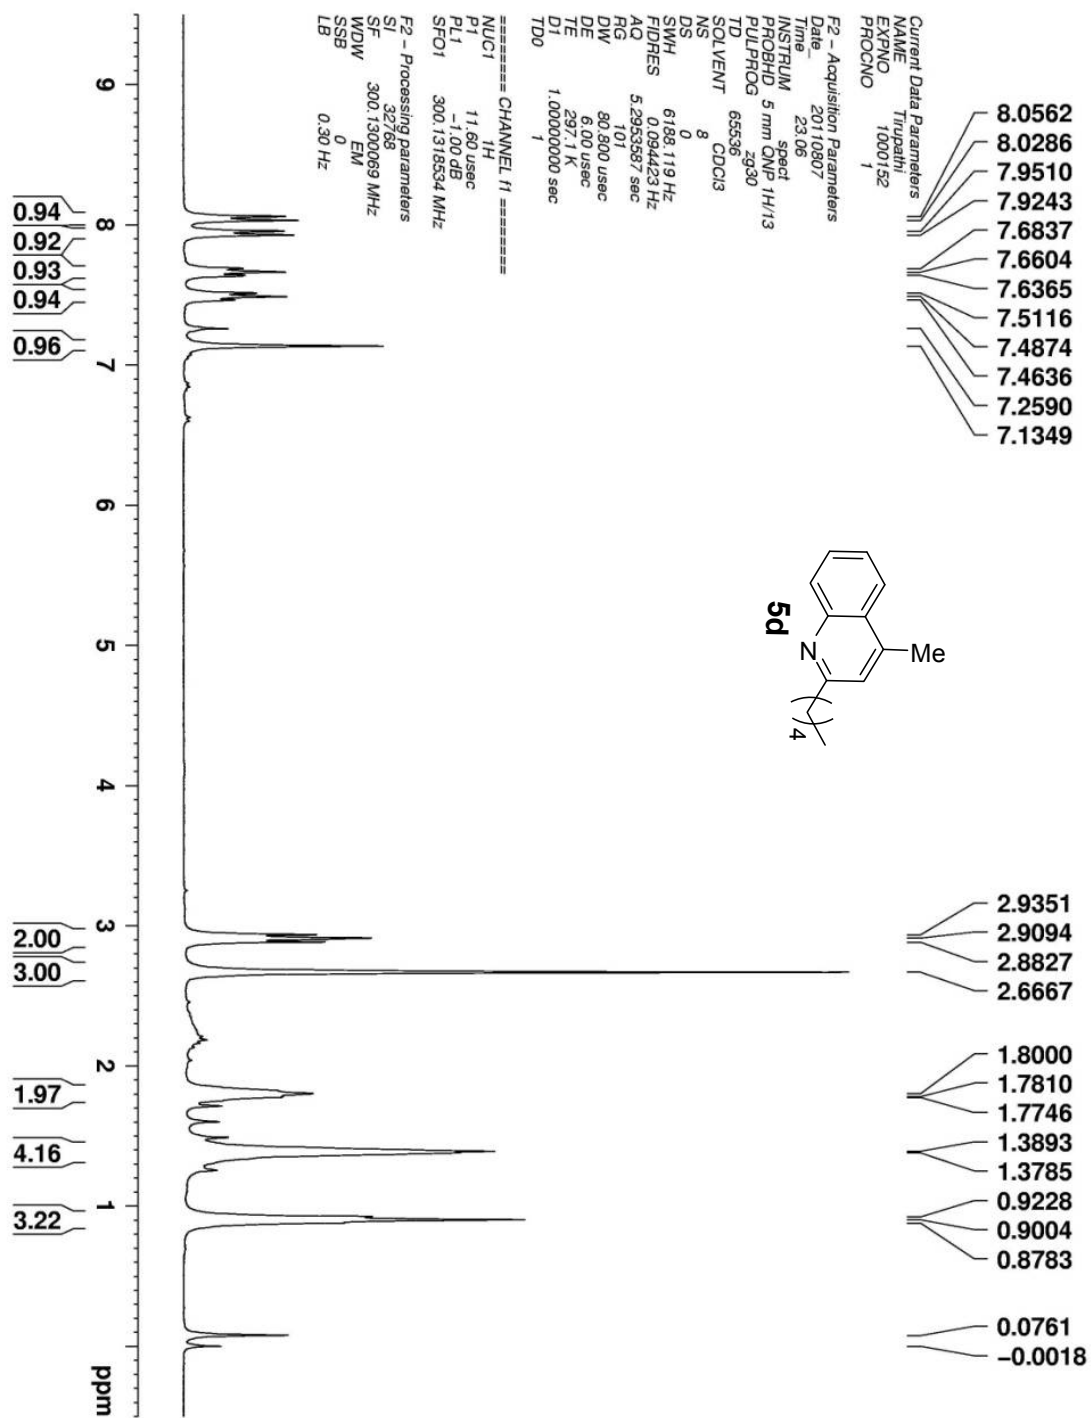



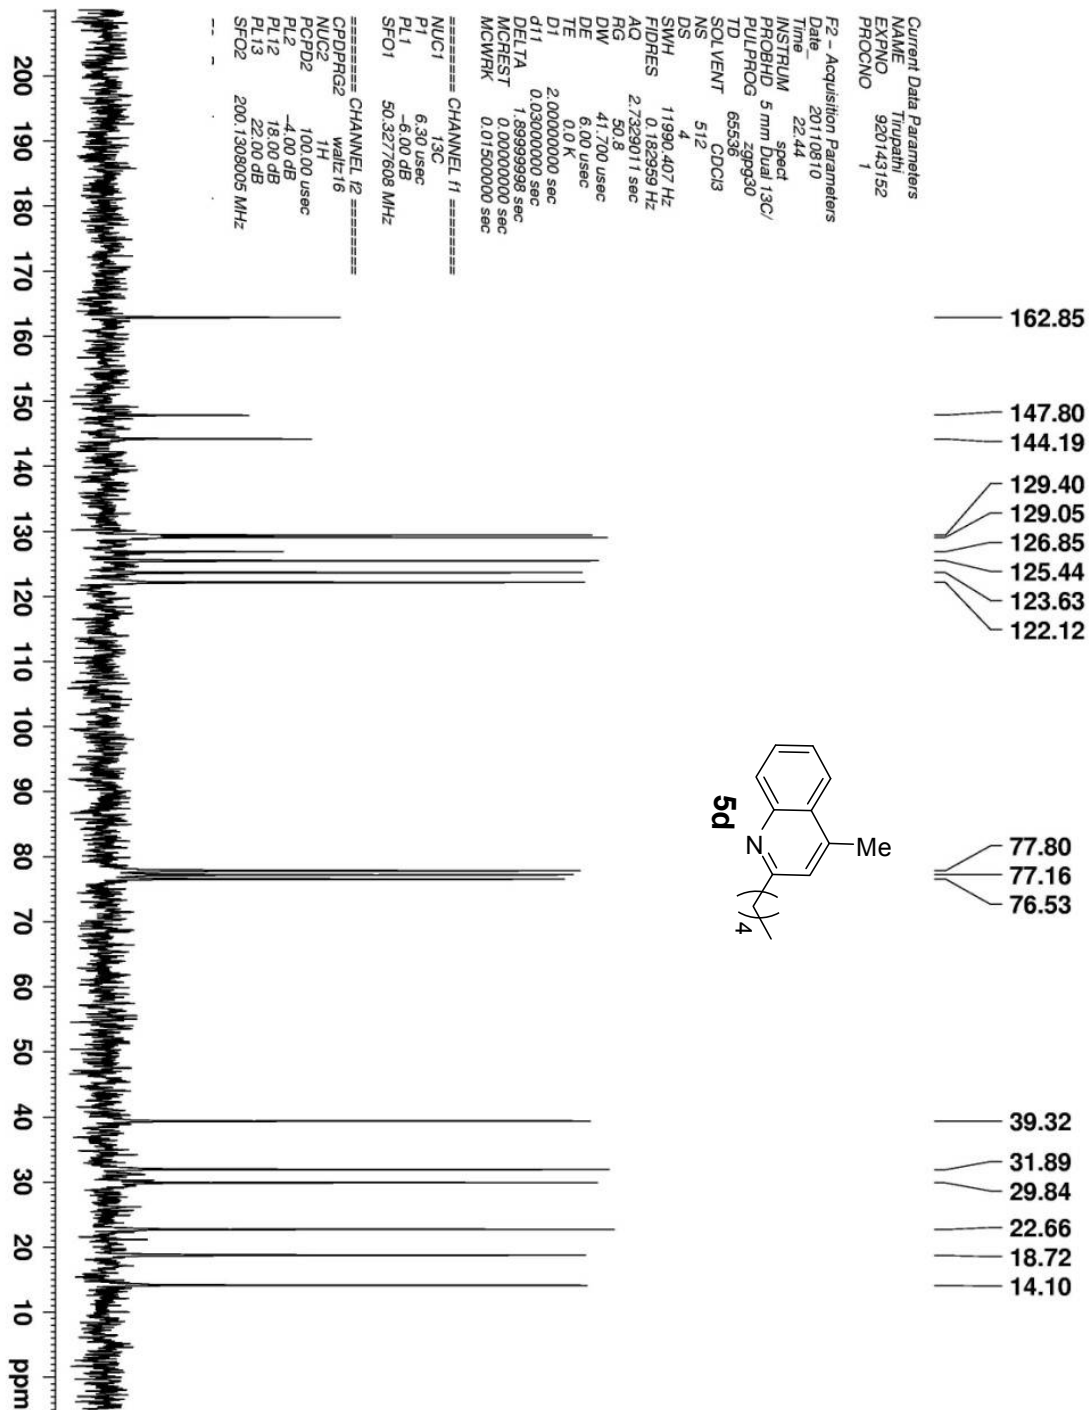

|               |                     |             |                    |                 |              |                        |                      |
|---------------|---------------------|-------------|--------------------|-----------------|--------------|------------------------|----------------------|
| Sample Name   | N THIRUVAPATHI      | Position    | Vial 48            | Instrument Name | Instrument 1 | User Name              |                      |
| Inj Vol       | -1                  | InjPosition |                    | SampleType      | Sample       | IRM Calibration Status | Success              |
| Data Filename | 143-152-SP-1_124A.d | Acq Method  | 150_3000_FULL SCAN | Comment         |              | Acquired Time          | 8/18/2011 2:11:55 PM |

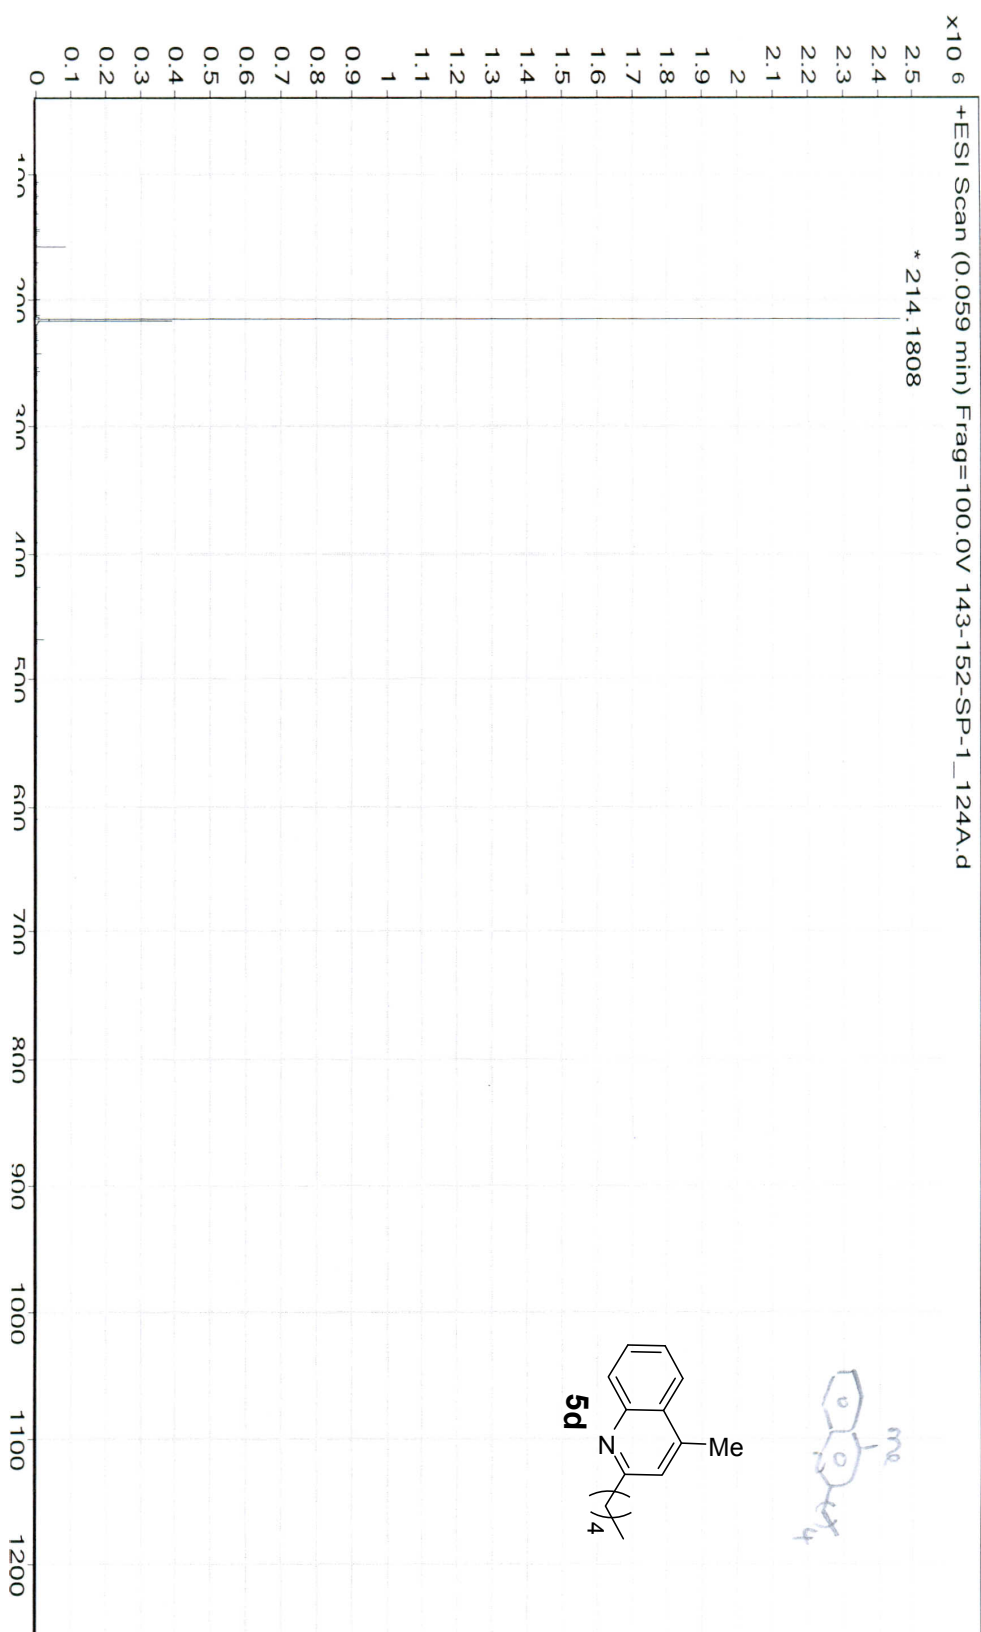

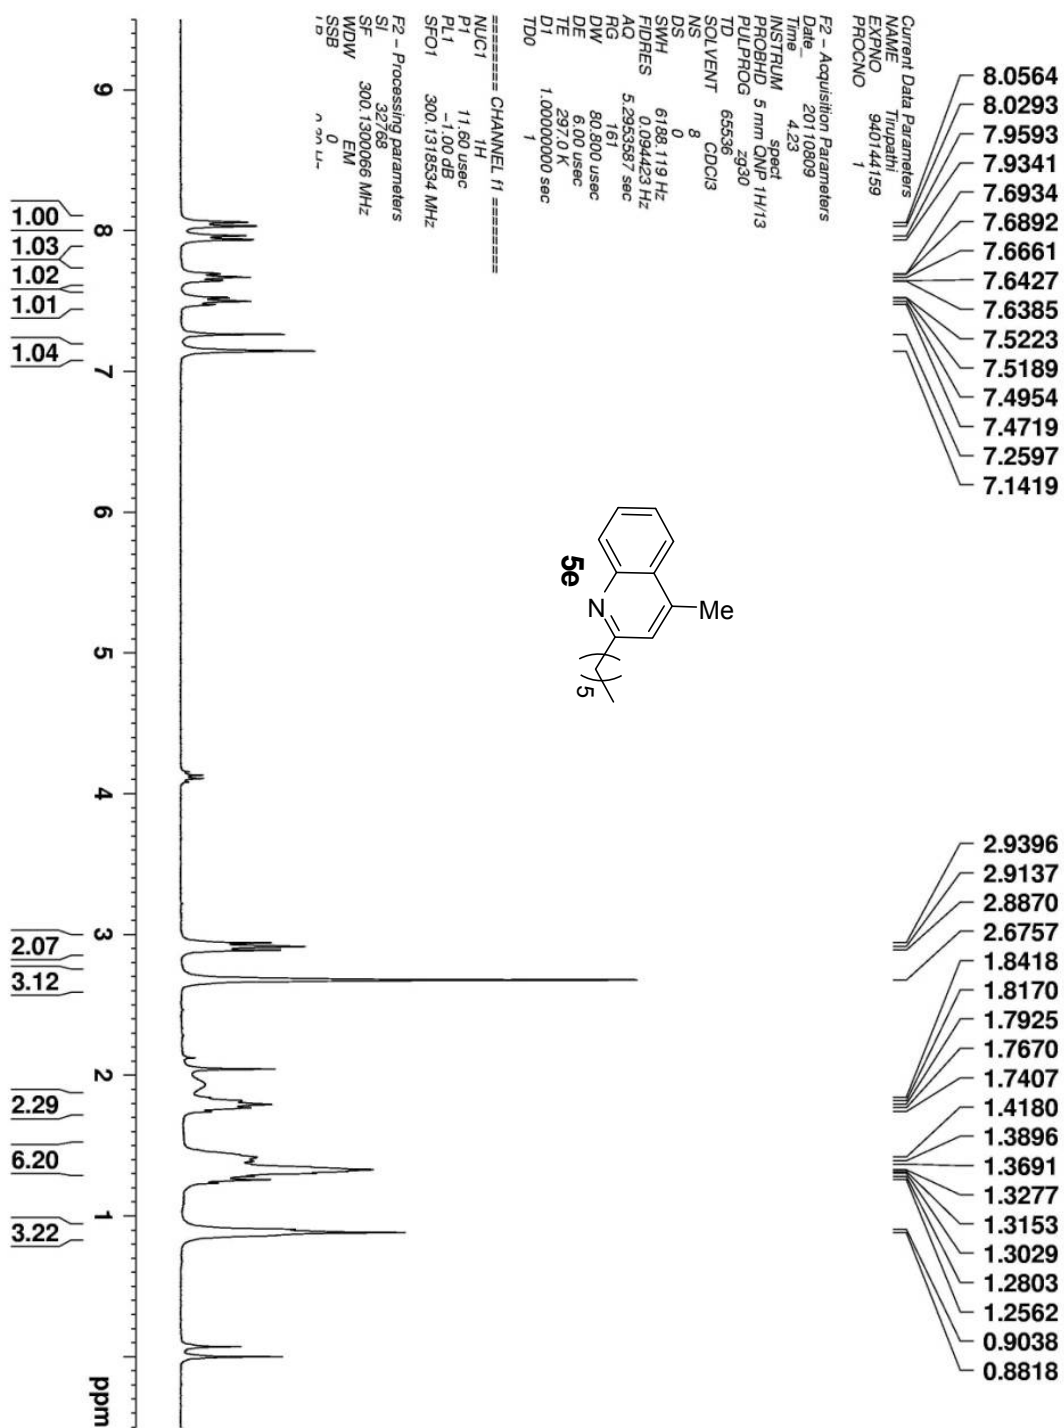

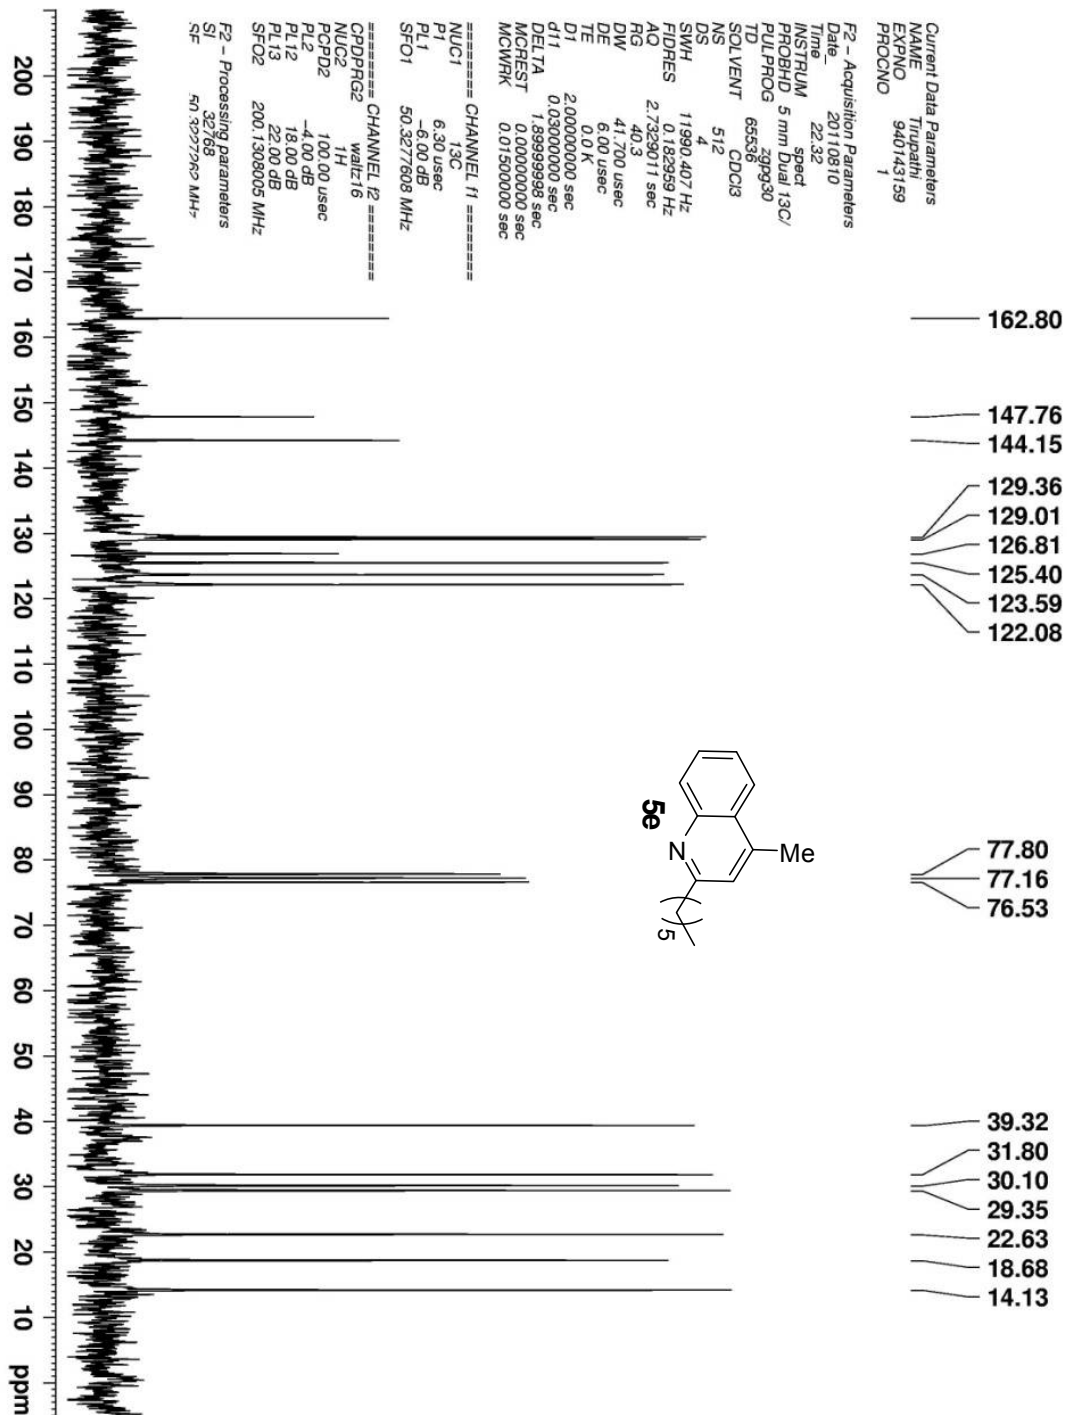

|               |                     |             |                    |                 |              |                        |                      |
|---------------|---------------------|-------------|--------------------|-----------------|--------------|------------------------|----------------------|
| Sample Name   | Y KIRAN KUMAR       | Position    | Vial 41            | Instrument Name | Instrument 1 | User Name              |                      |
| Inj Vol       | -1                  | InjPosition |                    | SampleType      | Sample       | IRM Calibration Status | Success              |
| Data Filename | 143-159-SP-1_135A.d | ACQ Method  | 150_3000_FULL SCAN | Comment         |              | Acquired Time          | 8/23/2011 2:42:57 PM |

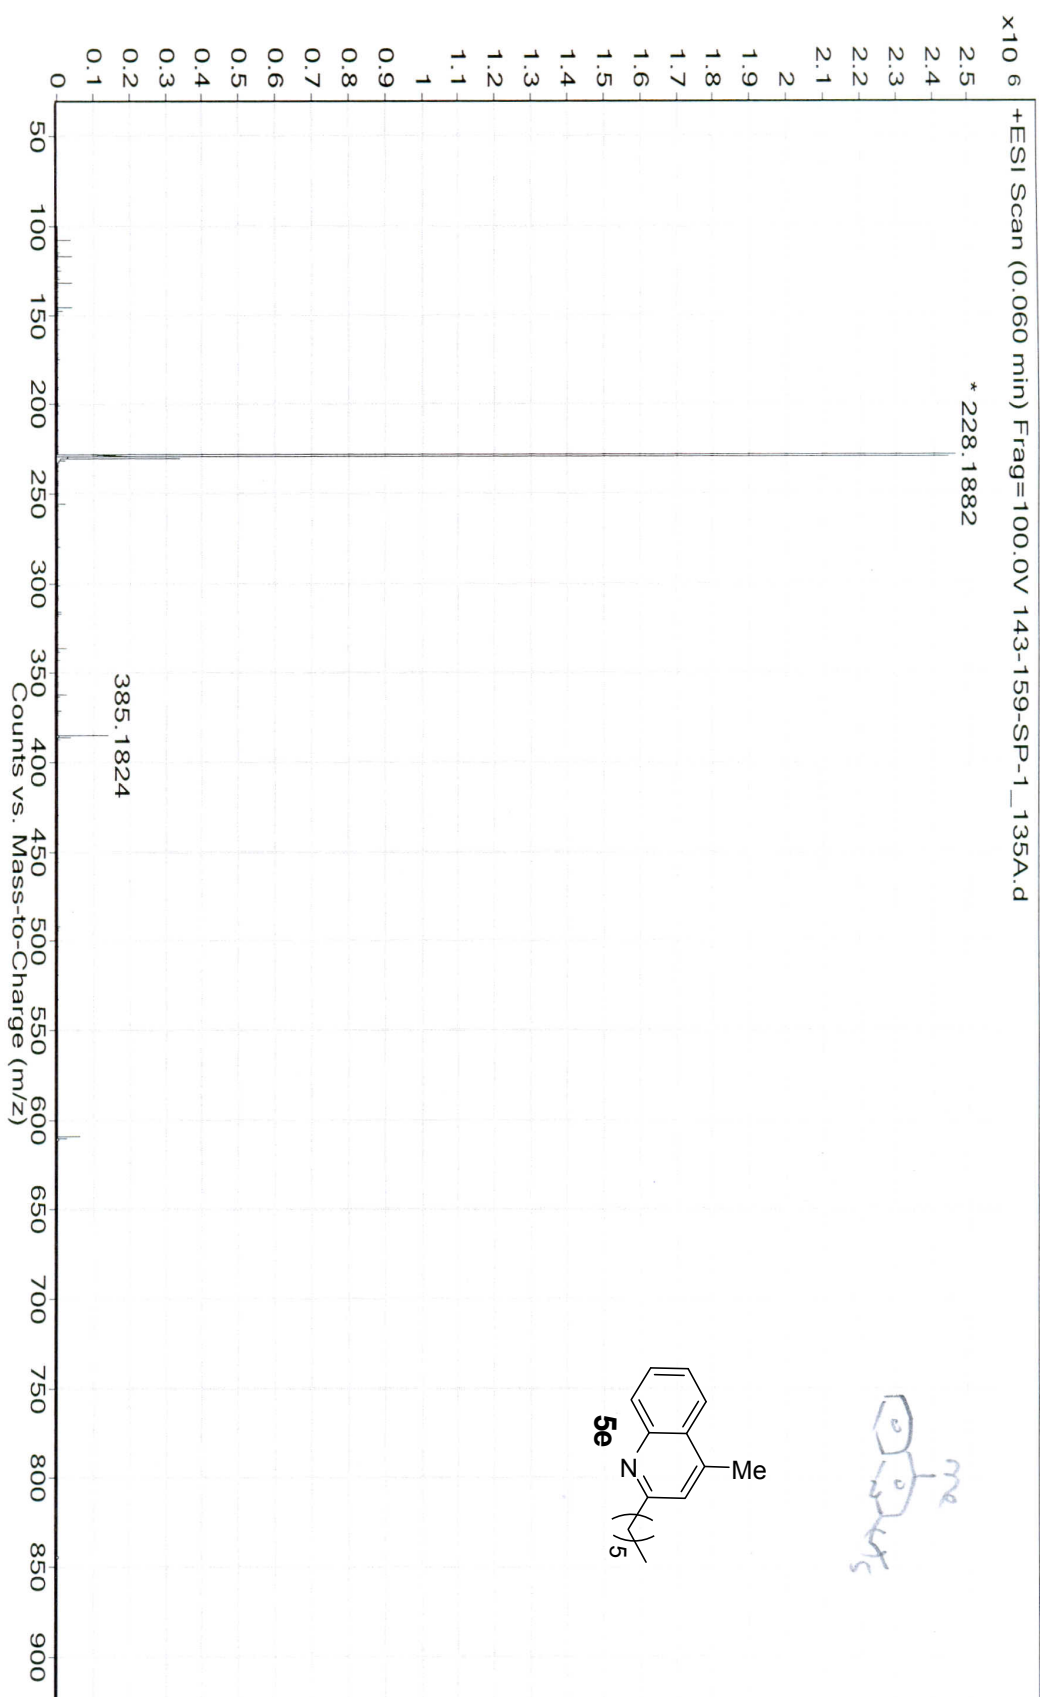

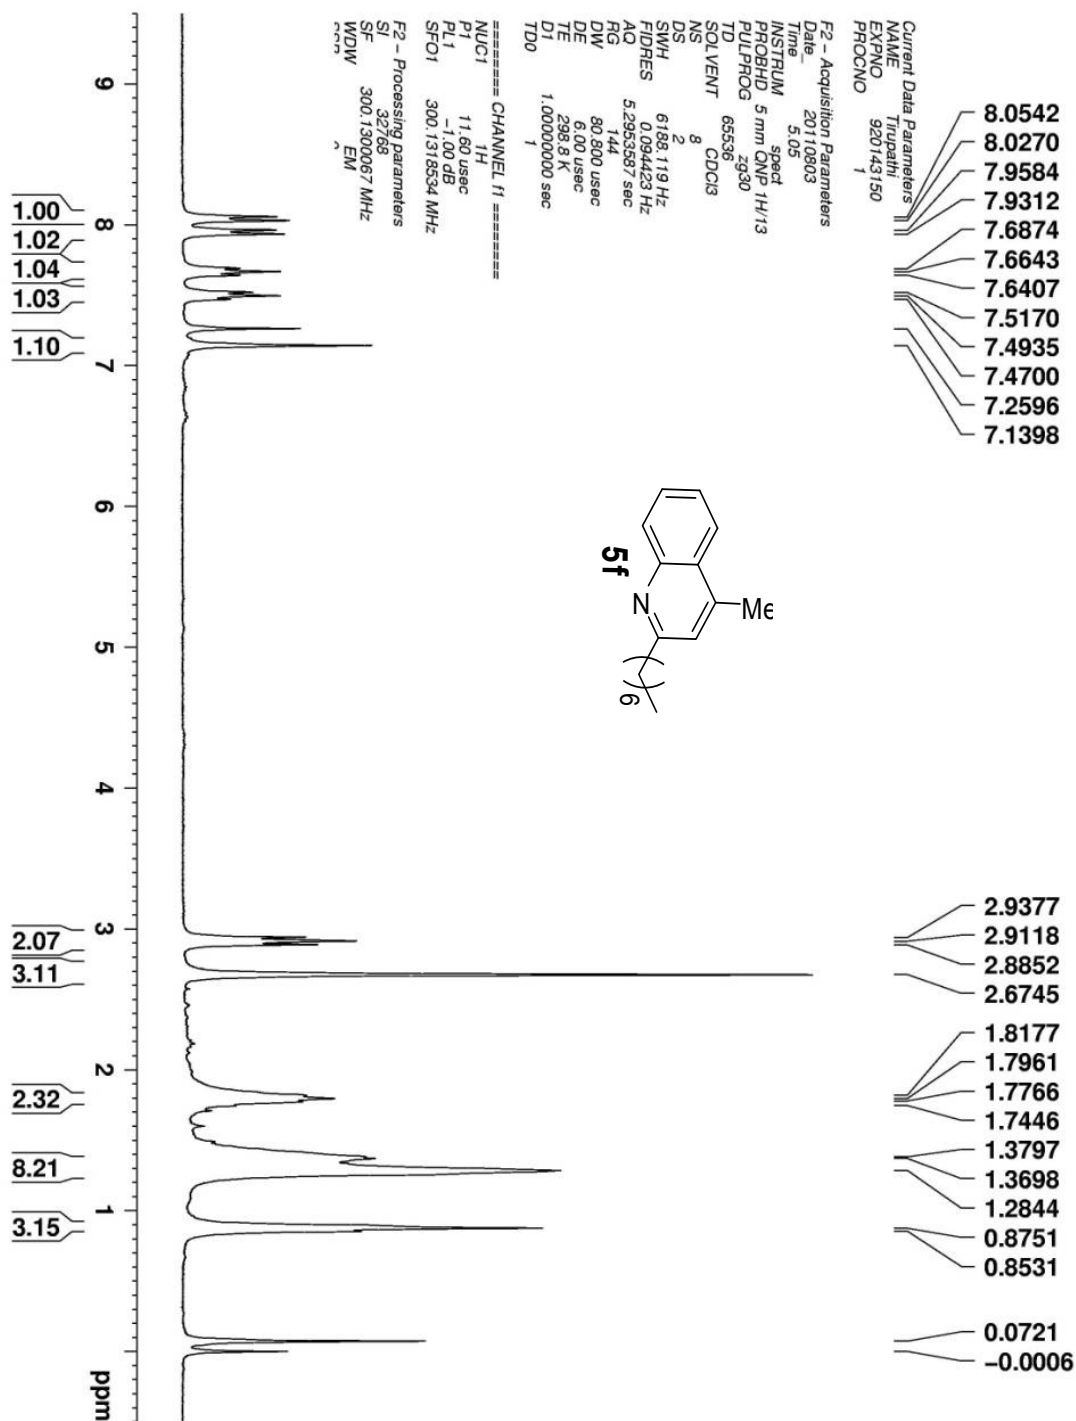

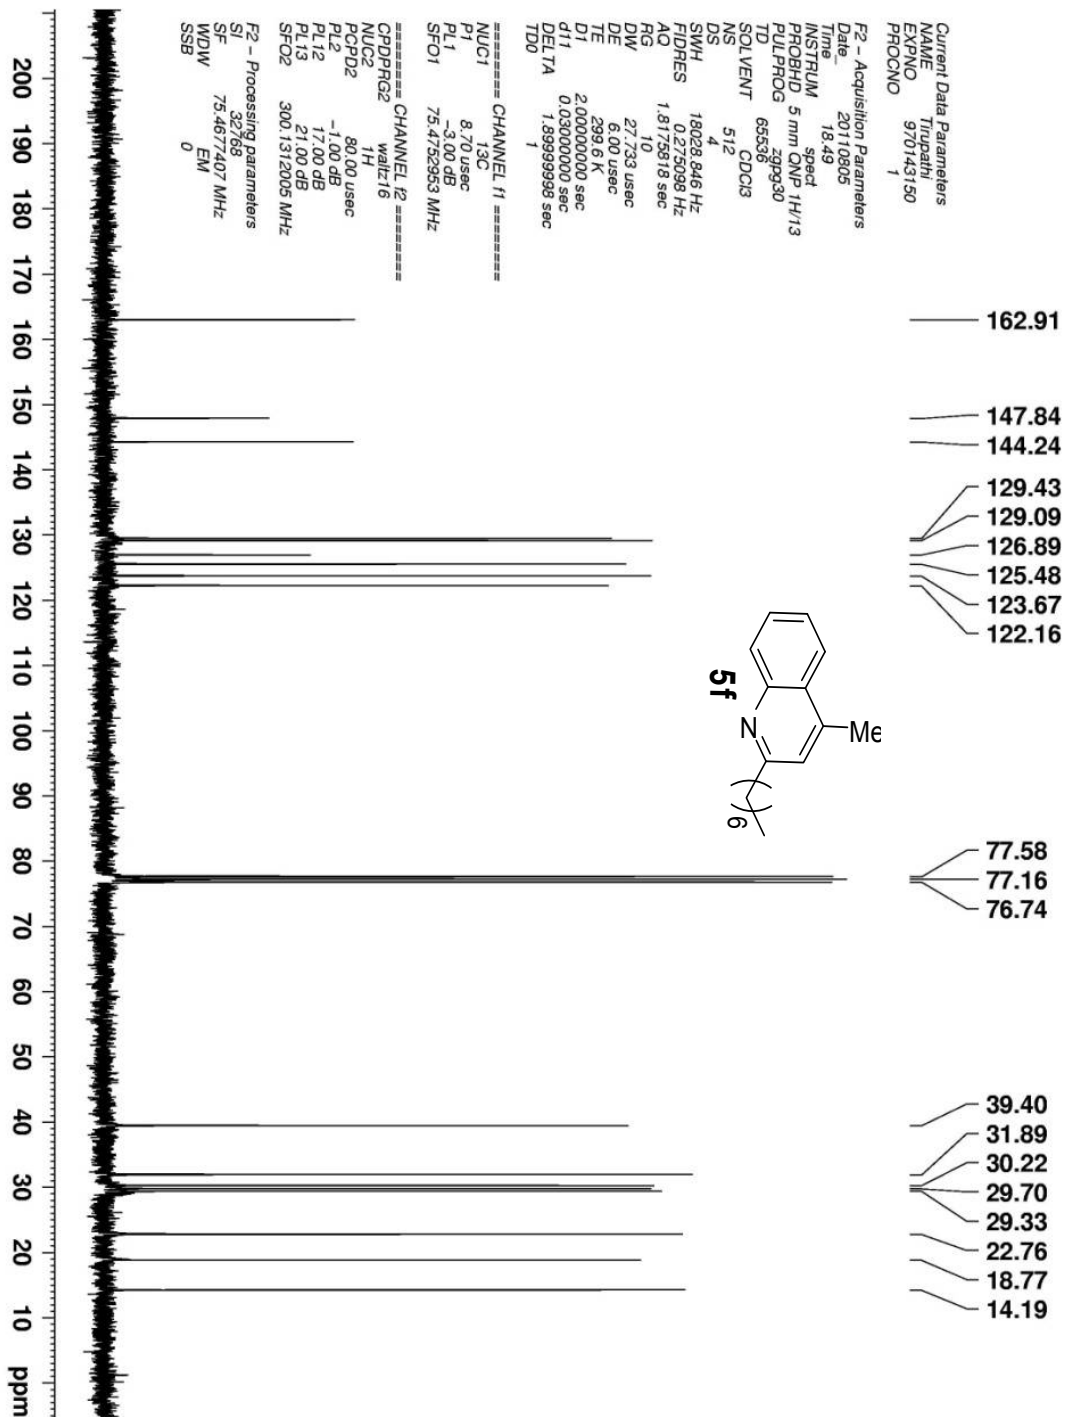

|               |                     |             |                    |                 |              |                    |                       |
|---------------|---------------------|-------------|--------------------|-----------------|--------------|--------------------|-----------------------|
| Sample Name   | N THIRUVAPATHI      | Position    | Vial 48            | Instrument Name | Instrument 1 | User Name          | IRM                   |
| Inj Vol       | -1                  | InjPosition |                    | SampleType      | Sample       | Calibration Status |                       |
| Data Filename | 143-150-SP-1_134A.d | ACQ Method  | 150_3000_FULL_SCAN | Comment         |              | Acquired Time      | Success               |
|               |                     |             |                    |                 |              |                    | 8/19/2011 12:45:17 PM |

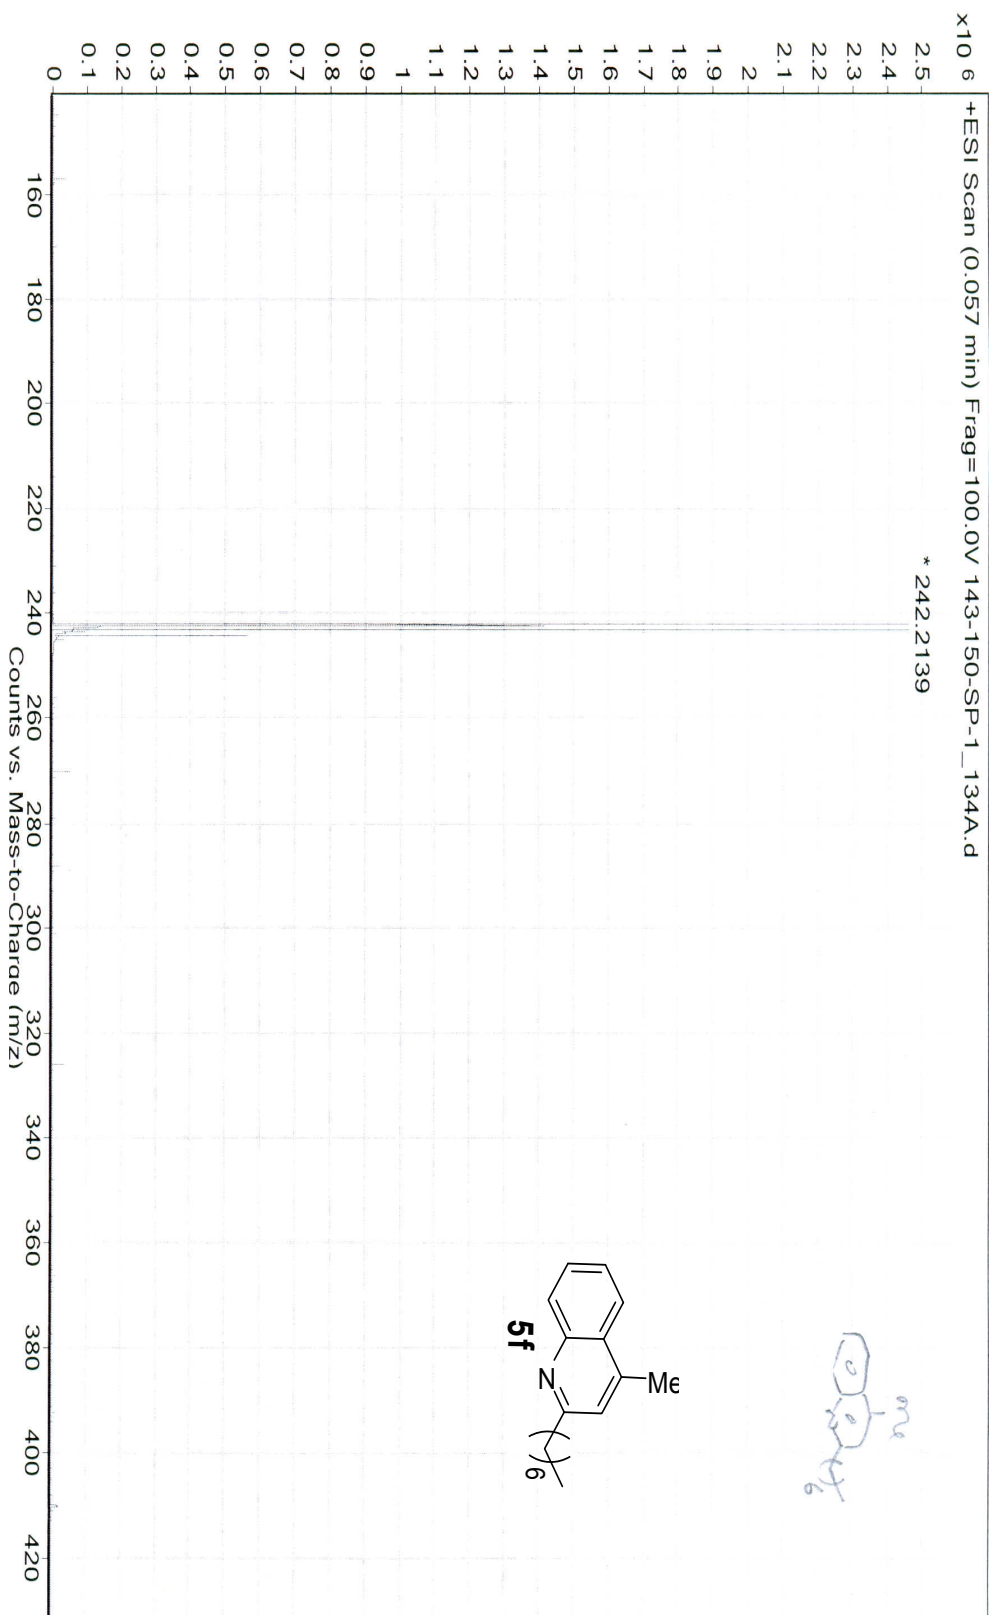



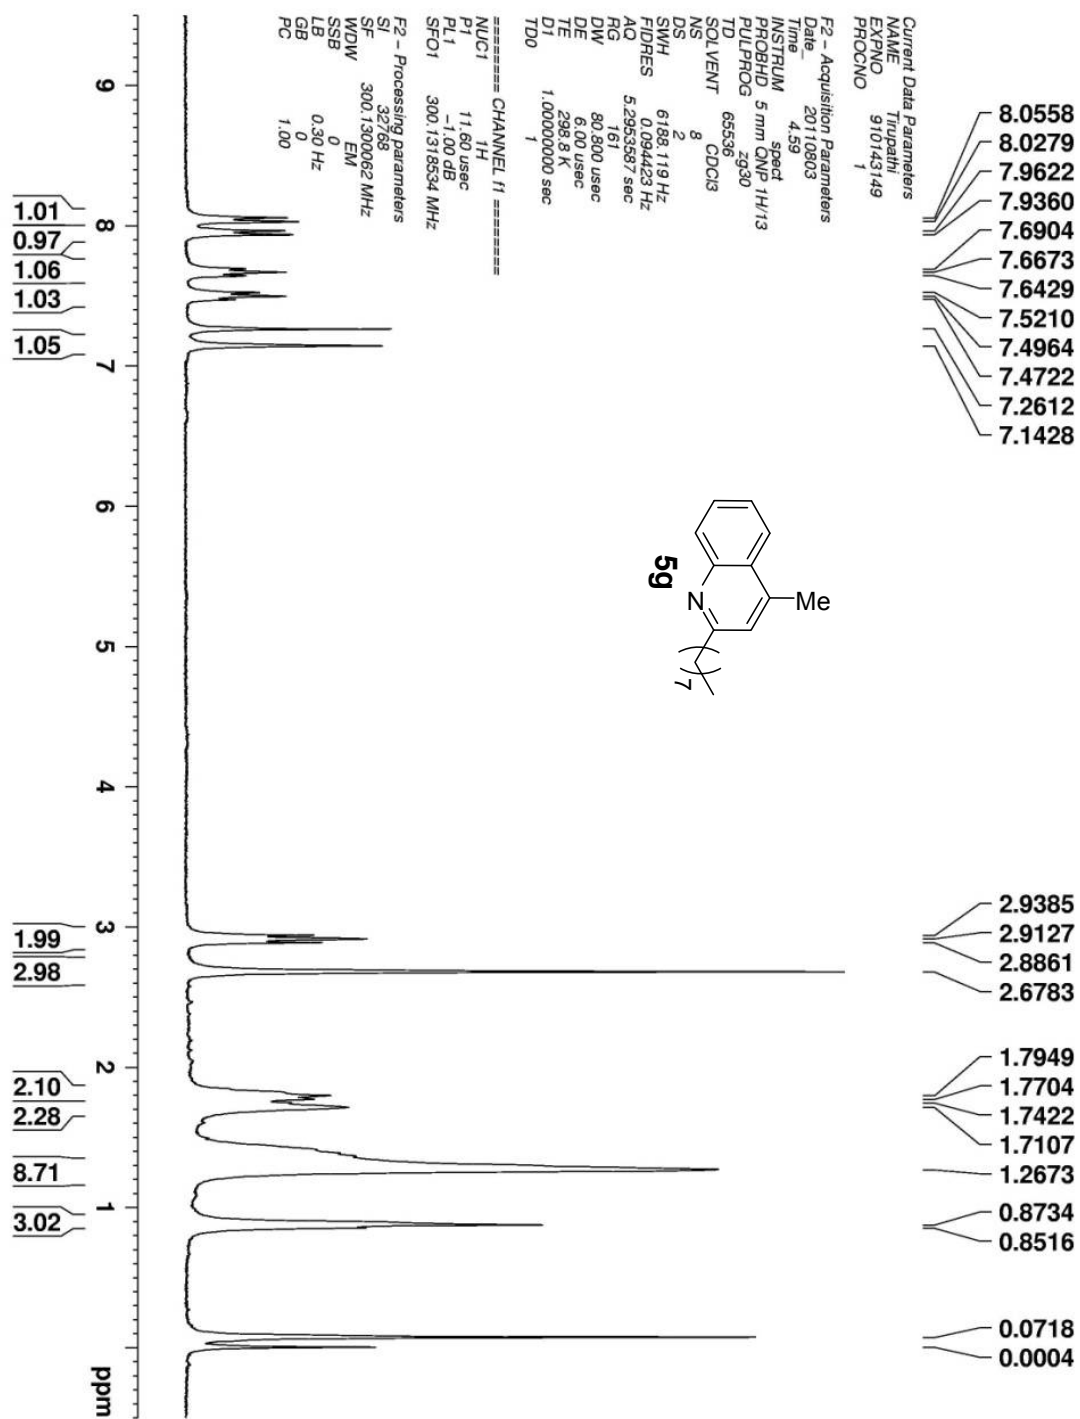

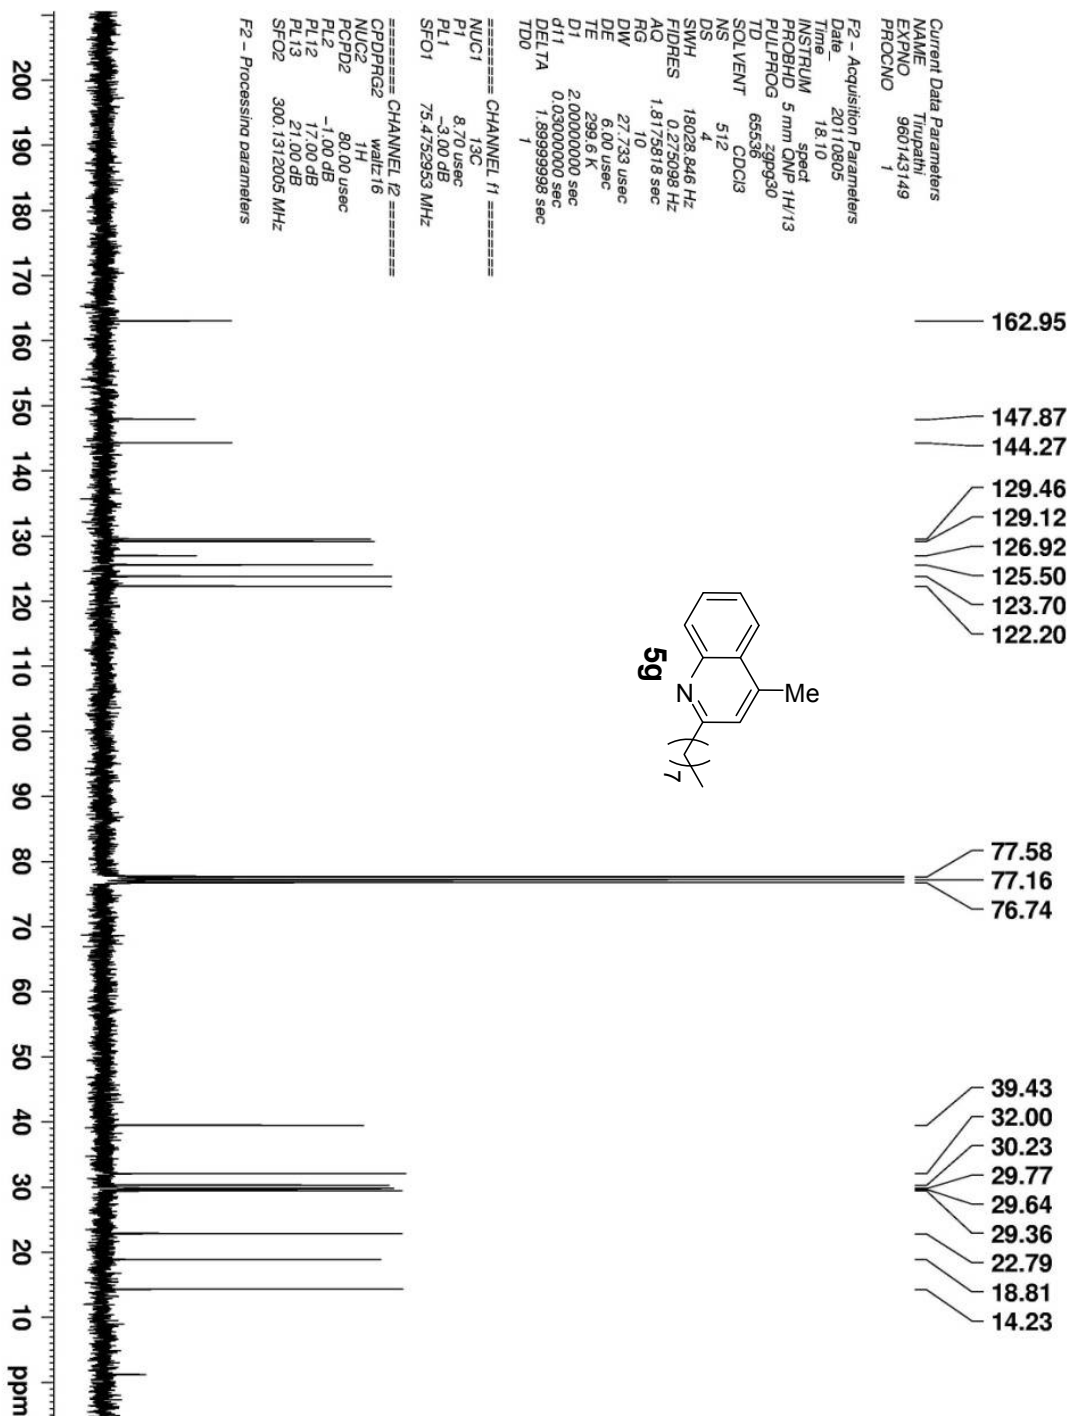

|               |                     |             |                    |                 |              |                        |                       |
|---------------|---------------------|-------------|--------------------|-----------------|--------------|------------------------|-----------------------|
| Sample Name   | N THIRUPATHI        | Position    | Vial 44            | Instrument Name | Instrument 1 | User Name              | Success               |
| Inj Vol       | -1                  | InjPosition |                    | SampleType      | Sample       | IRM Calibration Status |                       |
| Data Filename | 143-149-SP-1_105A.d | ACQ Method  | 150_3000_FULL SCAN | Comment         |              | Acquired Time          | 8/17/2011 12:22:44 PM |

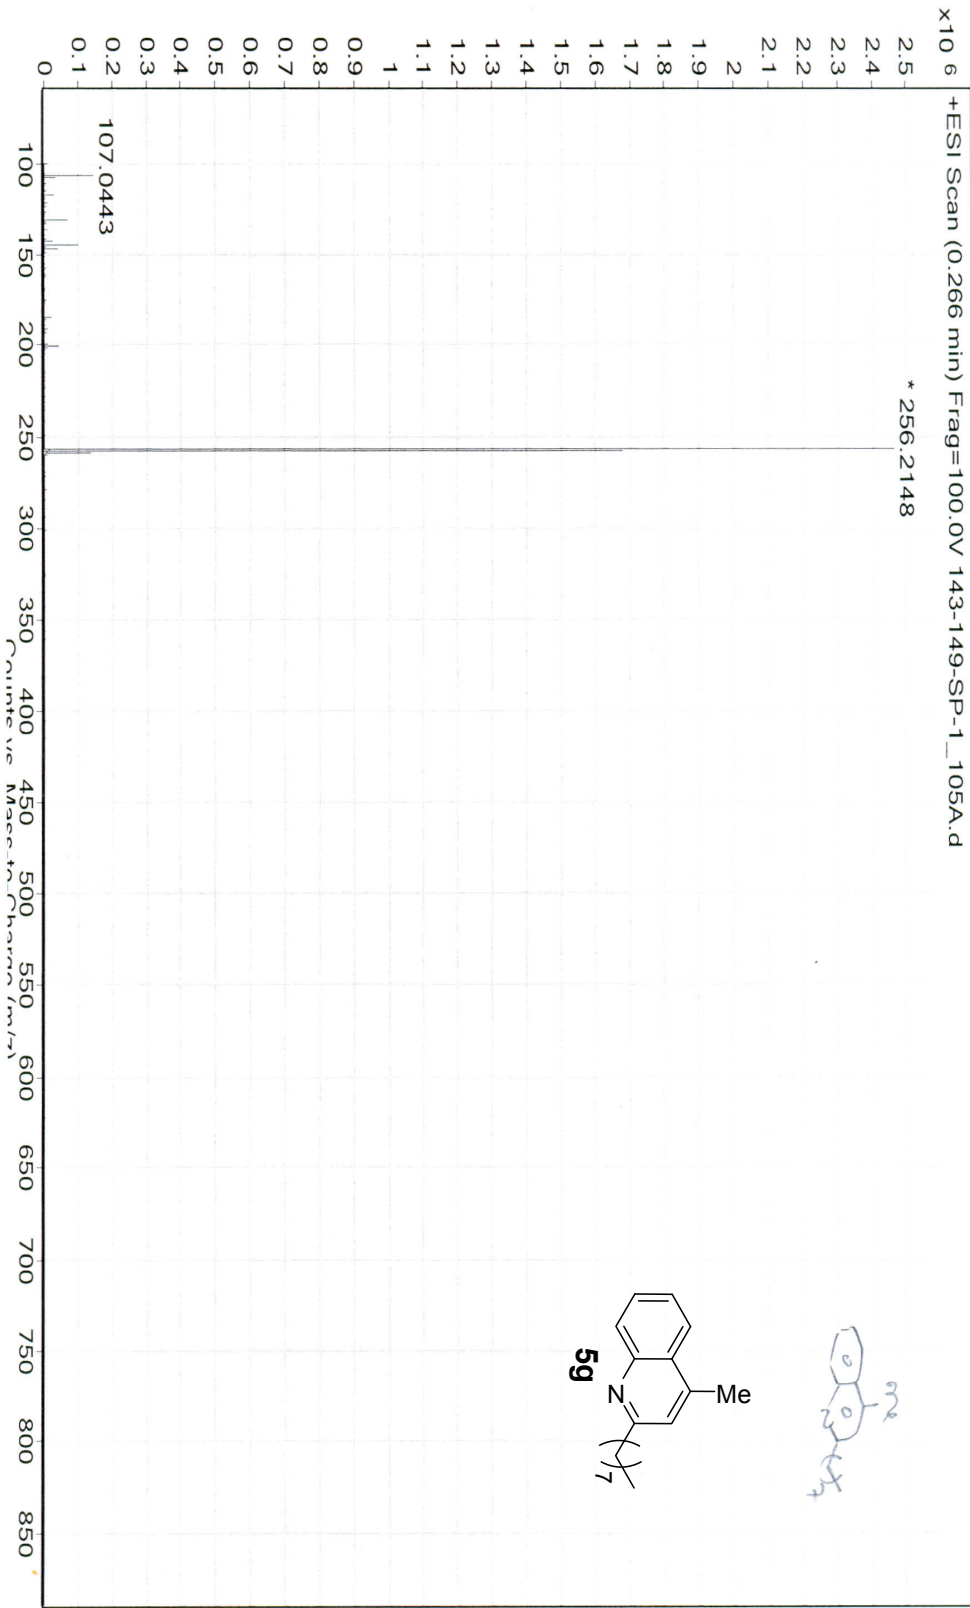

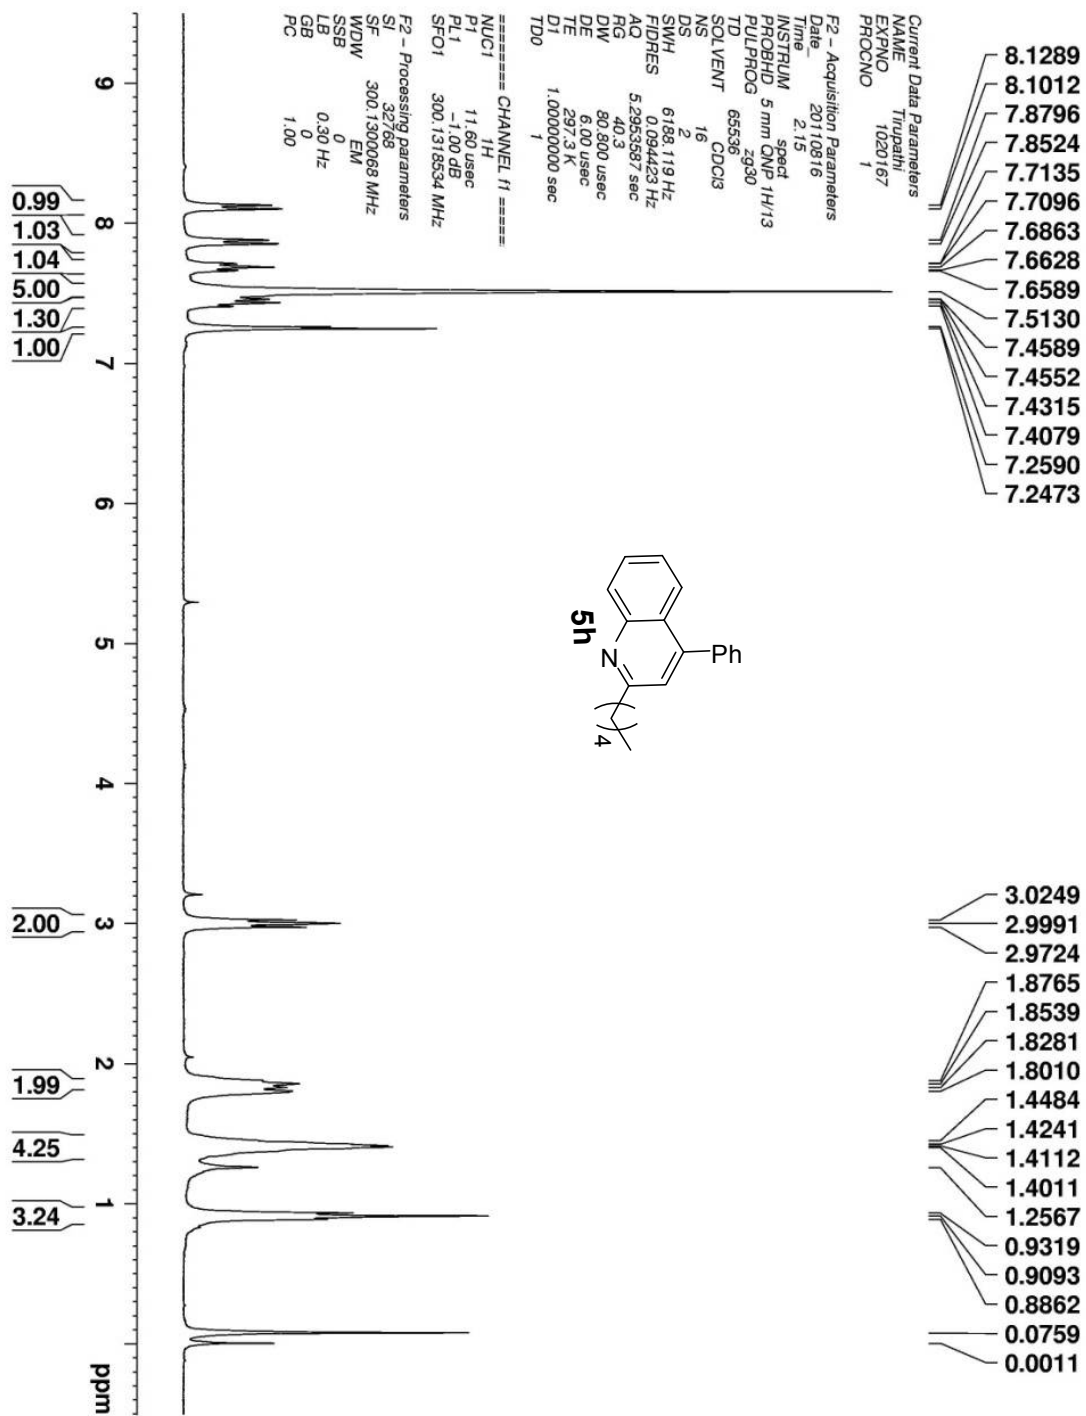

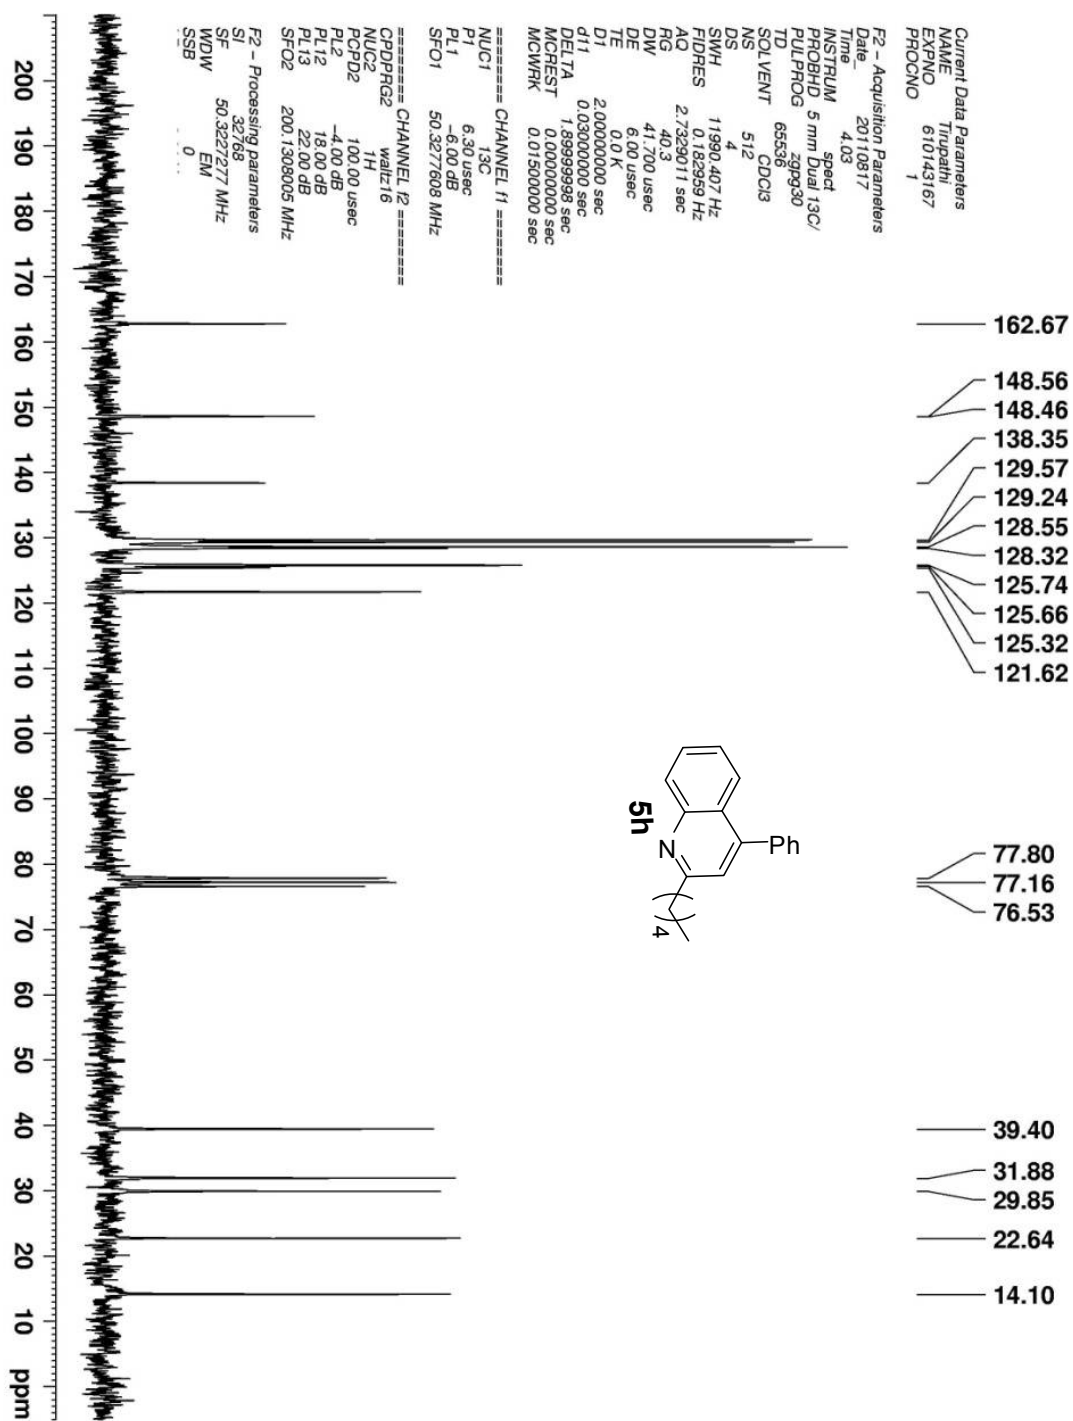

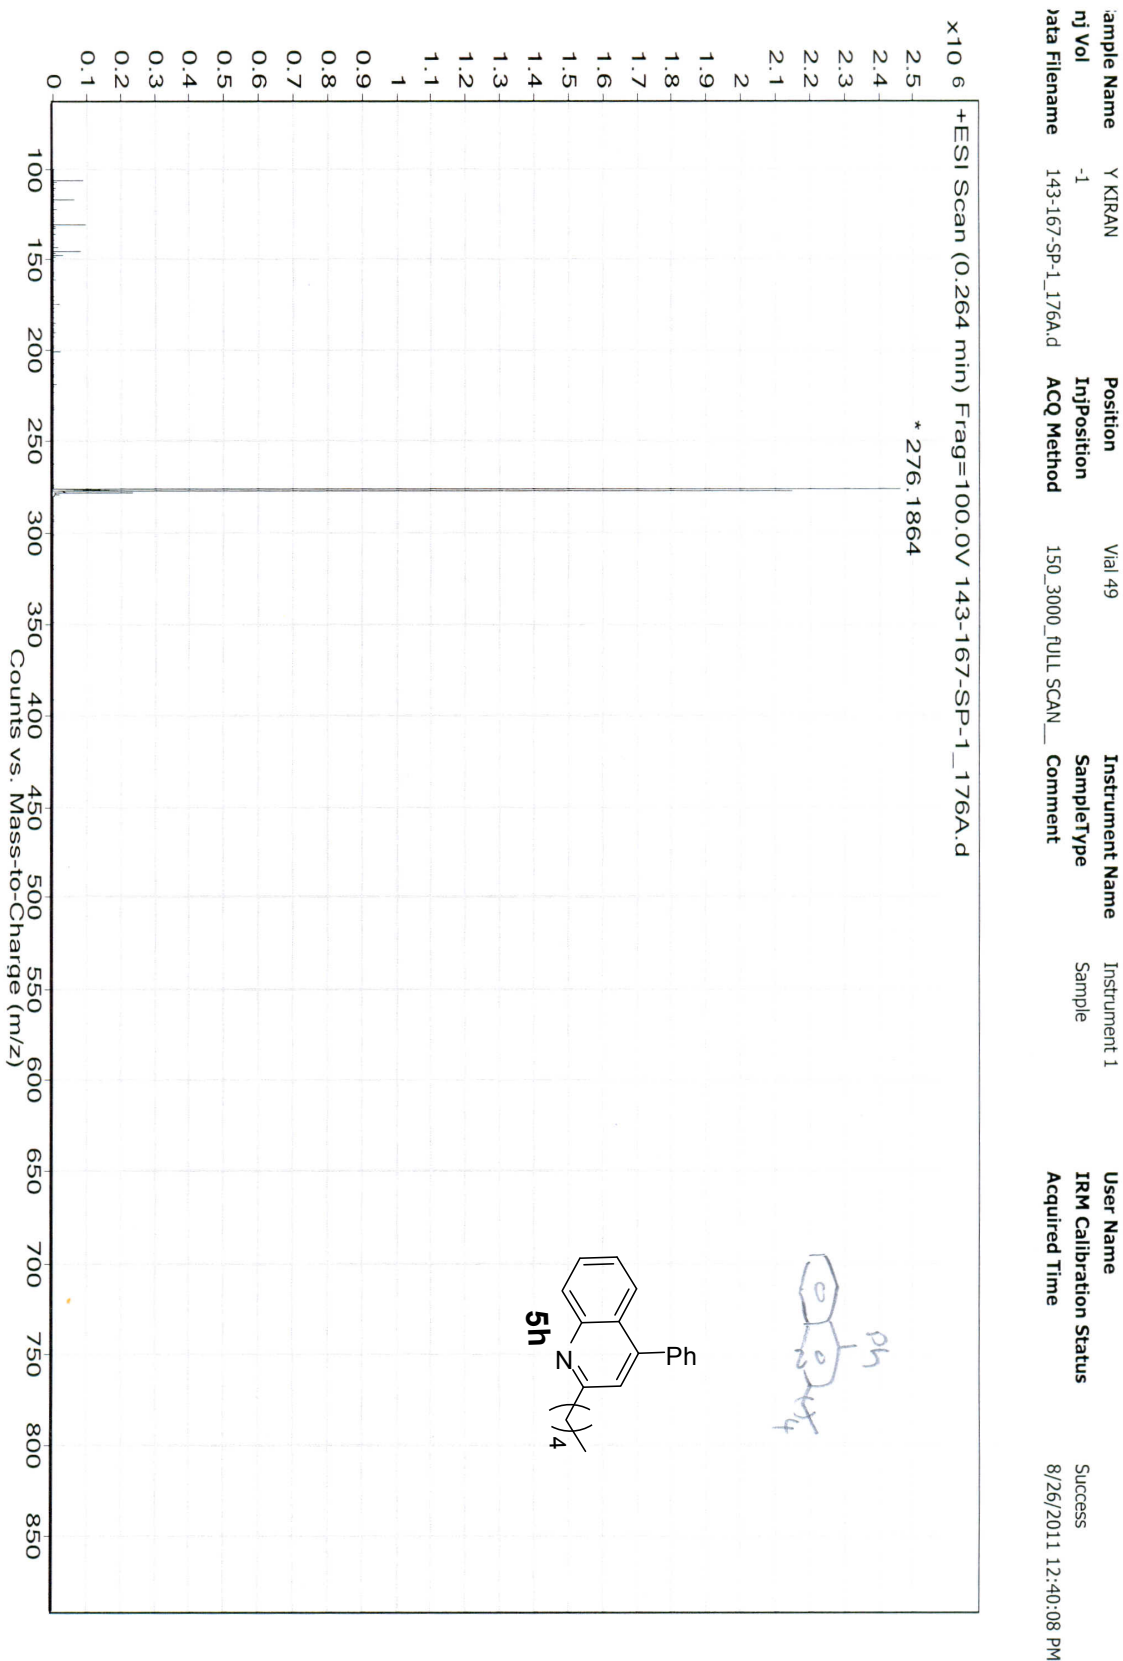

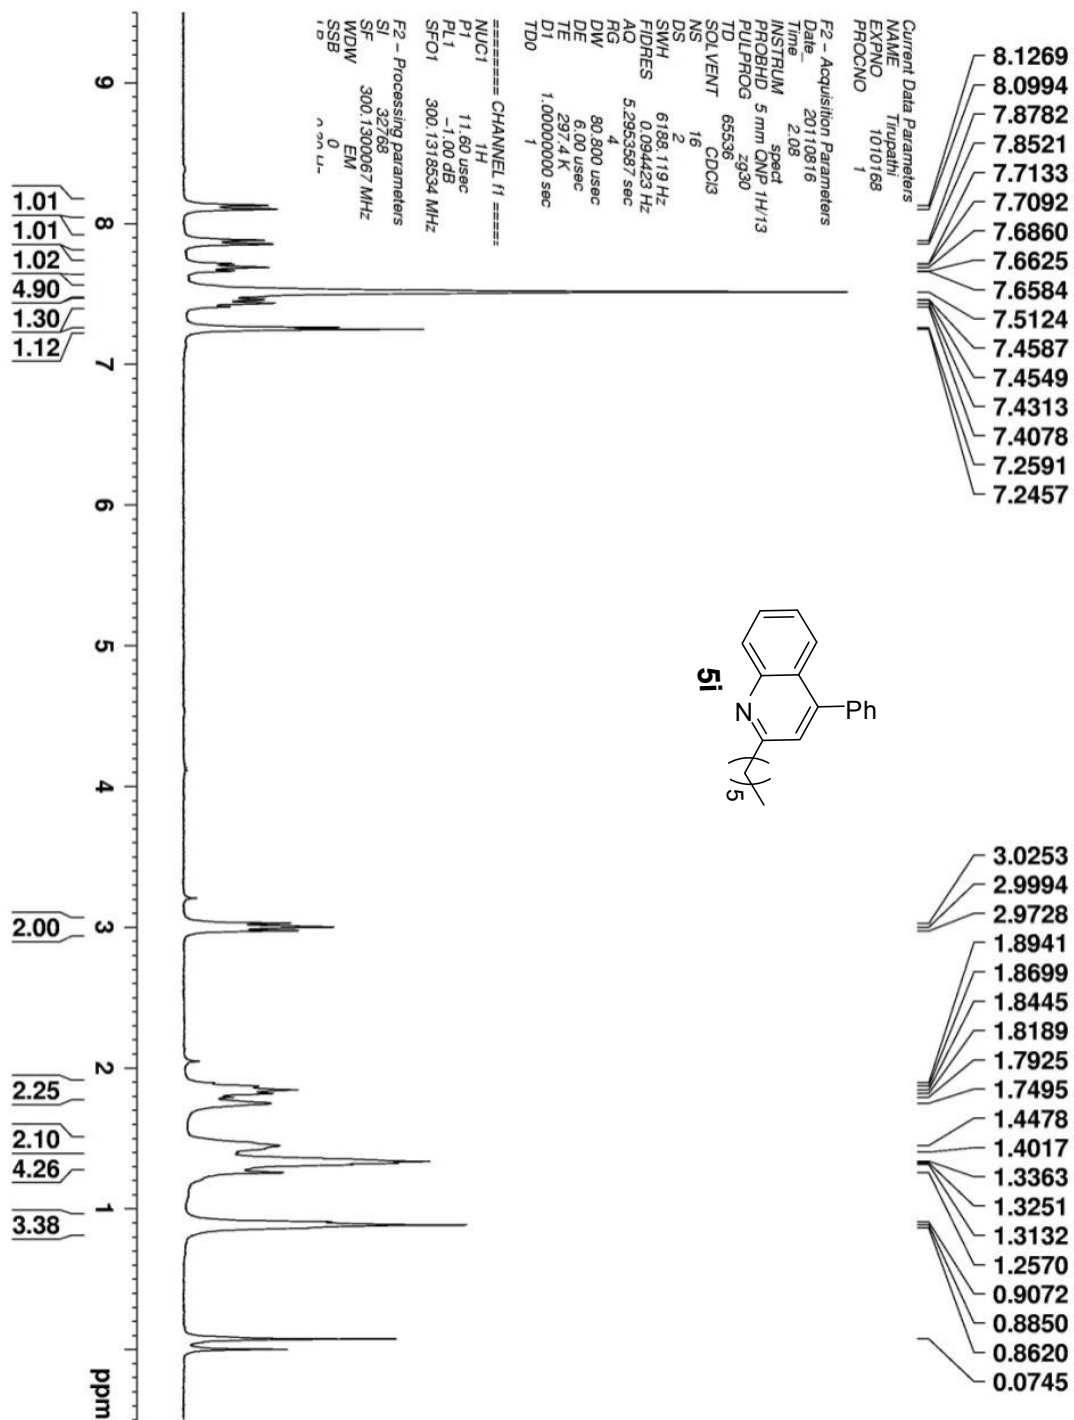

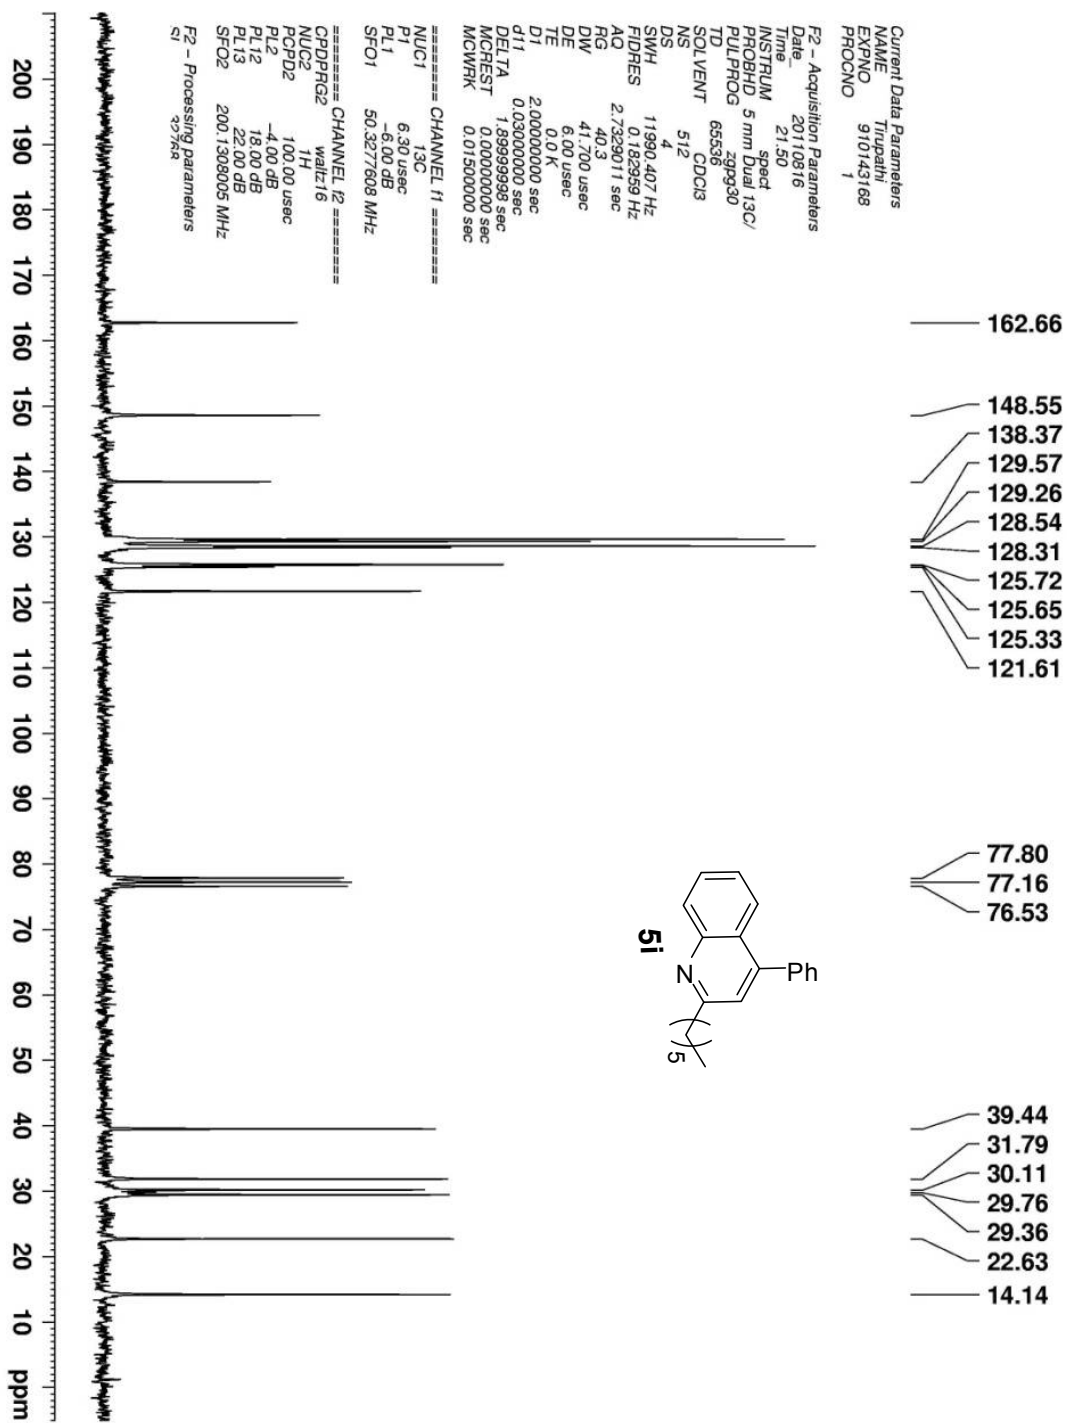



|               |                    |             |                    |                 |              |                    |                       |
|---------------|--------------------|-------------|--------------------|-----------------|--------------|--------------------|-----------------------|
| Sample Name   | N THIRUPATHI       | Position    | Via 41             | Instrument Name | Instrument 1 | User Name          | IRM                   |
| Inj Vol       | -1                 | InjPosition |                    | SampleType      | Sample       | Calibration Status |                       |
| Data Filename | 143-168SP-1_168A.d | ACQ Method  | 150_3000_FULL SCAN | Comment         |              | Acquired Time      | 8/26/2011 11:52:21 AM |
|               |                    |             |                    |                 |              | Success            |                       |

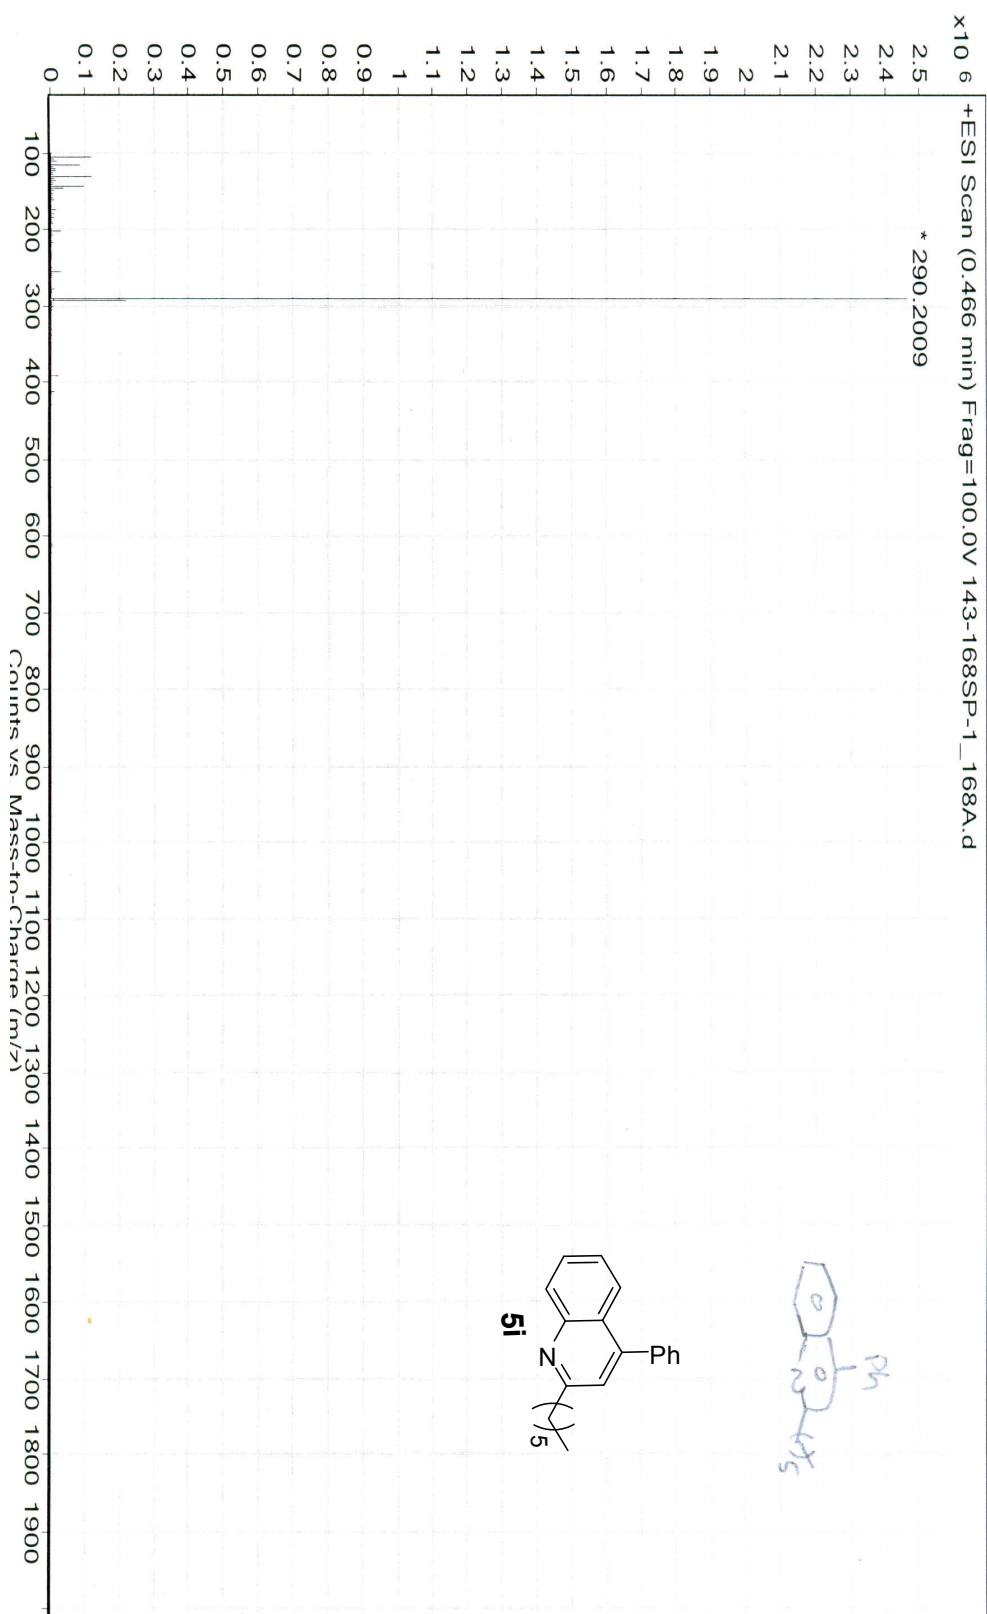

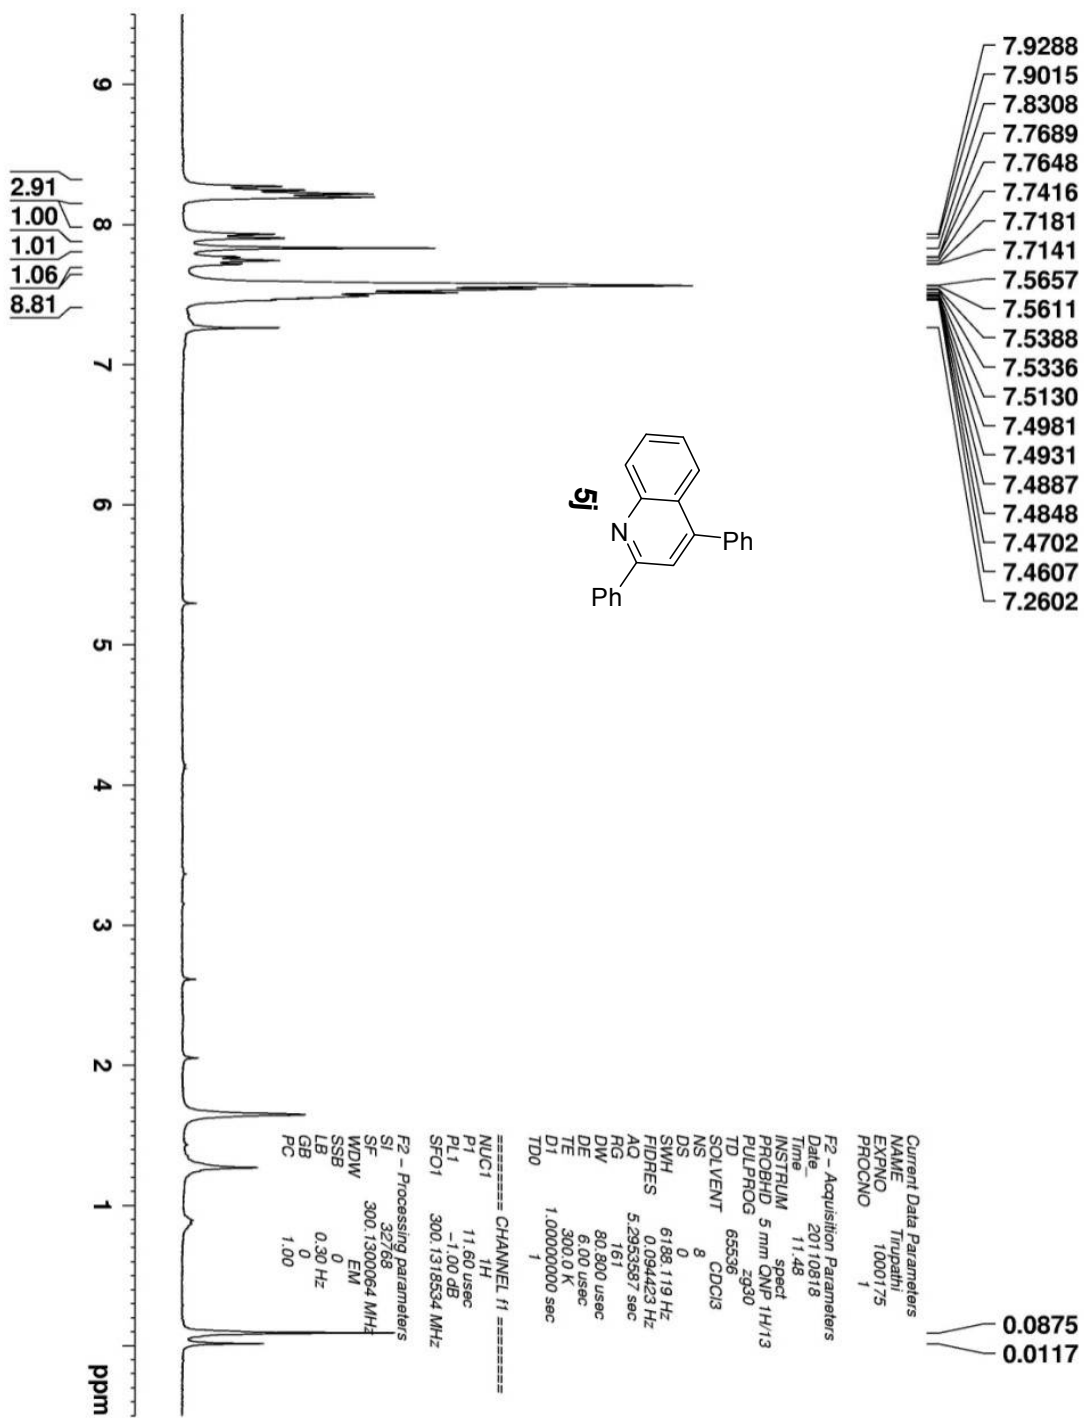

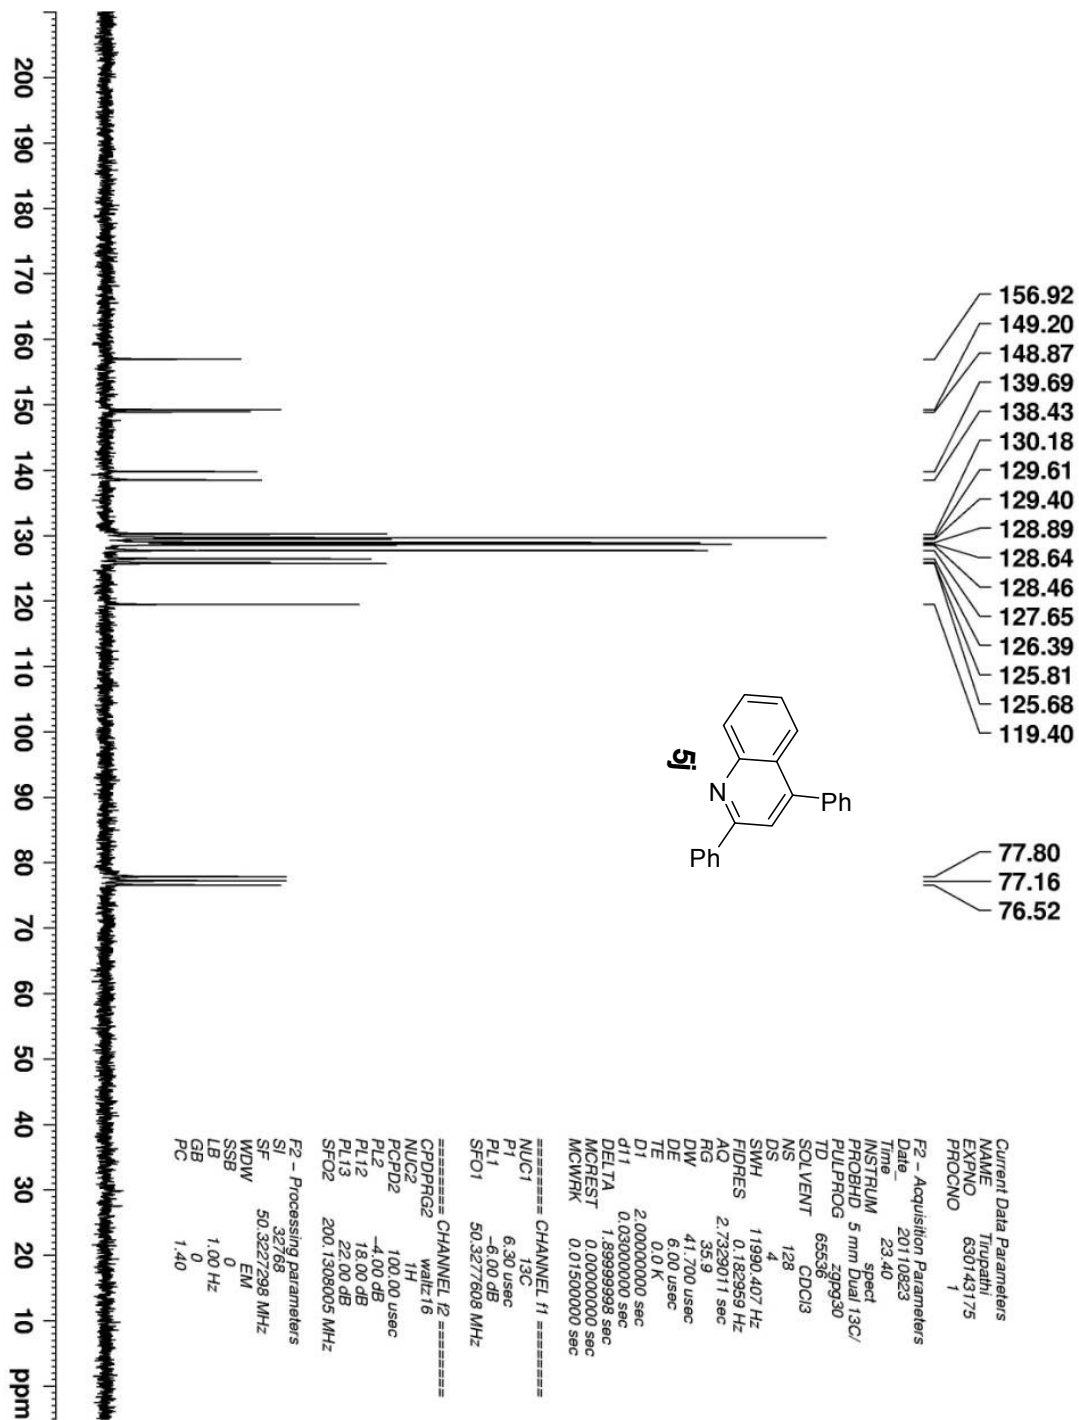

|               |                      |             |                      |                 |              |                        |                     |
|---------------|----------------------|-------------|----------------------|-----------------|--------------|------------------------|---------------------|
| Sample Name   | 143-175-SRI          | Position    | Vial 22              | Instrument Name | Instrument 1 | User Name              |                     |
| Inj Vol       | -1                   | InjPosition |                      | SampleType      | Sample       | IRM Calibration Status | Success             |
| Data Filename | 150_3000_FULL_SCAN__ | ACQ Method  | 150_3000_FULL_SCAN__ | Comment         |              | Acquired Time          | 9/1/2011 5:27:14 PM |

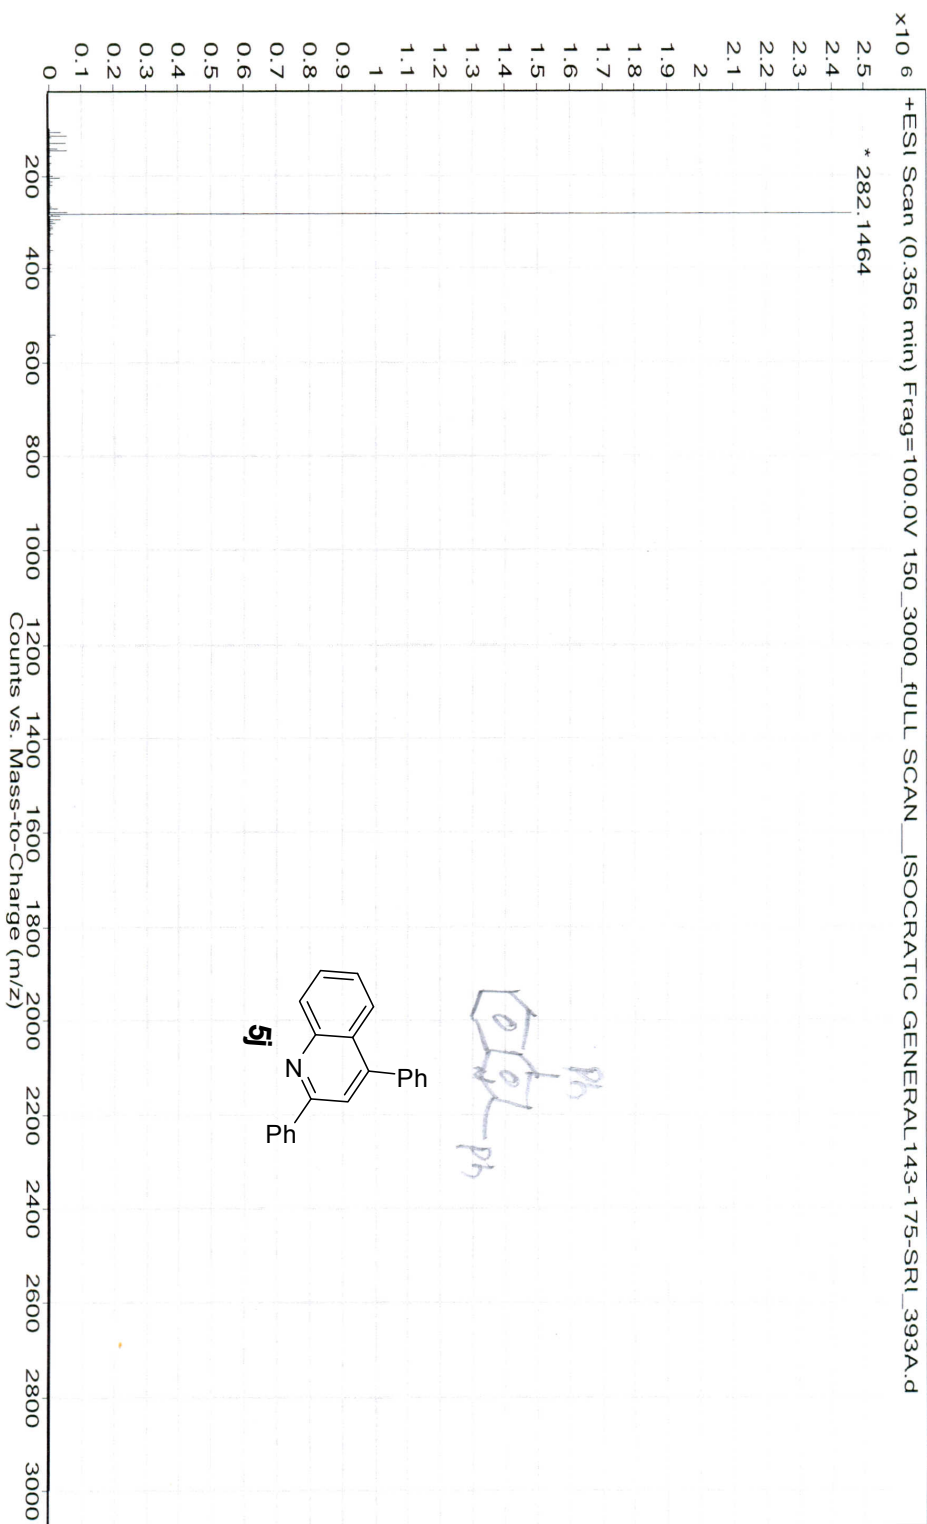

Supplement: c2ra20213a.pdf [file c2ra20213a.pdf]
